# Supplementary material for: Differential Impact of CD43 and CD28 on T-Cell Differentiation Depending on the Order of Engagement with the TCR
Source: MDPI journal article supplement (doi:10.3390/ijms25063135), 2024-03-08
Supplement: s1 [file s1]

## **SUPPLEMENTARY FIGURES**

### **Differential Impact of CD43 and CD28 on T-Cell Differentiation Depending on the Order of Engagement with the TCR**

**Montserrat Alba Sandoval-Hernández et al.**

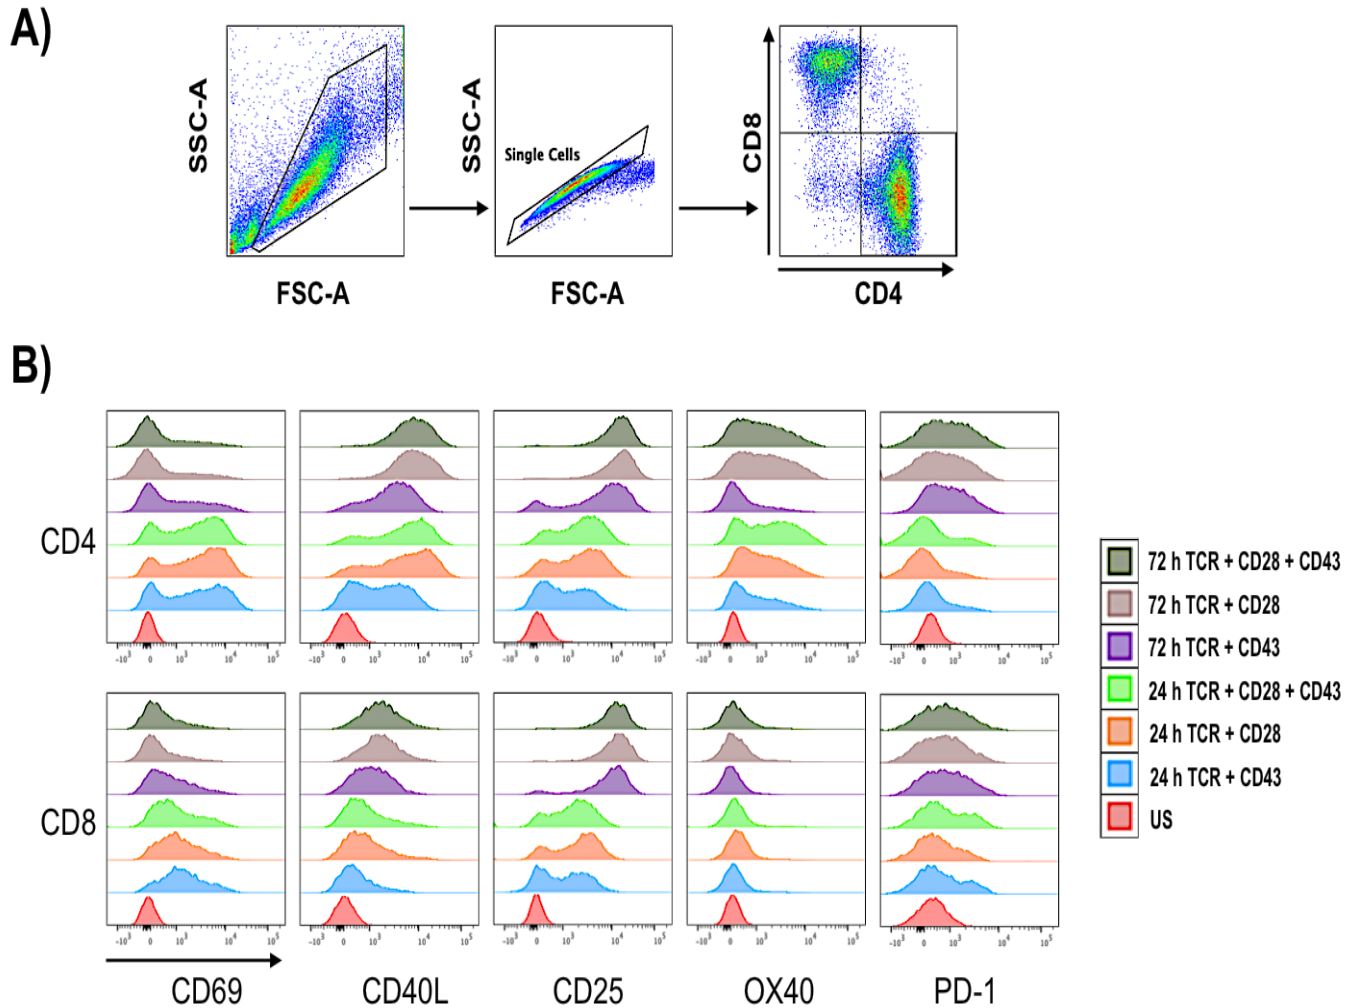

**Supplementary Figure S1.**

Expression of activation-induced markers in response to TCR+CD28, TCR+CD43, or TCR+CD28+CD43 stimulation. Human T lymphocytes were stimulated as described in the Materials and Methods section. **A)** workflow analysis stages for all donors: data preprocessing, FCS files imported, Compensated sample files were analyzed starting by creating an SSC vs. FSC plot and applying a linear transformation for the scatter channels and selecting CD4<sup>+</sup> T and CD8<sup>+</sup> lymphocytes gates. **B)** The CD69, CD40L, CD25, OX40, PD-1 expression was assessed in the CD4 and CD8 populations at 24 and 72 h. Mean fluorescence intensity (MFI) values were obtained for each activation marker throughout the evaluated stimuli. Multiple histogram comparisons between stimuli represent a summary of the analysis following the order and color code indicated. Data shown are representative of 1 out of 12 independent donors.

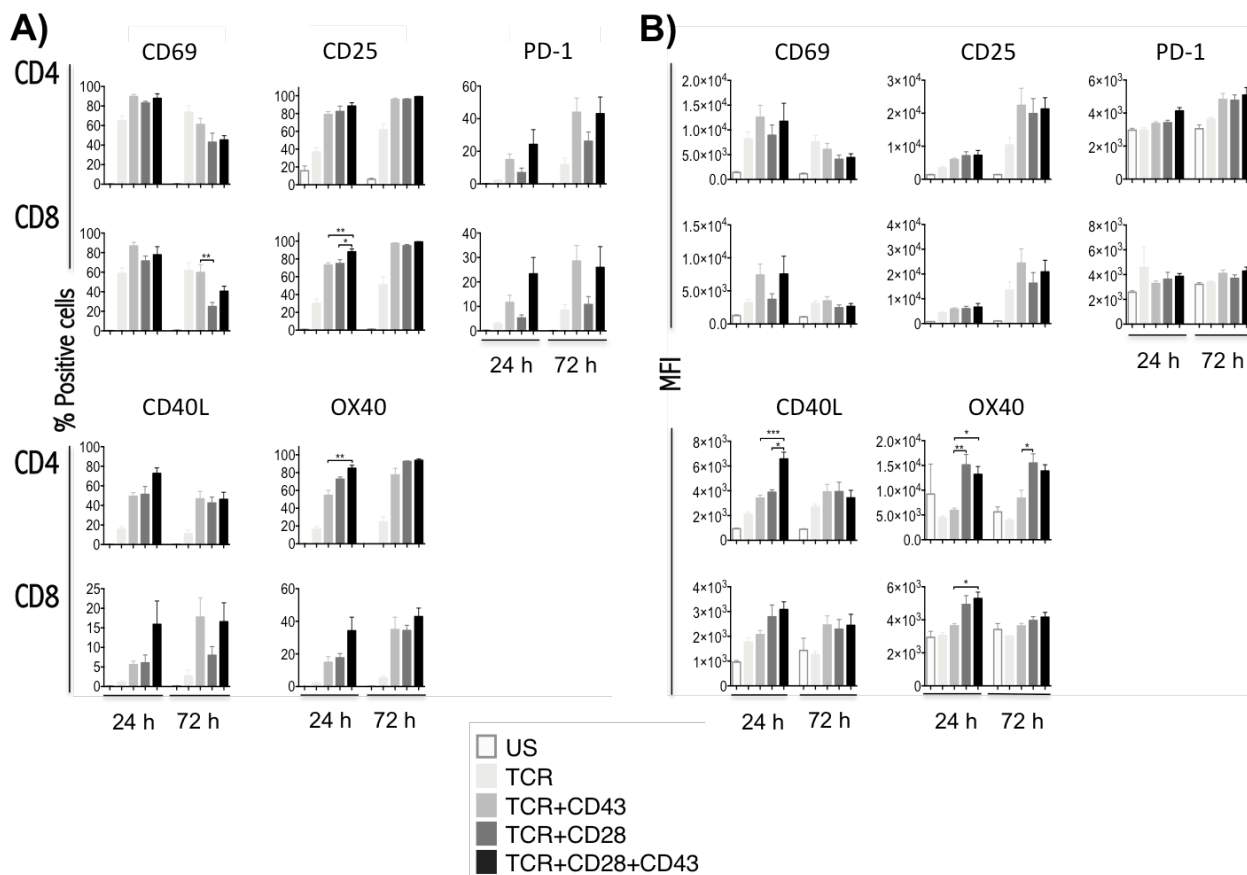

**Supplementary Figure S2.** Human T lymphocytes were stimulated as described in the Materials and Methods section. Following the workflow analysis described in Supplementary Figure S1, the expression of CD69, CD40L, CD25, OX40, and PD-1, in the CD4 and CD8 cells of all donors at 24 and 72 h post-stimulation and expressed as Percentages (%) of positive cells for each marker (**A**), and Mean fluorescence intensity (MFI) (**B**). Significance is marked only between co-stimulus comparisons: \* $p < 0.05$ , \*\* $p < 0.01$ , \*\*\* $p < 0.001$ , \*\*\*\* $p < 0.0001$ .  $n=12$  for all the TCR+CD28 and TCR+CD43 stimuli, and  $n=4$  for the TCR+CD28+CD43 stimulus.

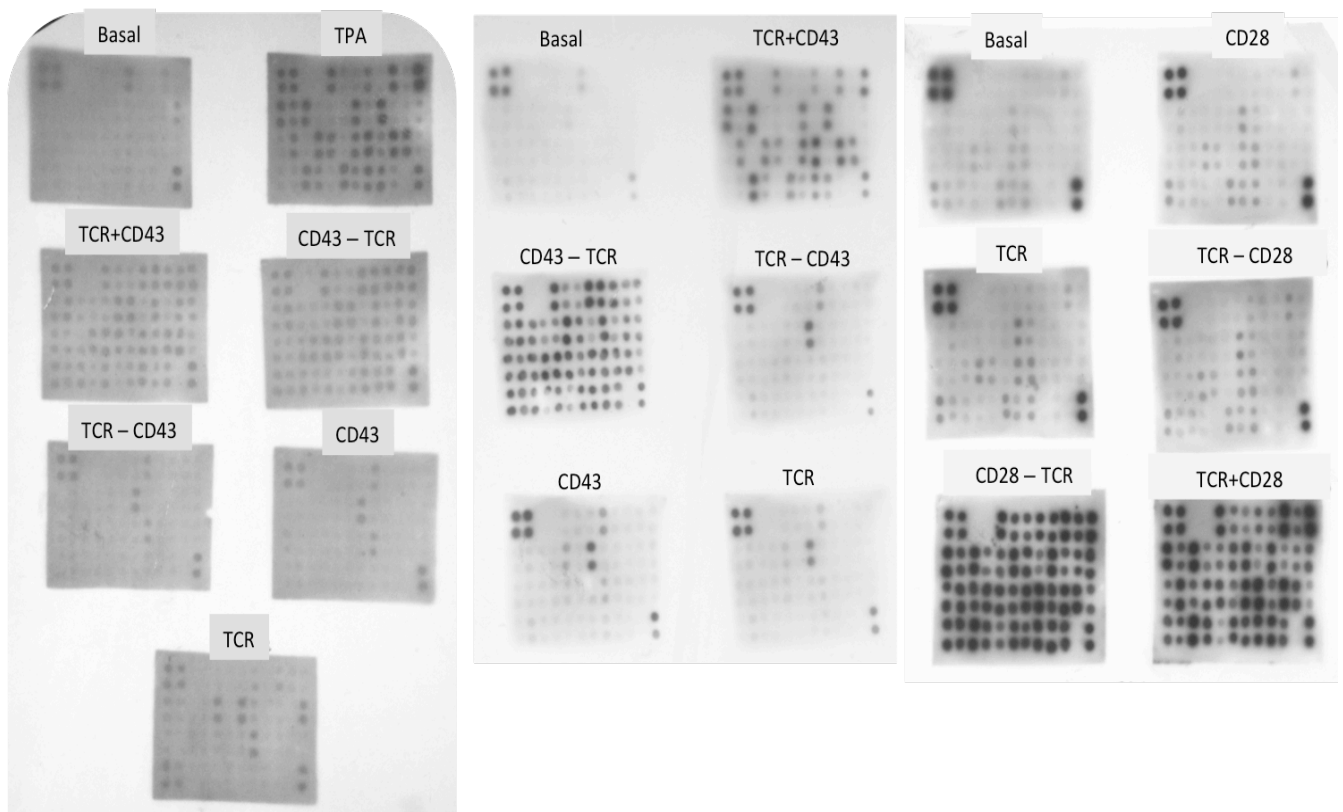

**Supplementary Figure S3. The timing of CD43, CD28, and TCR signaling influences the T-cell response.**

T lymphocytes isolated from peripheral blood of healthy donors were stimulated with the first stimulus two hours before applying the second stimulus, after which the cells were incubated for 48 hours. Cytokines released into the supernatant were detected with a commercial protein array. Data shown are the two (CD43) and one (CD28) complementary series of Figure 2A, with different donors.

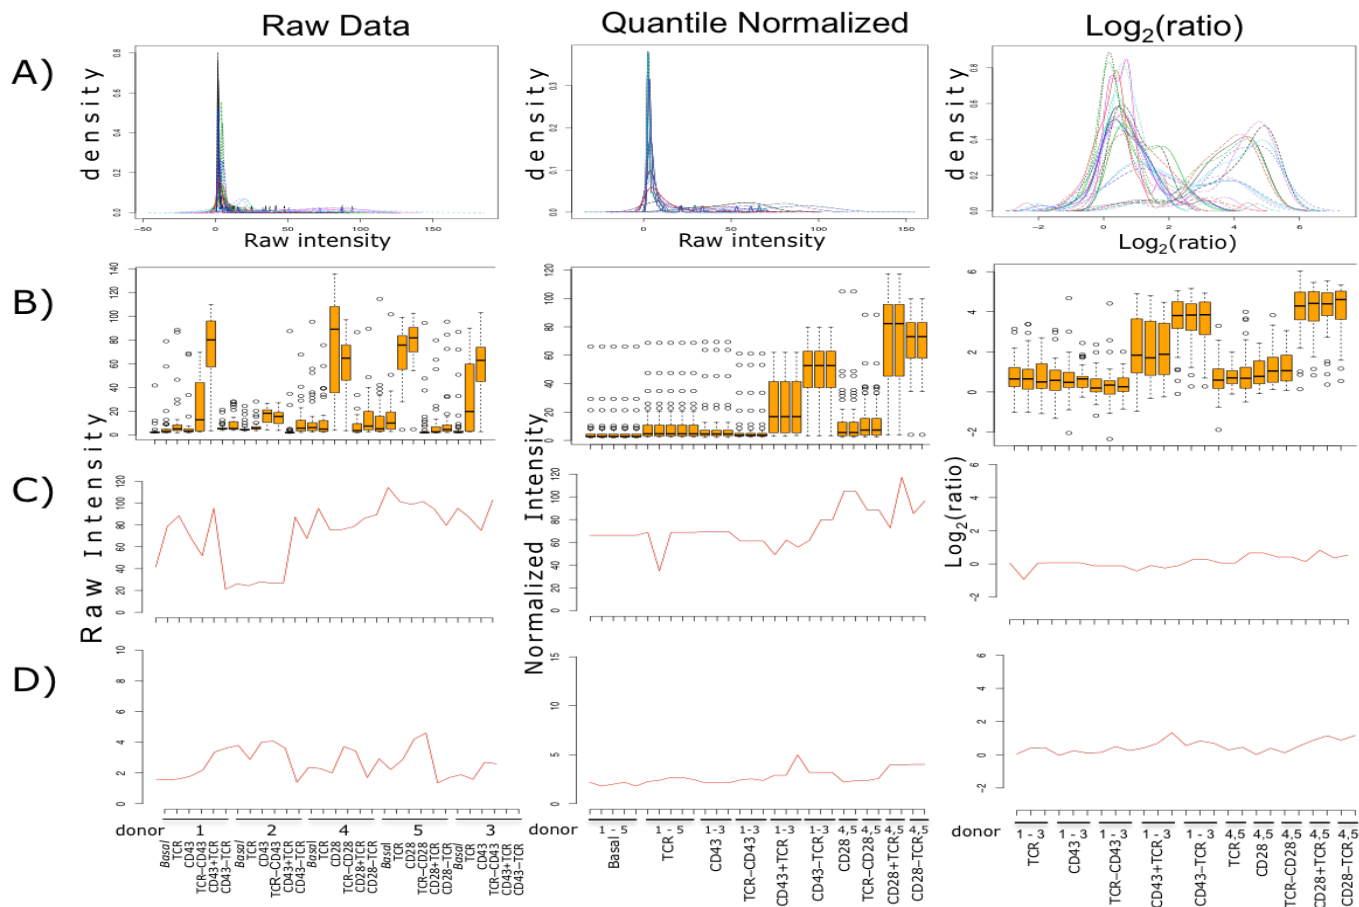

**Supplementary Figure S4. Data normalization.**

Films of the cytokine antibody arrays of the three (CD43) and two (CD28) independent experiments with different donors from **Figure 2A** and **Supplementary Figure S3** were scanned. The normalization process started with the raw data shown in the left column: Basal, TCR, CD43 [CD43, TCR-CD43, CD43+TCR, CD43-TCR] and CD28 [CD28, TCR-CD28, CD28+TCR, CD28-TCR] stimuli. Raw intensities were normalized across biological replicates using quantiles (center column). Relative expression values were computed as the log<sub>2</sub> ratio of a given experimental value divided by its corresponding value in non-stimulated cells. A and B) Data distribution. C) Positive controls across samples. D) Negative controls across samples.

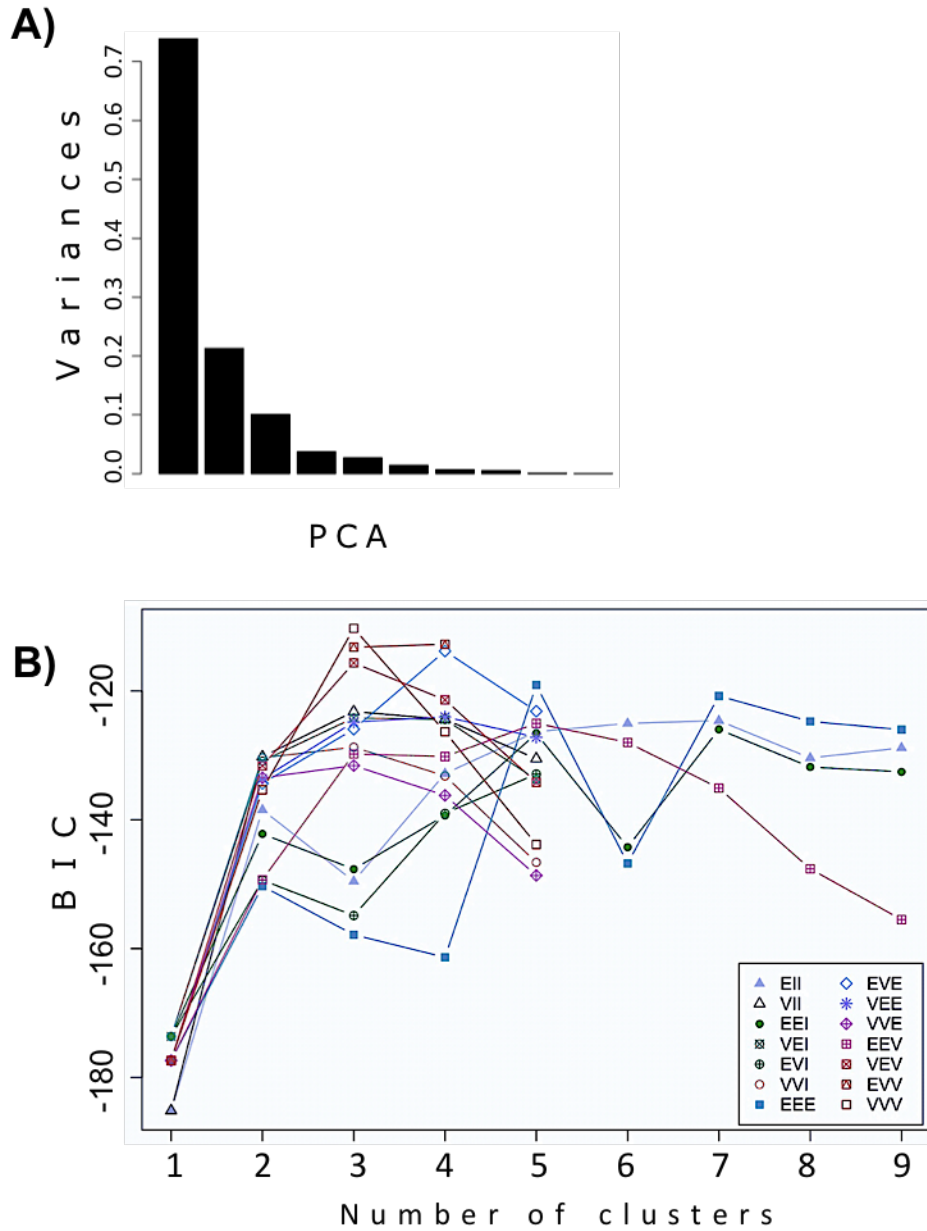

**Supplementary Figure S5. Identification of components and protein profiles.**

Principal component analysis (PCA), clustering and classification. The  $\log_2$  ratios of cytokine intensity values from cells stimulated with [TCR-CD43], [TCR-CD28], [CD43+TCR], [CD28+TCR], [CD43-TCR], and [CD28-TCR] (Figure 2B) were used to obtain the Spearman correlation coefficient between the 42 cytokines. This correlation matrix was the input for PCA. **A)** PCA variance graphed as a scree plot revealed 83% of variance explained by the first two components. **B)** Mclust was used to perform clustering and classification of the first two components of the PCA. The Bayesian Information Coefficient (BIC) score (-110.2721) indicated the unconstrained Gaussian mixture model VVV of three components or clusters as the best-fitting model.

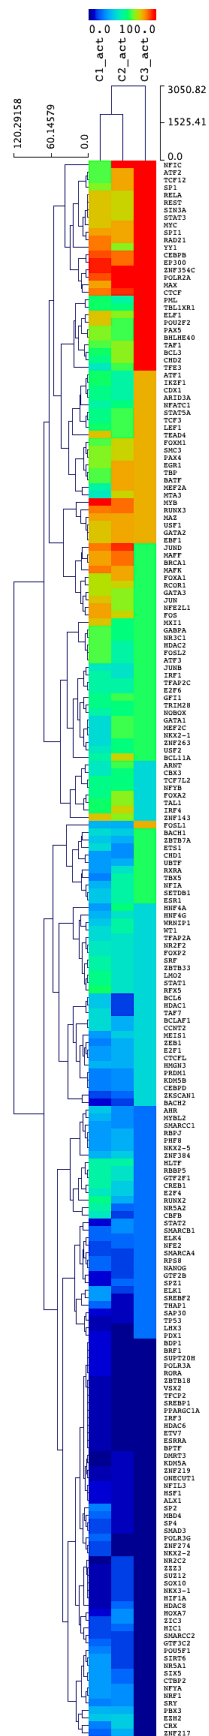

**Supplementary Figure S6. TF prediction percentages throughout the profiles.**

Starting from the matrix of presence and absence of TFs predicted via ENCODE+TRANSFAC, protein-coding genes were ordered based on the profiles defined in C1, C2, and C3 (**Supplementary data Table S4: MatrixTFs & mRNAseqRoadmap**). The frequency of usage of each TF through each profile was calculated to construct a matrix of prediction percentages (**Supplementary data Table S4: TFspercentages**), and the resultant heat map (rainbow scale: blue 0%, red 100%) was ordered from the highest to lowest percentage (**Supplementary data Table S4: MatrixTFsordered percentages**). The hierarchical clustering conditions included the average linkage algorithm and the Manhattan correlation metric.
