# Supplementary material for: Differential Impact of CD43 and CD28 on T-Cell Differentiation Depending on the Order of Engagement with the TCR
Source: Int J Mol Sci. 2024 Mar 8;25(6):3135. doi: 10.3390/ijms25063135 (PMC10970108; doi:10.3390/ijms25063135)
Supplement: Supplementary file 1 [file ijms-25-03135-s001.zip]

Archive with 6 entries (6 files):
- Supplementary data IPA_D&F_TFs.xlsx
- Supplementary data Table S4.xlsx
- Supplementary Figures.pdf
- Table S1.csv
- Table S2.xlsx
- Table S3.xlsx
