# Supplementary material for: Differential Impact of CD43 and CD28 on T-Cell Differentiation Depending on the Order of Engagement with the TCR
Source: Int J Mol Sci. 2024 Mar 8;25(6):3135. doi: 10.3390/ijms25063135 (PMC10970108; doi:10.3390/ijms25063135)
Supplement: Supplementary file 1 [file ijms-25-03135-s001.zip › Supplementary data IPA_D&F_TFs.xlsx]

## Sheet: I
© 2000-2016 QIAGEN. All rights reserved.
Categories	Diseases or Functions Annotation	p-Value	Molecules	# Molecules
Gene Expression	activation of DNA endogenous promoter	2.37E-48	BRCA1,CDX1,CEBPB,CTCF,EGR1,ELF1,EP300,ETS1,FOS,FOXA1,FOXA2,GATA1,GATA2,GATA3,IRF1,IRF3,IRF4,JUN,LEF1,MAFF,MAX,MEF2A,MEF2C,MYB,MYC,NFKB1,POLR2A,POU5F1,RAD21,REL,RELA,REST,SP1,STAT1,STAT2,STAT3,TAF1,TBP,TCF12,TCF7L2,TFAP2A,TFAP2C,TFE3,USF1,USF2,YY1,ZEB1	47
Gene Expression	transcription of DNA	7.53E-45	BRCA1,CDX1,CEBPB,CTCF,EGR1,ELF1,EP300,ETS1,FOS,FOXA1,FOXA2,GATA1,GATA2,GATA3,IRF1,IRF3,IRF4,JUN,LEF1,MAFF,MAX,MEF2A,MEF2C,MYB,MYC,NFKB1,POLR2A,POU5F1,RAD21,REL,RELA,REST,SP1,SPI1,STAT1,STAT2,STAT3,TAF1,TBP,TCF12,TCF7L2,TFAP2A,TFAP2C,TFE3,USF1,USF2,YY1,ZBTB7A,ZEB1	49
Gene Expression	transcription of RNA	1.44E-43	BRCA1,CDX1,CEBPB,CTCF,EGR1,ELF1,EP300,ETS1,FOS,FOXA1,FOXA2,GATA1,GATA2,GATA3,IRF1,IRF3,IRF4,JUN,LEF1,MAFF,MAX,MEF2A,MEF2C,MYB,MYC,NFKB1,POLR2A,POU5F1,RAD21,REL,RELA,RELB,REST,RFX5,SP1,SPI1,STAT1,STAT2,STAT3,TAF1,TBP,TCF12,TCF7L2,TFAP2A,TFAP2C,TFE3,USF1,USF2,YY1,ZBTB7A,ZEB1	51
Gene Expression	binding of DNA	3.44E-34	BRCA1,CEBPB,EBF1,EGR1,EP300,ETS1,FOS,GATA1,GATA3,IRF1,IRF3,JUN,MAX,MYB,MYC,NFKB1,POU5F1,RAD21,REL,RELA,RELB,REST,SP1,SPI1,STAT1,STAT3,TFAP2A,USF1,USF2,ZBTB7A	30
Gene Expression	binding of protein binding site	5.79E-26	BRCA1,CEBPB,EBF1,EGR1,ETS1,FOS,GATA3,IRF1,IRF3,JUN,MAX,MYB,MYC,POU5F1,RELA,STAT1,STAT3,TFAP2A,USF1,USF2	20
Gene Expression	transactivation	1.79E-25	BATF,BRCA1,CEBPB,EGR1,EP300,FOS,GATA1,GATA3,IRF3,IRF4,JUN,MAX,MYB,MYC,NFE2L1,NFKB1,POU5F1,RELA,SP1,SPI1,STAT1,STAT2,STAT3,TBP,TCF7L2,USF1	26
Gene Expression	transactivation of RNA	1.65E-24	BATF,BRCA1,CEBPB,EGR1,EP300,FOS,GATA3,IRF3,IRF4,JUN,MAX,MYB,MYC,NFE2L1,NFKB1,POU5F1,RELA,SP1,SPI1,STAT1,STAT2,STAT3,TBP,TCF7L2,USF1	25
Cellular Development	differentiation of cells	6.33E-23	BRCA1,CEBPB,CTCF,EP300,ETS1,FOXA1,FOXA2,GATA1,GATA2,GATA3,IKZF1,IRF1,JUN,LEF1,MAFK,MAX,MEF2C,MYB,MYC,POU5F1,REL,RELA,REST,SPI1,STAT1,STAT3,TCF7L2,TFAP2A,USF1,ZEB1	30
Cell Death and Survival	apoptosis	8.88E-22	BRCA1,CDX1,CEBPB,CTCF,EBF1,EGR1,EP300,ETS1,FOS,GATA1,IKZF1,IRF1,IRF3,IRF4,JUN,LEF1,MAX,MEF2A,MYB,MYC,NFE2L1,NFKB1,PAX4,POLR2A,POU5F1,RAD21,REL,RELA,RELB,REST,SP1,SPI1,STAT1,STAT2,STAT3,TCF12,TFAP2A,YY1,ZEB1	39
Cell Death and Survival	apoptosis of tumor cell lines	8.91E-22	BRCA1,CDX1,CEBPB,CTCF,EBF1,EGR1,EP300,ETS1,FOS,IKZF1,IRF1,IRF3,IRF4,JUN,MAX,MEF2A,MYB,MYC,NFE2L1,NFKB1,POU5F1,RAD21,REL,RELA,RELB,REST,SP1,SPI1,STAT1,STAT2,STAT3,TFAP2A,YY1,ZEB1	34
Cellular Growth and Proliferation	proliferation of cells	3.94E-20	BATF,BRCA1,CDX1,CEBPB,CTCF,EGR1,ELF1,EP300,ETS1,FOS,FOXA1,GATA1,GATA2,IKZF1,IRF1,IRF3,IRF4,JUN,LEF1,MAFF,MAX,MEF2C,MYB,MYC,NFKB1,POU5F1,RAD21,REL,RELA,RELB,REST,SP1,SPI1,STAT1,STAT2,STAT3,TBP,TCF12,TCF7L2,TFAP2A,TFAP2C,YY1,ZBTB7A,ZEB1	44
Cell Death and Survival	cell death of tumor cell lines	1.96E-19	BRCA1,CDX1,CEBPB,CTCF,EBF1,EGR1,EP300,ETS1,FOS,IKZF1,IRF1,IRF3,IRF4,JUN,MAX,MEF2A,MYB,MYC,NFE2L1,NFKB1,POU5F1,RAD21,REL,RELA,RELB,REST,SP1,SPI1,STAT1,STAT2,STAT3,TFAP2A,TFAP2C,YY1,ZEB1	35
Cellular Development, Cellular Growth and Proliferation	cell proliferation of tumor cell lines	3.83E-19	BRCA1,CDX1,CEBPB,CTCF,EGR1,EP300,ETS1,FOS,FOXA1,IKZF1,IRF1,IRF4,JUN,LEF1,MAX,MEF2C,MYB,MYC,NFKB1,RAD21,REL,RELA,REST,SP1,SPI1,STAT1,STAT2,STAT3,TCF12,TCF7L2,TFAP2A,TFAP2C,YY1,ZBTB7A,ZEB1	35
Cell Death and Survival	cell death	1.01E-18	BRCA1,CDX1,CEBPB,CTCF,EBF1,EGR1,EP300,ETS1,FOS,GATA1,IKZF1,IRF1,IRF3,IRF4,JUN,LEF1,MAX,MEF2A,MYB,MYC,NFE2L1,NFKB1,PAX4,POLR2A,POU5F1,RAD21,REL,RELA,RELB,REST,SP1,SPI1,STAT1,STAT2,STAT3,TCF12,TFAP2A,TFAP2C,YY1,ZEB1	40
Cell Death and Survival	necrosis	1.38E-18	BRCA1,CDX1,CEBPB,CTCF,EBF1,EGR1,EP300,ETS1,FOS,GATA1,IKZF1,IRF1,IRF3,IRF4,JUN,MAX,MEF2A,MYB,MYC,NFE2L1,NFKB1,POU5F1,RAD21,REL,RELA,RELB,REST,SP1,SPI1,STAT1,STAT2,STAT3,TCF12,TFAP2A,TFAP2C,YY1,ZEB1	37
Cancer, Organismal Injury and Abnormalities	benign neoplasia	1.17E-14	BRCA1,CTCF,EGR1,EP300,FOS,FOXA1,FOXA2,GATA2,GATA3,JUN,LEF1,MAX,MYB,MYC,NFKB1,PAX5,RAD21,RELA,SMC3,STAT1,STAT3,TAF1,TCF12,TFAP2C,ZEB1	25
Cellular Development, Tissue Development	differentiation of connective tissue	3.62E-14	CEBPB,CTCF,ETS1,GATA1,GATA2,GATA3,IKZF1,IRF1,MAFK,MAX,MYB,MYC,SPI1,STAT3,TCF7L2	15
Cancer, Organismal Injury and Abnormalities, Reproductive System Disease	mammary tumor	5.00E-14	BRCA1,CEBPB,CTCF,EGR1,EP300,ETS1,FOS,FOXA1,GATA1,GATA3,IRF1,JUN,MAX,MYB,MYC,NFE2L1,PAX5,POLR2A,POU5F1,RAD21,REL,RELA,RELB,RFX5,SMC3,SPI1,STAT1,STAT2,STAT3,TAF1,TFAP2A,TFE3,YY1,ZEB1	34
Cellular Development, Hematological System Development and Function	differentiation of blood cells	1.18E-13	CTCF,ETS1,GATA1,GATA2,GATA3,IKZF1,IRF1,JUN,LEF1,MAFK,MAX,MYB,MYC,SPI1,STAT3	15
Cancer, Organismal Injury and Abnormalities, Reproductive System Disease	breast cancer	1.70E-13	BRCA1,CEBPB,CTCF,EGR1,EP300,ETS1,FOS,FOXA1,GATA1,GATA3,IRF1,JUN,MAX,MYB,MYC,NFE2L1,PAX5,POLR2A,POU5F1,RAD21,REL,RELA,RELB,RFX5,SMC3,SPI1,STAT1,STAT2,STAT3,TAF1,TFE3,YY1,ZEB1	33
Cellular Movement	migration of tumor cell lines	4.36E-13	BRCA1,CDX1,CEBPB,EGR1,ETS1,FOXA1,GATA3,JUN,LEF1,MYC,RELA,REST,SP1,STAT1,STAT3,TCF12,TCF7L2,TFAP2A,TFAP2C,ZBTB7A,ZEB1	21
Cellular Movement	migration of cells	1.55E-12	BRCA1,CDX1,CEBPB,EGR1,ETS1,FOS,FOXA1,GATA1,GATA3,IRF3,JUN,LEF1,MYC,NFKB1,RELA,REST,SP1,STAT1,STAT3,TCF12,TCF7L2,TFAP2A,TFAP2C,ZBTB7A,ZEB1	25
Cellular Development, Hematological System Development and Function, Hematopoiesis, Tissue Development	differentiation of red blood cells	1.84E-12	CTCF,ETS1,GATA1,IKZF1,IRF1,MAX,MYB,MYC,SPI1	9
Cellular Development	differentiation of tumor cell lines	1.95E-12	CEBPB,CTCF,FOXA1,IRF1,JUN,MAX,MEF2C,MYB,MYC,POU5F1,SPI1,STAT1,STAT3	13
Cellular Development, Cellular Growth and Proliferation	cell proliferation of breast cancer cell lines	6.87E-12	BRCA1,CEBPB,CTCF,ETS1,FOS,IRF1,JUN,MYB,MYC,RELA,SP1,STAT3,TFAP2A,TFAP2C,YY1,ZEB1	16
Cancer, Organismal Injury and Abnormalities	lymphoreticular neoplasm	7.58E-12	CEBPB,EP300,ETS1,IKZF1,IRF4,JUN,MEF2A,MYC,NFKB1,PAX5,POU2F2,REL,RELA,SPI1,STAT1,STAT3,TAF1,ZEB1	18
Cancer, Organismal Injury and Abnormalities, Reproductive System Disease	benign neoplasm of female genital organ	7.69E-12	BRCA1,CTCF,EP300,FOS,FOXA2,GATA3,JUN,MAX,MYC,RAD21,RELA,SMC3,STAT1,TAF1,TFAP2C,ZEB1	16
Cellular Development, Cellular Growth and Proliferation	cell proliferation of cervical cancer cell lines	8.10E-12	CTCF,EP300,ETS1,FOS,IRF1,MYC,RELA,STAT3,TFAP2A,TFAP2C,YY1,ZBTB7A	12
Cell Death and Survival	cell death of myeloma cell lines	1.13E-11	IRF4,JUN,NFKB1,REL,RELA,RELB,SP1,SPI1,STAT3	9
Cancer, Organismal Injury and Abnormalities, Reproductive System Disease	HER2 negative hormone receptor negative breast cancer	1.27E-11	BRCA1,EGR1,ETS1,FOS,GATA1,IRF1,JUN,MYB,MYC,SPI1,STAT1	11
Cell Cycle	cell cycle progression	2.00E-11	BRCA1,CEBPB,ETS1,FOS,FOXA1,GATA2,GATA3,IRF1,MYC,POU5F1,RAD21,REL,RELA,SMC3,STAT1,STAT3,TAF1,TCF7L2,TFE3	19
Cellular Growth and Proliferation	colony formation of tumor cell lines	2.66E-11	BRCA1,CTCF,ETS1,FOS,IRF3,JUN,MYC,RELA,SP1,STAT3,TCF7L2,USF2,ZEB1	13
Cellular Movement	invasion of cells	3.04E-11	BRCA1,CEBPB,EGR1,ETS1,FOS,FOXA1,JUN,LEF1,MYC,RELA,SP1,STAT1,STAT3,TCF12,TFAP2A,TFAP2C,YY1,ZBTB7A,ZEB1	19
Cellular Movement	invasion of tumor cell lines	5.80E-11	BRCA1,CEBPB,EGR1,ETS1,FOXA1,JUN,LEF1,MYC,RELA,SP1,STAT1,STAT3,TCF12,TFAP2A,TFAP2C,YY1,ZBTB7A,ZEB1	18
Cancer, Hematological Disease, Immunological Disease, Organismal Injury and Abnormalities	hematological neoplasia	5.96E-11	CEBPB,CTCF,EBF1,ELF1,EP300,ETS1,GATA1,GATA2,GATA3,IKZF1,IRF1,IRF4,JUN,LEF1,MAX,MEF2A,MYB,MYC,NFKB1,PAX4,PAX5,POU2F2,RAD21,REL,RELA,SMC3,SP1,SPI1,STAT1,STAT3,TAF1,TBP,ZEB1	33
Cancer, Hematological Disease, Immunological Disease, Organismal Injury and Abnormalities	lymphocytic cancer	7.81E-11	CEBPB,EP300,ETS1,IKZF1,IRF4,JUN,MEF2A,MYC,NFKB1,PAX5,POU2F2,RELA,SPI1,STAT1,STAT3,TAF1,ZEB1	17
Cellular Movement	migration of breast cancer cell lines	8.99E-11	BRCA1,ETS1,FOXA1,GATA3,JUN,MYC,RELA,SP1,STAT3,TFAP2A,TFAP2C,ZEB1	12
Cancer, Hematological Disease, Immunological Disease, Organismal Injury and Abnormalities	lymphoid cancer	1.46E-10	CEBPB,CTCF,EBF1,ELF1,EP300,ETS1,GATA1,GATA2,GATA3,IKZF1,IRF1,IRF4,JUN,LEF1,MEF2A,MYB,MYC,NFKB1,PAX4,PAX5,POU2F2,RAD21,REL,RELA,SMC3,SPI1,STAT1,STAT3,TAF1,TBP,ZEB1	31
Cancer, Hematological Disease, Immunological Disease, Organismal Injury and Abnormalities	T-cell leukemia	1.68E-10	EP300,GATA3,IKZF1,IRF4,LEF1,MYB,PAX5,REL,STAT3	9
Cancer, Hematological Disease, Immunological Disease, Organismal Injury and Abnormalities	hematologic cancer	1.70E-10	CEBPB,CTCF,EBF1,ELF1,EP300,ETS1,GATA1,GATA2,GATA3,IKZF1,IRF1,IRF4,JUN,LEF1,MAX,MEF2A,MYB,MYC,NFKB1,PAX4,PAX5,POU2F2,RAD21,REL,RELA,SMC3,SPI1,STAT1,STAT3,TAF1,TBP,ZEB1	32
Cellular Development, Hematological System Development and Function, Hematopoiesis, Tissue Development	differentiation of erythroid progenitor cells	1.91E-10	CTCF,GATA1,IRF1,MAX,MYB,MYC,SPI1	7
Cellular Development, Hematological System Development and Function, Hematopoiesis	differentiation of hematopoietic progenitor cells	2.42E-10	CTCF,GATA1,GATA2,IRF1,MAFK,MAX,MYB,MYC,SPI1	9
Cancer, Organismal Injury and Abnormalities, Renal and Urological Disease	transitional cell bladder cancer	2.59E-10	BRCA1,CTCF,EP300,FOXA1,FOXA2,GATA3,RAD21,SMC3,TAF1	9
Cancer	cell transformation	2.98E-10	BRCA1,CEBPB,EP300,MAX,MYC,REL,RELA,STAT3,TBP	9
Cell Death and Survival	cell death of breast cancer cell lines	3.92E-10	BRCA1,CEBPB,CTCF,EP300,IRF1,JUN,POU5F1,RELA,SP1,STAT1,STAT3,TFAP2A,TFAP2C	13
Cellular Development	differentiation of leukemia cell lines	3.92E-10	CEBPB,CTCF,MAX,MYB,MYC,POU5F1,SPI1,STAT1,STAT3	9
Cancer, Organismal Injury and Abnormalities, Reproductive System Disease	breast or ovarian cancer	4.23E-10	BRCA1,CEBPB,CTCF,EGR1,EP300,ETS1,FOS,FOXA1,FOXA2,GATA1,GATA3,IRF1,JUN,MAX,MYB,MYC,NFE2L1,PAX5,POLR2A,POU5F1,RAD21,REL,RELA,RELB,RFX5,SMC3,SPI1,STAT1,STAT2,STAT3,TAF1,TBP,TFAP2C,TFE3,YY1,ZEB1	36
Cellular Development, Cellular Growth and Proliferation	cell proliferation of lymphoma cell lines	5.12E-10	IKZF1,IRF1,IRF4,JUN,MAX,MYC,REL,STAT1,STAT2	9
Cell Death and Survival	apoptosis of sarcoma cell lines	9.17E-10	BRCA1,ETS1,IRF1,IRF3,JUN,MYC,REL,RELA,STAT1,STAT2	10
Cell Death and Survival	apoptosis of lymphoma cell lines	2.15E-09	EBF1,JUN,MYC,NFKB1,RELA,SPI1,STAT1,STAT2,STAT3	9
Organismal Injury and Abnormalities, Reproductive System Disease	endometriosis	3.77E-09	BRCA1,CEBPB,EGR1,FOS,GATA3,JUN,MEF2A,NFKB1,REL,RELA,RELB,TFAP2A,USF2	13
Cancer, Hematological Disease, Immunological Disease, Organismal Injury and Abnormalities	non-Hodgkin's disease	7.21E-09	CEBPB,EP300,ETS1,IKZF1,IRF4,JUN,MEF2A,MYC,PAX5,POU2F2,STAT1,STAT3,TAF1,ZEB1	14
Cancer, Organismal Injury and Abnormalities	adenoma	7.53E-09	BRCA1,CTCF,EP300,FOXA2,GATA3,LEF1,MYC,RAD21,SMC3,STAT1,STAT3,TAF1,TCF12	13
Hematological Disease, Immunological Disease	T-cell lymphoproliferative disorder	7.81E-09	EP300,GATA3,IKZF1,IRF4,LEF1,MYB,MYC,PAX5,REL,STAT3,ZEB1	11
Cancer, Hematological Disease, Immunological Disease, Organismal Injury and Abnormalities	neoplasia of leukocytes	1.31E-08	EP300,GATA3,IKZF1,IRF4,LEF1,MYB,MYC,PAX5,REL,STAT3,ZEB1	11
Gene Expression	repression of RNA	1.89E-08	BRCA1,JUN,MAX,RELA,STAT3,TAF1,USF2	7
Cancer, Organismal Injury and Abnormalities	serous neoplasm	1.96E-08	BRCA1,CTCF,EP300,FOXA2,GATA3,MEF2C,RAD21,SMC3,STAT1,STAT2,STAT3,TAF1,TBP,TFAP2A,ZEB1	15
Infectious Diseases	replication of virus	2.50E-08	IRF1,IRF3,JUN,MAFK,MYC,NFKB1,POLR2A,RELA,STAT1,STAT2,STAT3,TFE3,ZEB1	13
Cancer, Hematological Disease, Immunological Disease, Organismal Injury and Abnormalities	large-cell lymphoma	3.03E-08	CEBPB,ETS1,IKZF1,JUN,MYC,PAX5,POU2F2,STAT1,STAT3	9
Cancer, Hematological Disease, Immunological Disease, Organismal Injury and Abnormalities	myelodysplastic syndrome	3.03E-08	EP300,GATA1,GATA2,IKZF1,MYC,NFKB1,RAD21,SMC3,STAT3	9
Cell Death and Survival	cell death of breast cell lines	3.03E-08	BRCA1,CEBPB,IRF1,MYC,RELA,ZEB1	6
Cancer, Organismal Injury and Abnormalities, Reproductive System Disease	female genital tract serous cancer	3.27E-08	BRCA1,CTCF,EP300,FOXA2,GATA3,MEF2C,RAD21,SMC3,STAT1,TAF1,TFAP2A,ZEB1	12
Hematological System Development and Function, Hematopoiesis	development of hematopoietic system	3.73E-08	IKZF1,IRF1,NFKB1,PAX5,SPI1,STAT3	6
Cancer, Organismal Injury and Abnormalities, Respiratory Disease	lung cancer	4.43E-08	BRCA1,CTCF,EGR1,EP300,FOXA1,GATA3,IRF1,JUN,MAX,MYC,NFKB1,POLR2A,POU2F2,POU5F1,RAD21,REST,SMC3,STAT1,STAT3,TAF1,TBP	21
Cancer, Endocrine System Disorders, Organismal Injury and Abnormalities, Reproductive System Disease	serous ovarian carcinoma	4.63E-08	BRCA1,CTCF,EP300,FOXA2,GATA3,RAD21,SMC3,STAT1,TAF1	9
Cancer, Organismal Injury and Abnormalities, Respiratory Disease	carcinoma in lung	4.66E-08	BRCA1,CTCF,EGR1,EP300,FOXA1,GATA3,IRF1,MAX,MYC,NFKB1,POLR2A,POU2F2,POU5F1,RAD21,REST,SMC3,STAT1,STAT3,TAF1,TBP	20
Cancer, Hematological Disease, Immunological Disease, Organismal Injury and Abnormalities	lymphocytic leukemia	5.15E-08	EBF1,EP300,GATA3,IKZF1,IRF4,LEF1,MYB,MYC,PAX4,PAX5,REL,RELA,STAT3,TBP	14
Cell Death and Survival	cell viability of tumor cell lines	5.82E-08	BRCA1,CEBPB,EP300,GATA2,JUN,LEF1,MYB,MYC,NFKB1,POU5F1,RAD21,REL,RELA,RELB,REST,STAT3	16
Cellular Development, Cellular Growth and Proliferation, Reproductive System Development and Function	cell proliferation of breast cell lines	6.08E-08	BRCA1,CEBPB,MYC,RELA,RELB,SP1,STAT3	7
Cancer, Organismal Injury and Abnormalities, Reproductive System Disease	endometrioid endometrial cancer	6.26E-08	BRCA1,CTCF,EP300,FOXA2,GATA3,RAD21,SMC3,TAF1	8
Tissue Development	development of connective tissue	6.47E-08	GATA1,IRF1,MYC,NFKB1,POU5F1,SPI1,STAT1	7
Cellular Development, Hematological System Development and Function, Hematopoiesis	differentiation of leukocytes	8.85E-08	GATA2,GATA3,IKZF1,JUN,LEF1,MYB,MYC,SPI1,STAT3	9
Cancer, Organismal Injury and Abnormalities	serous adenocarcinoma	1.09E-07	BRCA1,CTCF,EP300,FOXA2,GATA3,RAD21,SMC3,STAT1,STAT2,STAT3,TAF1,TBP	12
Cell Cycle, Reproductive System Development and Function	G1/S phase transition of breast cell lines	1.26E-07	EP300,LEF1,MYC	3
Gene Expression	binding of E box motif	1.28E-07	MAX,MYC,USF1,USF2	4
Tissue Morphology	quantity of cells	1.36E-07	BRCA1,FOXA2,GATA2,GATA3,JUN,MYB,MYC,POU5F1,STAT3,ZBTB7A	10
Cancer, Organismal Injury and Abnormalities, Reproductive System Disease	breast adenocarcinoma	1.60E-07	BRCA1,CTCF,EP300,FOS,FOXA1,GATA1,GATA3,RAD21,SMC3,TAF1	10
Cancer, Organismal Injury and Abnormalities	liquid tumor	1.60E-07	CTCF,EBF1,ELF1,EP300,GATA1,GATA2,GATA3,IKZF1,IRF1,IRF4,JUN,LEF1,MYB,MYC,NFKB1,PAX4,PAX5,RAD21,REL,RELA,SMC3,SPI1,STAT1,STAT3,TBP	25
Cancer, Organismal Injury and Abnormalities, Respiratory Disease	non-small cell lung cancer	1.62E-07	BRCA1,CTCF,EGR1,EP300,FOXA1,GATA3,IRF1,MYC,NFKB1,POLR2A,POU2F2,POU5F1,RAD21,REST,SMC3,STAT1,STAT3,TAF1,TBP	19
Cellular Growth and Proliferation, Tissue Development	generation of cells	1.66E-07	GATA1,GATA2,GATA3,IKZF1,IRF1,MYC,NFKB1,PAX5,POU5F1,SPI1,STAT1,STAT3,TFAP2A	13
Cell Death and Survival	apoptosis of myeloma cell lines	1.69E-07	IRF4,JUN,RELA,RELB,SP1,STAT3	6
Cancer, Cardiovascular Disease, Organismal Injury and Abnormalities	hemangioblastoma	1.87E-07	BRCA1,FOXA1,GATA2,MYB,MYC,NFKB1,PAX5,RAD21,SMC3,STAT3	10
Cell Death and Survival	cell viability	1.96E-07	BRCA1,CEBPB,EP300,GATA2,JUN,LEF1,MYB,MYC,NFKB1,POU5F1,RAD21,REL,RELA,RELB,REST,STAT2,STAT3	17
Cell Death and Survival	apoptosis of prostate cancer cell lines	2.49E-07	BRCA1,EGR1,FOS,JUN,MYC,RELA,STAT3,YY1	8
Cellular Growth and Proliferation	arrest in proliferation of cells	2.61E-07	BRCA1,EGR1,IRF1,MYC,SPI1,STAT1,STAT3	7
Cancer, Organismal Injury and Abnormalities	breast or colorectal cancer	2.77E-07	BATF,BRCA1,CEBPB,CTCF,EGR1,EP300,ETS1,FOS,FOXA1,FOXA2,GATA1,GATA3,IKZF1,IRF1,JUN,LEF1,MAX,MEF2C,MYB,MYC,NFE2L1,PAX5,POLR2A,POU5F1,RAD21,REL,RELA,RELB,REST,RFX5,SMC3,SPI1,STAT1,STAT2,STAT3,TAF1,TCF12,TCF7L2,TFE3,USF1,YY1,ZEB1	42
Cancer, Hematological Disease, Immunological Disease, Organismal Injury and Abnormalities	precursor T-cell lymphoblastic leukemia-lymphoma	2.85E-07	EP300,GATA3,IKZF1,LEF1,MYB,PAX5	6
Cellular Development, Cellular Growth and Proliferation	cell proliferation of brain cancer cell lines	3.01E-07	EGR1,ETS1,LEF1,MAX,MYC,RELA,REST,STAT3	8
Cancer, Hematological Disease, Immunological Disease, Organismal Injury and Abnormalities	leukemia	3.43E-07	CTCF,EBF1,ELF1,EP300,GATA1,GATA2,GATA3,IKZF1,IRF1,IRF4,JUN,LEF1,MYB,MYC,PAX4,PAX5,RAD21,REL,RELA,SMC3,SPI1,STAT1,STAT3,TBP	24
Cancer, Hematological Disease, Immunological Disease, Organismal Injury and Abnormalities	chronic leukemia	3.68E-07	EBF1,GATA2,IKZF1,IRF4,JUN,MYC,PAX4,RAD21,RELA,SPI1,STAT3,TBP	12
Cell Cycle	interphase	4.79E-07	BRCA1,EP300,ETS1,JUN,LEF1,MYB,MYC,POLR2A,SP1,SPI1,STAT1,STAT3	12
Cellular Development, Cellular Growth and Proliferation	proliferation of leukemia cell lines	4.96E-07	CEBPB,CTCF,JUN,MYB,MYC,NFKB1,RAD21,STAT3	8
Cancer, Organismal Injury and Abnormalities, Renal and Urological Disease	bladder cancer	5.23E-07	BRCA1,CTCF,EP300,FOS,FOXA1,FOXA2,GATA3,JUN,RAD21,RELA,SMC3,STAT3,TAF1	13
Cancer, Hematological Disease, Immunological Disease, Organismal Injury and Abnormalities	ALK fusion positive anaplastic large cell lymphoma	5.53E-07	CEBPB,IKZF1,JUN,STAT1	4
Cellular Development, Hematological System Development and Function, Hematopoiesis	differentiation of myeloid cells	5.56E-07	GATA2,JUN,LEF1,MYB,MYC,SPI1,STAT3	7
Cancer, Hematological Disease, Immunological Disease, Organismal Injury and Abnormalities	acute lymphocytic leukemia	8.70E-07	EBF1,EP300,GATA3,IKZF1,LEF1,MYB,MYC,PAX5	8
Infectious Diseases	replication of RNA virus	8.84E-07	IRF1,IRF3,JUN,MYC,NFKB1,POLR2A,RELA,STAT1,STAT2,STAT3,TFE3	11
Cellular Growth and Proliferation	colony formation of cervical cancer cell lines	9.75E-07	CTCF,FOS,IRF3,USF2	4
Cell Death and Survival	cell death of hematopoietic cell lines	1.07E-06	IRF4,JUN,MYC,RELA,STAT3,YY1	6
Gene Expression	binding of Ets element	1.09E-06	ETS1,MYC,POU5F1	3
Cellular Development, Cellular Growth and Proliferation, Hematological System Development and Function, Hematopoiesis, Tissue Development	development of blood cells	1.14E-06	GATA1,GATA2,GATA3,IKZF1,IRF1,SPI1,STAT3	7

## Sheet: II
© 2000-2016 QIAGEN. All rights reserved.
Categories	Diseases or Functions Annotation	p-Value	Molecules	# Molecules
Gene Expression	transcription of RNA	3.51E-17	BCL11A,BCL3,CTCFL,E2F6,GFI1,MAZ,NFAT5,NFATC1,NFATC2,NFATC3,NFATC4,NFIA,NKX2-1,SIN3A,SRF,TBX5,TRIM28	17
Gene Expression	transcription of DNA	9.41E-17	BCL11A,BCL3,CTCFL,E2F6,GFI1,NFAT5,NFATC1,NFATC2,NFATC3,NFATC4,NFIA,NKX2-1,SIN3A,SRF,TBX5,TRIM28	16
Gene Expression	activation of DNA endogenous promoter	1.50E-13	BCL11A,CTCFL,E2F6,GFI1,NFAT5,NFATC1,NFATC3,NFATC4,NFIA,NKX2-1,SIN3A,SRF,TBX5	13
Gene Expression	transactivation of RNA	1.51E-07	CTCFL,E2F6,GFI1,NFATC1,NFATC2,SRF,TBX5	7
Cell Death and Survival	activation-induced cell death	2.78E-04	GFI1,NFATC1	2
Cellular Growth and Proliferation	proliferation of cells	3.90E-04	BCL3,GFI1,NFATC1,NFATC2,NFATC3,NFATC4,NKX2-1,SRF,TBX5,TRIM28	10
Hematological Disease, Immunological Disease	hypereosinophilia	3.96E-04	NFATC1,NFATC3	2
Cancer, Organismal Injury and Abnormalities	head and neck neoplasia	7.32E-04	BCL11A,CTCFL,MAZ,NFATC1,NFATC3,NFATC4,NKX2-1,NOBOX,SIN3A,SRF,TRIM28	11
Cancer, Endocrine System Disorders, Organismal Injury and Abnormalities	nonmedullary thyroid cancer type 1	9.58E-04	NKX2-1	1
Cardiovascular Disease, Developmental Disorder, Hereditary Disorder, Organismal Injury and Abnormalities, Skeletal and Muscular Disorders	familial Holt-Oram syndrome	9.58E-04	TBX5	1
Cardiovascular System Development and Function, Embryonic Development, Organ Development, Organismal Development, Tissue Development	development of pericardium	9.58E-04	TBX5	1
Developmental Disorder, Endocrine System Disorders, Metabolic Disease, Neurological Disease, Psychological Disorders	congenital hypothyroidism with choreoathetosis and neonatal resporatory distress	9.58E-04	NKX2-1	1
Developmental Disorder, Hematological Disease, Hereditary Disorder, Immunological Disease, Organismal Injury and Abnormalities	autosomal dominant severe congenital neutropenia type 2	9.58E-04	GFI1	1
Embryonic Development, Nervous System Development and Function, Organ Development, Organismal Development, Tissue Development	development of globus pallidus	9.58E-04	NKX2-1	1
Endocrine System Disorders, Hereditary Disorder, Organismal Injury and Abnormalities, Reproductive System Disease	premature ovarian failure type 5	9.58E-04	NOBOX	1
Endocrine System Disorders, Neurological Disease, Respiratory Disease	brain-lung-thyroid syndrome	9.58E-04	NKX2-1	1
Hematological Disease, Hereditary Disorder, Organismal Injury and Abnormalities	heterocellular hereditary persistence of fetal hemoglobin	9.58E-04	BCL11A	1
Hematological Disease, Immunological Disease	adult nonimmune chronic idiopathic neutropenia	9.58E-04	GFI1	1
Hereditary Disorder, Neurological Disease, Organismal Injury and Abnormalities	benign hereditary chorea	9.58E-04	NKX2-1	1
Infectious Diseases	proliferation of HIV	9.58E-04	NFATC1	1
Cellular Development, Embryonic Development, Organismal Development, Tissue Development	differentiation of embryonic tissue	1.16E-03	SRF,TBX5	2
Cellular Development, Cellular Growth and Proliferation	cell proliferation of tumor cell lines	1.47E-03	BCL3,GFI1,NFATC2,NFATC4,SRF,TBX5,TRIM28	7
Cancer, Organismal Injury and Abnormalities, Reproductive System Disease	progressive breast cancer	1.92E-03	NFATC2	1
Cell Death and Survival	cell survival of adenocarcinoma cell lines	1.92E-03	NKX2-1	1
Cell Morphology, Skeletal and Muscular System Development and Function	hypercontractility of vascular smooth muscle cells	1.92E-03	SRF	1
Cellular Development, Cellular Growth and Proliferation, Hematological System Development and Function, Hematopoiesis, Tissue Development	proliferation of lymphoblasts	1.92E-03	NFATC3	1
Cellular Development, Embryonic Development, Organismal Development, Tissue Development	differentiation of trophectoderm cells	1.92E-03	SRF	1
Metabolic Disease	AA amyloidosis	1.92E-03	MAZ	1
Metabolic Disease	hyperthyrotropinemia	1.92E-03	NKX2-1	1
Respiratory Disease	respiratory distress syndrome of the newborn	1.92E-03	NKX2-1	1
Cellular Development, Cellular Growth and Proliferation, Hematological System Development and Function	proliferation of lymphocytes	2.13E-03	NFATC2,NFATC3,SRF	3
Cellular Movement	invasion of melanoma cell lines	2.31E-03	NFAT5,NFATC2	2
Cardiovascular System Development and Function, Cellular Development, Embryonic Development, Organismal Development, Tissue Development	differentiation of heart precursor cells	2.87E-03	TBX5	1
Cellular Assembly and Organization, Cellular Function and Maintenance	organization of cellular protrusions	2.87E-03	SRF	1
Cellular Movement	invasion of colorectal cancer cell lines	2.95E-03	NFAT5,NFATC2	2
Cardiovascular System Development and Function, Cellular Development, Cellular Growth and Proliferation, Embryonic Development, Organ Development, Organismal Development, Skeletal and Muscular System Development and Function, Tissue Development	proliferation of cardiomyocytes	3.83E-03	TBX5	1
Cellular Development, Cellular Growth and Proliferation, Connective Tissue Development and Function, Skeletal and Muscular System Development and Function, Tissue Development	osteoclastogenesis of osteoclast precursor cells	3.83E-03	NFATC4	1
Embryonic Development, Organismal Development, Skeletal and Muscular System Development and Function	morphogenesis of embryonic forelimb	3.83E-03	TBX5	1
Metabolic Disease	amyloidosis	4.45E-03	MAZ,NFATC2,NFATC4,SRF	4
Cell Morphology, Cellular Assembly and Organization, Cellular Function and Maintenance	reorganization of actin stress fibers	4.78E-03	SRF	1
Tissue Development	development of connective tissue	4.89E-03	NFATC4,TBX5	2
Hereditary Disorder, Organismal Injury and Abnormalities	autosomal dominant disease	5.09E-03	BCL11A,GFI1,NOBOX,TBX5	4
Embryonic Development, Endocrine System Development and Function, Organ Development, Organismal Development, Tissue Development	thyroid gland development	5.74E-03	NKX2-1	1
Cancer, Endocrine System Disorders, Organismal Injury and Abnormalities	thyroid gland tumor	6.34E-03	CTCFL,MAZ,NFATC1,NFATC4,NKX2-1,SRF	6
Cellular Development, Cellular Growth and Proliferation, Organ Development, Skeletal and Muscular System Development and Function, Tissue Development	proliferation of muscle cells	6.36E-03	NFATC1,TBX5	2
Developmental Disorder, Endocrine System Disorders, Hereditary Disorder, Metabolic Disease, Organismal Injury and Abnormalities	hereditary congenital hypothyroidism	6.69E-03	NKX2-1	1
DNA Replication Recombination and Repair, Gene Expression	silencing of chromatin	7.64E-03	SIN3A	1
Cancer, Endocrine System Disorders, Organismal Injury and Abnormalities	nonmedullary thyroid cancer	7.91E-03	NKX2-1,SRF	2
Cellular Development, Cellular Growth and Proliferation, Nervous System Development and Function, Tissue Development	development of neurons	8.23E-03	BCL11A,SRF	2
Cell Death and Survival	activation-induced cell death of leukemia cell lines	9.54E-03	GFI1	1
Cellular Development, Skeletal and Muscular System Development and Function, Tissue Development	differentiation of smooth muscle cells	9.54E-03	SRF	1
Post-Translational Modification	deacetylation of protein	9.54E-03	SIN3A	1
Cancer, Organismal Injury and Abnormalities	abdominal adenocarcinoma	1.02E-02	BCL11A,CTCFL,E2F6,GFI1,MAZ,NFAT5,NFATC1,NFATC2,NFATC3,NFATC4,NFIA,NKX2-1,SIN3A,TBX5	14
Cell Death and Survival	cell viability of fibrosarcoma cell lines	1.05E-02	TRIM28	1
Cancer, Organismal Injury and Abnormalities	solid tumor of head and neck	1.14E-02	BCL11A,NFATC1,NFATC3,NKX2-1,NOBOX,SIN3A,SRF,TRIM28	8
Cellular Development	epithelial-mesenchymal transition of lung cancer cell lines	1.14E-02	NKX2-1	1
Cellular Development, Cellular Growth and Proliferation	cell proliferation of breast cancer cell lines	1.27E-02	NFATC2,NFATC4,TRIM28	3
Cancer, Organismal Injury and Abnormalities	head and neck carcinoma	1.30E-02	NFATC1,NFATC3,NKX2-1,NOBOX,SIN3A,SRF,TRIM28	7
Cell Death and Survival	cell death	1.34E-02	BCL3,E2F6,GFI1,NFATC1,NFATC2,NKX2-1,TRIM28	7
Cell Cycle	arrest in G1 phase of leukemia cell lines	1.43E-02	GFI1	1
Cell Cycle, Hair and Skin Development and Function	G1 phase of epithelial cell lines	1.43E-02	BCL3	1
Cell Death and Survival	apoptosis	1.43E-02	BCL3,E2F6,GFI1,NFATC1,NFATC2,TRIM28	6
Cell Death and Survival, Hematological Disease, Immunological Disease	activation-induced cell death of T lymphocytes	1.43E-02	NFATC1	1
Post-Translational Modification	sumoylation of protein	1.43E-02	TRIM28	1
Cell Morphology, Cellular Assembly and Organization, Cellular Function and Maintenance, Nervous System Development and Function	extension of axons	1.52E-02	BCL11A	1
Antimicrobial Response, Inflammatory Response	antiviral response	1.56E-02	BCL3,SIN3A	2
DNA Replication Recombination and Repair	DNA damage response of cells	1.57E-02	BCL3,NFATC2	2
Cell Death and Survival	cell survival of lung cancer cell lines	1.81E-02	NKX2-1	1
Skeletal and Muscular System Development and Function	contraction of smooth muscle	1.90E-02	SRF	1
Cell Death and Survival	necrosis	1.96E-02	BCL3,E2F6,GFI1,NFATC1,NKX2-1,TRIM28	6
Cell Morphology, Cellular Assembly and Organization, Cellular Development, Cellular Function and Maintenance, Cellular Growth and Proliferation, Nervous System Development and Function, Tissue Development	formation of dendrites	1.99E-02	BCL11A	1
Cancer, Organismal Injury and Abnormalities	breast or ovarian carcinoma	2.09E-02	MAZ,NFAT5,NFATC4,NOBOX,SIN3A	5
Cellular Development	epithelial-mesenchymal transition of carcinoma cell lines	2.18E-02	NKX2-1	1
Cellular Assembly and Organization, Tissue Development	formation of tubules	2.28E-02	MAZ	1
Connective Tissue Development and Function, Skeletal and Muscular System Development and Function	resorption of bone	2.28E-02	NFATC4	1
Cancer, Gastrointestinal Disease, Organismal Injury and Abnormalities	gastrointestinal adenocarcinoma	2.32E-02	BCL11A,CTCFL,E2F6,GFI1,MAZ,NFATC2,NFATC3,NFATC4,NFIA,NKX2-1,SIN3A	11
Cancer, Organismal Injury and Abnormalities	breast or colorectal cancer	2.34E-02	BCL11A,CTCFL,E2F6,GFI1,MAZ,NFATC2,NFATC3,NFATC4,NFIA,NKX2-1,NOBOX,SIN3A	12
Cellular Growth and Proliferation, Tissue Development	generation of cells	2.40E-02	BCL11A,NFATC4,SRF	3
Cancer, Organismal Injury and Abnormalities	squamous-cell carcinoma	2.42E-02	BCL11A,CTCFL,NFATC1,NFATC3,NKX2-1,NOBOX,SIN3A,TRIM28	8
Cancer, Organismal Injury and Abnormalities, Reproductive System Disease	carcinoma in breast	2.64E-02	MAZ,NFATC4,NOBOX,SIN3A	4
Cellular Movement	invasion of breast cancer cell lines	2.67E-02	NFAT5,NFATC2	2
Cell Death and Survival	cell death of thyroid tumor cell lines	2.74E-02	NKX2-1	1
Metabolic Disease, Neurological Disease, Psychological Disorders	Alzheimer's disease	2.75E-02	NFATC2,NFATC4,SRF	3
Cancer, Gastrointestinal Disease, Organismal Injury and Abnormalities	colorectal carcinoma	2.88E-02	BCL11A,CTCFL,E2F6,GFI1,MAZ,NFATC3,NFATC4,NFIA,NKX2-1,SIN3A	10
Cellular Development, Cellular Growth and Proliferation, Hematological System Development and Function	expansion of T lymphocytes	2.93E-02	SRF	1
Cancer, Organismal Injury and Abnormalities	breast or ovarian cancer	2.99E-02	MAZ,NFAT5,NFATC2,NFATC4,NOBOX,SIN3A	6
Cell Death and Survival	apoptosis of keratinocyte cancer cell lines	3.02E-02	BCL3	1
Gene Expression	initiation of transcription of RNA	3.12E-02	MAZ	1
Cancer, Organismal Injury and Abnormalities	head and neck squamous cell cancer	3.22E-02	NFATC1,NFATC3,NKX2-1,NOBOX,SIN3A,TRIM28	6
Molecular Transport, Protein Trafficking	nuclear transport of protein	3.30E-02	BCL3	1
Cancer, Organismal Injury and Abnormalities, Reproductive System Disease	breast cancer	3.66E-02	MAZ,NFATC2,NFATC4,NOBOX,SIN3A	5
Cellular Movement, Skeletal and Muscular System Development and Function	migration of vascular smooth muscle cells	3.67E-02	NFATC1	1
Cell Cycle	G1 phase	3.68E-02	BCL3,GFI1	2
Cellular Movement	invasion of tumor cell lines	3.96E-02	NFAT5,NFATC2,NKX2-1	3
Cancer, Organismal Injury and Abnormalities	cancer of secretory structure	4.21E-02	NFATC1,NFATC2,NFATC3,NFIA,NKX2-1,NOBOX,SIN3A,SRF	8
Cellular Development, Cellular Growth and Proliferation, Respiratory System Development and Function	proliferation of lung cell lines	4.50E-02	NKX2-1	1
Cell Death and Survival	apoptosis of fibrosarcoma cell lines	4.59E-02	TRIM28	1
Cancer, Neurological Disease, Organismal Injury and Abnormalities	glioblastoma cancer	4.60E-02	MAZ,SIN3A	2
Inflammatory Response	inflammatory response	4.74E-02	NFATC3,NFATC4	2
Cellular Movement	migration of cells	4.75E-02	NFATC1,NFATC3,NKX2-1,TBX5	4
Cardiovascular System Development and Function, Cellular Development, Cellular Growth and Proliferation, Organ Development, Skeletal and Muscular System Development and Function, Tissue Development	proliferation of vascular smooth muscle cells	4.78E-02	NFATC1	1
Categories	Diseases or Functions Annotation	p-Value	Molecules	# Molecules
Gene Expression	transcription of DNA	1.19E-21	ARNT,ATF3,BCL6,CHD2,CREB1,E2F1,ESR1,FOSL2,GABPA,HDAC2,HEY1,HNF4A,LMO2,NFYA,NFYB,NR3C1,PRDM1,RXRA,TAL1,TCF3,WT1,ZNF263	22
Gene Expression	transcription of RNA	1.37E-19	ARNT,ATF3,BCL6,CHD2,CREB1,E2F1,ESR1,FOSL2,GABPA,HDAC2,HEY1,HNF4A,LMO2,NFYA,NFYB,NR3C1,PRDM1,RXRA,TAL1,TCF3,WT1,ZNF263	22
Gene Expression	activation of DNA endogenous promoter	2.02E-19	ATF3,BCL6,CHD2,CREB1,E2F1,ESR1,FOSL2,GABPA,HDAC2,HEY1,HNF4A,LMO2,NFYA,NR3C1,PRDM1,RXRA,TAL1,TCF3,WT1	19
Gene Expression	binding of DNA	6.38E-11	CREB1,E2F1,ESR1,HEY1,HNF4A,NFYA,NR3C1,PRDM1,RXRA,TAL1	10
Gene Expression	transactivation of RNA	3.37E-10	BCL6,E2F1,ESR1,GABPA,HNF4A,LMO2,NR3C1,RXRA,TCF3,WT1	10
Cancer, Organismal Injury and Abnormalities, Reproductive System Disease	estrogen receptor-negative breast cancer	5.82E-09	BCL6,ESR1,FOSL2,LMO2,PRDM1,TAL1,WT1	7
Cancer, Cardiovascular Disease, Organismal Injury and Abnormalities	vascular tumor	6.43E-09	ARNT,BCL6,ESR1,LMO2,NR3C1,PRDM1,RXRA,TCF3,WT1	9
Cellular Development, Cellular Growth and Proliferation	cell proliferation of tumor cell lines	4.79E-08	ATF3,BCL6,CREB1,E2F1,ESR1,HDAC2,HNF4A,NR3C1,PRDM1,RXRA,SETDB1,TAL1,TCF3,WT1	14
Cancer, Cardiovascular Disease, Organismal Injury and Abnormalities	hemangioma	7.67E-08	ARNT,BCL6,ESR1,LMO2,NR3C1,PRDM1,TCF3,WT1	8
Cell Cycle	cell cycle progression	1.17E-07	ATF3,BCL6,CCNT2,E2F1,ESR1,FOSL2,NR3C1,TAL1,TCF3,WT1	10
Cancer, Organismal Injury and Abnormalities, Reproductive System Disease	HER2 negative hormone receptor negative breast cancer	1.54E-07	BCL6,ESR1,FOSL2,LMO2,TAL1,WT1	6
Cell Death and Survival	apoptosis of leukemia cell lines	1.98E-07	E2F1,ESR1,LMO2,NR3C1,TAL1,TCF3,WT1	7
Cell Death and Survival	apoptosis of tumor cell lines	2.28E-07	ATF3,BCL6,CREB1,E2F1,ESR1,HDAC2,LMO2,NR3C1,PRDM1,TAL1,TCF3,WT1	12
Cellular Development, Hematological System Development and Function	differentiation of blood cells	2.49E-07	BCL6,E2F1,ESR1,PRDM1,TAL1,TCF3,WT1	7
Cellular Development, Cellular Growth and Proliferation	cell proliferation of bone cancer cell lines	2.97E-07	BCL6,E2F1,ESR1,NR3C1,WT1	5
Cancer, Cardiovascular Disease, Organismal Injury and Abnormalities	hemangioblastoma	4.06E-07	ARNT,BCL6,ESR1,LMO2,PRDM1,TCF3,WT1	7
Cancer, Hematological Disease, Immunological Disease, Organismal Injury and Abnormalities	neoplasia of leukocytes	4.55E-07	HDAC2,NR3C1,PRDM1,RXRA,TAL1,TCF3,WT1	7
Cell Death and Survival	apoptosis	1.98E-06	ATF3,BCL6,CREB1,E2F1,ESR1,HDAC2,HEY1,LMO2,NR3C1,PRDM1,TAL1,TCF3,WT1	13
Cancer, Immunological Disease, Organismal Injury and Abnormalities	lymphatic node tumor	2.37E-06	BCL6,E2F1,ESR1,HDAC2,NR3C1,PRDM1,RXRA,TCF3	8
Cell Death and Survival	cell viability	2.37E-06	ATF3,BCL6,CREB1,E2F1,ESR1,HDAC2,NR3C1,RXRA,TAL1,WT1	10
Cellular Development, Cellular Growth and Proliferation	cell proliferation of sarcoma cell lines	2.47E-06	BCL6,E2F1,ESR1,NR3C1,WT1	5
Cancer, Organismal Injury and Abnormalities	benign neoplasia	2.63E-06	ARNT,BCL6,E2F1,ESR1,LMO2,NR3C1,PRDM1,RXRA,TCF3,WT1	10
Organismal Injury and Abnormalities, Reproductive System Disease	endometriosis	3.14E-06	BCL6,CREB1,ESR1,FOSL2,NR3C1,TAL1,WT1	7
Hematological Disease, Immunological Disease	T-cell lymphoproliferative disorder	5.84E-06	NR3C1,PRDM1,RXRA,TAL1,WT1	5
Cellular Development, Cellular Growth and Proliferation, Hair and Skin Development and Function	proliferation of epithelial cell lines	5.99E-06	E2F1,ESR1,HNF4A,RXRA,WT1	5
Cell Death and Survival	cell death	6.10E-06	ATF3,BCL6,CREB1,E2F1,ESR1,FOSL2,HDAC2,HEY1,LMO2,NR3C1,PRDM1,TAL1,TCF3,WT1	14
Cellular Growth and Proliferation	proliferation of cells	7.19E-06	ATF3,BCL6,CREB1,E2F1,ESR1,HDAC2,HEY1,HNF4A,NR3C1,PRDM1,RXRA,SETDB1,TAL1,TCF3,WT1	15
Cancer, Organismal Injury and Abnormalities	lymphoid cancer	7.38E-06	ARNT,BCL6,CHD2,E2F1,ESR1,HDAC2,HEY1,LMO2,NR3C1,PRDM1,RXRA,TAL1,TCF3,WT1	14
Gene Expression	repression of RNA	7.74E-06	BCL6,ESR1,HDAC2,NR3C1	4
Hematological Disease, Immunological Disease	lymphoproliferative disorder	9.37E-06	BCL6,CHD2,E2F1,LMO2,NR3C1,PRDM1,RXRA,TAL1,WT1	9
Cellular Development, Cellular Growth and Proliferation	proliferation of leukemia cell lines	9.46E-06	NR3C1,PRDM1,TAL1,TCF3,WT1	5
Connective Tissue Disorders, Hematological Disease, Immunological Disease	immune thrombocytopenia	1.12E-05	ARNT,BCL6,NR3C1,TAL1	4
Cancer, Hematological Disease, Organismal Injury and Abnormalities	hematologic cancer	1.79E-05	ARNT,BCL6,CHD2,E2F1,ESR1,HDAC2,HEY1,LMO2,NR3C1,PRDM1,RXRA,TAL1,TCF3,WT1	14
Cancer, Organismal Injury and Abnormalities, Reproductive System Disease	progressive prostate carcinoma	1.84E-05	ESR1,NR3C1	2
Cellular Development, Hematological System Development and Function, Hematopoiesis	differentiation of leukocytes	1.90E-05	BCL6,PRDM1,TAL1,TCF3,WT1	5
Cancer, Hematological Disease, Immunological Disease, Organismal Injury and Abnormalities	T-cell non-Hodgkin's disease	1.94E-05	HDAC2,NR3C1,PRDM1,RXRA,TCF3	5
Cellular Growth and Proliferation	colony formation of cells	2.05E-05	ATF3,BCL6,E2F1,ESR1,SETDB1,TAL1	6
Cancer, Hematological Disease, Immunological Disease, Organismal Injury and Abnormalities	non-Hodgkin's disease	2.08E-05	BCL6,E2F1,HDAC2,NR3C1,PRDM1,RXRA,TCF3	7
Cellular Development, Cellular Growth and Proliferation, Embryonic Development	proliferation of embryonic cell lines	2.74E-05	E2F1,ESR1,HNF4A,RXRA	4
Cellular Development, Hematological System Development and Function, Hematopoiesis, Tissue Development	differentiation of megakaryocytes	2.80E-05	E2F1,ESR1,TCF3	3
Cellular Development	differentiation of cells	3.04E-05	BCL6,E2F1,ESR1,HDAC2,PRDM1,TAL1,TCF3,WT1	8
Cell Cycle	cell cycle progression of tumor cell lines	3.20E-05	BCL6,E2F1,ESR1,NR3C1,WT1	5
Cellular Growth and Proliferation	arrest in proliferation of cells	3.37E-05	E2F1,ESR1,TAL1,TCF3	4
Cellular Development, Cellular Growth and Proliferation	cell proliferation of ovarian cancer cell lines	3.57E-05	ATF3,E2F1,HDAC2,RXRA	4
Dermatological Diseases and Conditions, Inflammatory Disease, Inflammatory Response	contact dermatitis or eczema	3.66E-05	NR3C1,PRDM1,RXRA	3
Dermatological Diseases and Conditions	hand dermatosis	3.85E-05	NR3C1,RXRA	2
Dermatological Diseases and Conditions	skin manifestation	3.85E-05	HDAC2,RXRA	2
Hematological Disease, Immunological Disease	B-cell lymphoproliferative disorder	4.16E-05	BCL6,CHD2,E2F1,NR3C1,PRDM1,RXRA	6
Cancer, Hematological Disease, Immunological Disease, Organismal Injury and Abnormalities	leukemia	4.96E-05	ARNT,BCL6,CHD2,E2F1,ESR1,HDAC2,HEY1,LMO2,NR3C1,RXRA,TAL1,WT1	12
Cellular Development, Cellular Growth and Proliferation, Renal and Urological System Development and Function	cell proliferation of kidney cell lines	4.96E-05	E2F1,ESR1,HNF4A,RXRA	4
Organismal Injury and Abnormalities, Reproductive System Disease, Skeletal and Muscular Disorders	pelvic organ prolapse	5.13E-05	ESR1,NR3C1	2
Cellular Growth and Proliferation	cytostasis of tumor cell lines	5.22E-05	BCL6,ESR1,RXRA,WT1	4
Cell Death and Survival	apoptosis of bone cancer cell lines	5.93E-05	BCL6,E2F1,NR3C1,WT1	4
Cancer, Hematological Disease, Immunological Disease, Organismal Injury and Abnormalities	lymphoproliferative malignancy	5.97E-05	BCL6,CHD2,LMO2,NR3C1,PRDM1,TAL1,WT1	7
Cellular Growth and Proliferation	colony formation of tumor cell lines	6.04E-05	ATF3,BCL6,E2F1,ESR1,SETDB1	5
Cancer, Hematological Disease, Immunological Disease, Organismal Injury and Abnormalities	systemic large-cell Ki-1 lymphoma	6.55E-05	HDAC2,PRDM1,RXRA	3
Cancer, Organismal Injury and Abnormalities	breast or ovarian cancer	7.32E-05	ATF3,BCL6,E2F1,ESR1,FOSL2,HDAC2,HNF4A,LMO2,NR3C1,PRDM1,TAL1,WT1	12
Cell Morphology	conversion of connective tissue cells	8.23E-05	BCL6,SETDB1	2
Organismal Injury and Abnormalities	preterm birth or low birth weight	8.23E-05	ESR1,NR3C1	2
Cell Morphology	morphology of cells	8.30E-05	ARNT,E2F1,ESR1,HNF4A,NFYA,WT1	6
Cancer, Organismal Injury and Abnormalities, Reproductive System Disease	metastatic prostate carcinoma	1.00E-04	ESR1,NR3C1	2
Cellular Development, Cellular Growth and Proliferation	arrest in proliferation of leukemia cell lines	1.00E-04	TAL1,TCF3	2
Ophthalmic Disease, Organismal Injury and Abnormalities	diabetic macular edema	1.00E-04	ESR1,NR3C1	2
Gene Expression	binding of protein binding site	1.06E-04	E2F1,ESR1,HEY1,RXRA	4
Cancer, Organismal Injury and Abnormalities	recurrent cancer	1.15E-04	BCL6,ESR1,HDAC2,NR3C1	4
Cancer, Dermatological Diseases and Conditions, Hematological Disease, Immunological Disease, Inflammatory Disease, Inflammatory Response, Organismal Injury and Abnormalities	mycosis fungoides	1.16E-04	HDAC2,NR3C1,RXRA	3
Cancer, Hematological Disease, Immunological Disease, Organismal Injury and Abnormalities	activated B-cell-like diffuse large B-cell lymphoma	1.20E-04	BCL6,PRDM1	2
Dermatological Diseases and Conditions	alopecia areata	1.20E-04	NR3C1,RXRA	2
Cell Death and Survival	apoptosis of prostate cancer cell lines	1.49E-04	CREB1,E2F1,NR3C1,WT1	4
Respiratory Disease	bronchopathy	1.55E-04	HDAC2,HNF4A,NR3C1	3
Cell Death and Survival	apoptosis of sarcoma cell lines	1.61E-04	BCL6,E2F1,NR3C1,WT1	4
Cancer, Dermatological Diseases and Conditions, Hematological Disease, Immunological Disease, Organismal Injury and Abnormalities	sezary syndrome	1.73E-04	HDAC2,RXRA,TCF3	3
Cell Cycle	senescence of tumor cell lines	1.87E-04	E2F1,ESR1,HDAC2	3
Connective Tissue Development and Function, Tissue Morphology	quantity of connective tissue	2.01E-04	E2F1,ESR1,NR3C1	3
Cancer, Organismal Injury and Abnormalities, Reproductive System Disease	breast cancer	2.05E-04	ATF3,BCL6,E2F1,ESR1,FOSL2,LMO2,NR3C1,PRDM1,TAL1,WT1	10
Cancer, Hematological Disease, Immunological Disease, Organismal Injury and Abnormalities	precursor T-cell lymphoblastic leukemia-lymphoma	2.23E-04	NR3C1,TAL1,WT1	3
Organismal Survival	organismal death	2.23E-04	ARNT,ATF3,ESR1,HDAC2,WT1	5
Cell Death and Survival	cell viability of tumor cell lines	2.60E-04	ATF3,BCL6,CREB1,E2F1,HDAC2,NR3C1,RXRA	7
Cancer, Hematological Disease, Immunological Disease, Organismal Injury and Abnormalities	acute lymphocytic leukemia	2.69E-04	LMO2,NR3C1,TAL1,WT1	4
Cell Cycle	interphase of tumor cell lines	2.77E-04	E2F1,NFYA,RXRA,TCF3,WT1	5
Cancer, Hematological Disease, Immunological Disease, Organismal Injury and Abnormalities	refractory non-Hodgkin lymphoma	2.78E-04	BCL6,HDAC2	2
Cancer, Organismal Injury and Abnormalities	benign connective or soft tissue neoplasm	2.83E-04	ARNT,E2F1,ESR1,NR3C1,RXRA	5
Cell Cycle	G1 phase of tumor cell lines	2.87E-04	E2F1,NFYA,TCF3,WT1	4
Cancer, Hematological Disease, Immunological Disease, Organismal Injury and Abnormalities	B-cell non-Hodgkin's disease	2.98E-04	BCL6,E2F1,NR3C1,PRDM1,RXRA	5
Cancer, Hematological Disease, Organismal Injury and Abnormalities	relapsed hematologic cancer	2.99E-04	BCL6,HDAC2,NR3C1	3
Cancer, Hematological Disease, Immunological Disease, Organismal Injury and Abnormalities	large-cell lymphoma	3.11E-04	BCL6,HDAC2,PRDM1,RXRA	4
Cellular Development, Cellular Growth and Proliferation	arrest in proliferation of tumor cell lines	3.18E-04	ESR1,TAL1,TCF3	3
Cancer, Hematological Disease, Immunological Disease, Organismal Injury and Abnormalities	lymphocytic leukemia	3.41E-04	BCL6,CHD2,LMO2,NR3C1,TAL1,WT1	6
Connective Tissue Disorders, Skeletal and Muscular Disorders	osteopenia	3.45E-04	ESR1,NR3C1	2
Cell Cycle	senescence of breast cancer cell lines	3.80E-04	ESR1,HDAC2	2
Cell Morphology, Hair and Skin Development and Function	morphology of epithelial cell lines	4.18E-04	HNF4A,WT1	2
Psychological Disorders	depressive disorder	5.07E-04	BCL6,CREB1,ESR1,NR3C1	4
Cancer, Organismal Injury and Abnormalities	stage 4 advanced cancer	5.11E-04	ESR1,HDAC2,NR3C1	3
Gene Expression	binding of DNA fragment	5.42E-04	NFYA,RXRA	2
Metabolic Disease	light chain associated amyloidosis	5.42E-04	BCL6,TCF3	2
Cell Death and Survival	cell viability of lung cancer cell lines	5.65E-04	ATF3,CREB1,RXRA	3
Free Radical Scavenging, Molecular Transport	accumulation of reactive oxygen species	5.86E-04	E2F1,ESR1	2
Infectious Diseases, Organismal Injury and Abnormalities, Renal and Urological Disease	urinary tract infection	5.86E-04	ESR1,NR3C1	2
Cell Cycle	arrest in interphase of tumor cell lines	7.04E-04	E2F1,NFYA,RXRA,WT1	4
Cancer, Organismal Injury and Abnormalities	recurrent malignant solid tumor	7.16E-04	BCL6,ESR1,HDAC2	3
Embryonic Development, Organismal Development	morphogenesis of embryo	7.31E-04	HDAC2,WT1	2

## Sheet: III
© 2000-2016 QIAGEN. All rights reserved.
Categories	Diseases or Functions Annotation	p-Value	Molecules	# Molecules
Gene Expression	transcription of RNA	1.77E-30	ALX1,BACH2,BPTF,BRF1,CRX,CTBP2,E2F4,ELK4,ESRRA,ETV7,FOSL1,GTF2B,GTF3C2,HIC1,HIF1A,HNF4G,HOXA7,HSF1,NFE2,NFIL3,NKX3-1,NR5A1,NRF1,PDX1,PPARGC1A,RORA,SMAD3,SMARCA4,SMARCB1,SMARCC1,SMARCC2,SOX10,SP2,SREBF2,SRY,TAF7,TFCP2,THAP1,TP53,ZIC3,ZNF219	41
Gene Expression	transcription of DNA	7.10E-30	ALX1,BPTF,BRF1,CRX,CTBP2,E2F4,ELK4,ESRRA,ETV7,FOSL1,GTF3C2,HIC1,HIF1A,HNF4G,HOXA7,HSF1,NFE2,NFIL3,NKX3-1,NR5A1,NRF1,PPARGC1A,RORA,SMAD3,SMARCA4,SMARCB1,SMARCC1,SMARCC2,SOX10,SP2,SREBF2,SRY,TAF7,TFCP2,THAP1,TP53,ZIC3,ZNF219	38
Gene Expression	activation of DNA endogenous promoter	1.75E-26	ALX1,BPTF,CRX,CTBP2,E2F4,ELK4,ETV7,FOSL1,GTF3C2,HIC1,HIF1A,HNF4G,HOXA7,HSF1,NFE2,NFIL3,NKX3-1,NR5A1,NRF1,PPARGC1A,RORA,SMAD3,SMARCA4,SMARCB1,SOX10,SP2,SREBF2,TAF7,TFCP2,TP53,ZIC3,ZNF219	32
Cellular Compromise	disassembly of nucleosomes	8.66E-10	NFE2,SMARCA4,SMARCB1,SMARCC1,SMARCC2	5
Gene Expression	transactivation of RNA	1.27E-08	E2F4,ESRRA,HIF1A,HNF4G,PPARGC1A,RORA,SMAD3,SMARCA4,SMARCB1,SMARCC1,SOX10,TP53	12
DNA Replication Recombination and Repair	non-homologous end joining	1.29E-07	SMARCB1,SMARCC1,SMARCC2,TP53	4
Cellular Development, Cellular Growth and Proliferation	cell proliferation of tumor cell lines	1.38E-07	ALX1,CTBP2,ELK4,ESRRA,ETV7,FOSL1,HIC1,HIF1A,HOXA7,HSF1,NFE2,NKX3-1,PBX3,RORA,SIRT6,SMAD3,SMARCA4,SMARCB1,SUZ12,TAF7,TP53	21
Cell Death and Survival	cell viability of tumor cell lines	1.44E-07	ESRRA,FOSL1,HIF1A,NKX2-2,NRF1,PBX3,PPARGC1A,SMAD3,SMARCA4,SMARCB1,SMARCC1,SMARCC2,SOX10,SREBF2,TP53	15
Cell Cycle, Cellular Assembly and Organization, DNA Replication Recombination and Repair	remodeling of chromatin	2.02E-07	BPTF,SMARCA4,SMARCB1,SMARCC1,SMARCC2	5
Cell Death and Survival	cell viability	4.00E-07	ESRRA,FOSL1,HIF1A,NFIL3,NKX2-2,NRF1,PBX3,PPARGC1A,SMAD3,SMARCA4,SMARCB1,SMARCC1,SMARCC2,SOX10,SREBF2,TP53	16
Cell Death and Survival	cell viability of melanoma cell lines	7.56E-07	HIF1A,PPARGC1A,SMARCA4,SOX10,TP53	5
Cellular Development	differentiation of cells	7.62E-07	CTBP2,E2F4,ETV7,HIF1A,HOXA7,NFE2,PPARGC1A,RORA,SIRT6,SMAD3,SMARCA4,SMARCB1,SUZ12,TP53	14
Cell Cycle, DNA Replication Recombination and Repair	non-homologous end joining of DNA double strand break site	1.42E-06	SMARCB1,SMARCC1,SMARCC2	3
Cellular Growth and Proliferation	proliferation of cells	6.35E-06	ALX1,BRF1,CTBP2,E2F4,ELK4,ESRRA,ETV7,FOSL1,GTF2B,HIC1,HIF1A,HOXA7,HSF1,NFE2,NKX3-1,PBX3,RORA,SIRT6,SMAD3,SMARCA4,SMARCB1,SUZ12,TAF7,THAP1,TP53	25
Gene Expression	repression of RNA	8.65E-06	GTF2B,HIF1A,SMARCA4,SRY,TP53	5
DNA Replication Recombination and Repair	double-stranded DNA break repair	1.49E-05	SMAD3,SMARCB1,SMARCC1,SMARCC2,TP53	5
Cell Morphology	morphology of tumor cell lines	2.47E-05	FOSL1,NFE2,RORA,SMARCA4,SMARCB1,TP53	6
Cellular Function and Maintenance	metabolism of tumor cell lines	2.65E-05	HIF1A,PPARGC1A	2
Cell Death and Survival	cell survival of lung cancer cell lines	2.82E-05	HIF1A,NKX2-2,TP53	3
Cell Death and Survival	cell viability of bone cancer cell lines	3.57E-05	SMARCB1,SMARCC1,SMARCC2,TP53	4
Cell Death and Survival	survival of sarcoma cell lines	5.14E-05	HIF1A,SMARCB1,SMARCC1,SMARCC2	4
Cancer, Neurological Disease, Organismal Injury and Abnormalities	primitive neuroectodermal brain tumor	5.62E-05	SMARCA4,SMARCB1,TP53	3
Organismal Development	morphology of head	6.10E-05	ALX1,POLR3A,SOX10,TP53	4
Cellular Development, Embryonic Development, Hair and Skin Development and Function, Organ Development, Organismal Development, Tissue Development	differentiation of dermal cells	9.26E-05	HOXA7,NFE2,SIRT6,TP53	4
Cell Cycle	replicative senescence of tumor cell lines	1.32E-04	SMARCB1,TP53	2
Cellular Growth and Proliferation	colony formation of lung cell lines	1.32E-04	SPZ1,TP53	2
Tissue Development	accumulation of sarcoma cell lines	1.32E-04	SMARCB1,TP53	2
Cellular Development, Cellular Growth and Proliferation	cell proliferation of sarcoma cell lines	1.39E-04	FOSL1,SMARCA4,SMARCB1,SUZ12,TP53	5
Gene Expression	initiation of transcription of RNA	1.57E-04	GTF2B,PPARGC1A,TAF7	3
Cellular Development, Cellular Growth and Proliferation	cell proliferation of breast cancer cell lines	1.73E-04	ESRRA,FOSL1,HIC1,HIF1A,HSF1,RORA,SMARCB1,TP53	8
Cell Morphology, Cellular Development, Cellular Growth and Proliferation	morphogenesis of breast cell lines	1.84E-04	HIF1A,RORA	2
Cell Morphology, Connective Tissue Development and Function, Tissue Morphology	size of connective tissue cells	1.84E-04	PPARGC1A,TP53	2
Cellular Development, Cellular Growth and Proliferation, Connective Tissue Development and Function, Embryonic Development, Organismal Development, Skeletal and Muscular System Development and Function, Tissue Development	chondrogenesis of mesenchymal stem cells	1.84E-04	PPARGC1A,SMAD3	2
Gene Expression	binding of TATA box	1.84E-04	GTF2B,TP53	2
Cellular Movement	migration of breast cancer cell lines	2.03E-04	ESRRA,FOSL1,HIC1,HIF1A,SMAD3,TP53	6
Gene Expression	binding of DNA	2.04E-04	ESRRA,GTF2B,HIF1A,HSF1,SMARCA4,SREBF2,TP53	7
Cellular Development, Cellular Growth and Proliferation	arrest in proliferation of tumor cell lines	2.13E-04	SMARCA4,SMARCB1,TAF7,TP53	4
Cell Morphology	morphology of cells	2.34E-04	FOSL1,NFE2,PPARGC1A,RORA,SMARCA4,SMARCB1,SREBF2,TP53	8
Cancer, Gastrointestinal Disease, Hepatic System Disease, Organismal Injury and Abnormalities	gall bladder adenocarcinoma	2.40E-04	BPTF,SMARCA4,SMARCB1,TP53	4
Cancer, Neurological Disease, Organismal Injury and Abnormalities	medulloblastoma WNT-subtype	2.45E-04	SMARCA4,TP53	2
Cell Cycle	senescence of sarcoma cell lines	2.45E-04	SMARCB1,TP53	2
Cell Cycle	cell cycle progression	2.75E-04	E2F4,FOSL1,HIF1A,NKX3-1,SMAD3,SMARCA4,SMARCB1,TFCP2,THAP1,TP53	10
Cellular Development, Cellular Growth and Proliferation	cell proliferation of bone cancer cell lines	2.99E-04	FOSL1,SMARCA4,SUZ12,TP53	4
Cell Cycle	re-entry into cell cycle progression	3.14E-04	E2F4,TP53	2
Cell Cycle, Connective Tissue Development and Function	arrest in cell cycle progression of fibroblast cell lines	3.14E-04	SMARCB1,TP53	2
Developmental Disorder, Endocrine System Disorders, Hereditary Disorder, Organismal Injury and Abnormalities, Reproductive System Disease	46 XY sex reversal	3.14E-04	NR5A1,SRY	2
Cell Cycle	G1 phase of breast cancer cell lines	3.32E-04	ESRRA,SMARCB1,TP53	3
Cellular Growth and Proliferation	cytostasis of breast cancer cell lines	3.55E-04	SMAD3,SMARCA4,TP53	3
Cellular Movement	migration of tumor cell lines	3.90E-04	CTBP2,ESRRA,FOSL1,HIC1,HIF1A,SIRT6,SMAD3,SMARCB1,SUZ12,TP53	10
Cell Morphology	size of bone cancer cell lines	3.92E-04	PPARGC1A,SREBF2	2
Cell Morphology	size of sarcoma cell lines	3.92E-04	PPARGC1A,SREBF2	2
Cell Cycle, DNA Replication Recombination and Repair	DNA recombination	4.06E-04	SIRT6,SMARCB1,TP53,ZNF219	4
Cellular Development, Cellular Growth and Proliferation, Respiratory System Development and Function	proliferation of lung cell lines	4.54E-04	FOSL1,SMARCB1,TP53	3
Cell Death and Survival	cell viability of lung cancer cell lines	4.77E-04	HIF1A,NKX2-2,NRF1,TP53	4
Cell Death and Survival	cell viability of mesothelioma cell lines	4.78E-04	FOSL1,TP53	2
Organismal Development	development of multicellular organism	5.07E-04	ALX1,NFE2,NKX3-1,TP53	4
Cellular Movement	cell movement of ovarian cancer cell lines	5.10E-04	CTBP2,SMAD3,TP53	3
Cellular Development, Cellular Growth and Proliferation, Nervous System Development and Function	proliferation of astrocytes	5.73E-04	HIF1A,TP53	2
Cell Death and Survival	cell death	5.88E-04	BACH2,CTBP2,HIC1,HIF1A,HOXA7,HSF1,NFIL3,NKX3-1,NRF1,PBX3,PPARGC1A,SIRT6,SMAD3,SMARCB1,SOX10,SREBF2,TFCP2,THAP1,TP53	19
Cellular Development, Connective Tissue Development and Function, Tissue Development	differentiation of adipocytes	6.34E-04	PPARGC1A,SMAD3,SMARCB1	3
Cellular Development, Tissue Development	differentiation of connective tissue cells	6.50E-04	NFE2,PPARGC1A,SMAD3,SMARCA4,SMARCB1	5
Cell Cycle	senescence of epithelial cell lines	6.76E-04	SIRT6,TP53	2
Cellular Development, Cellular Growth and Proliferation	arrest in growth of sarcoma cell lines	6.76E-04	SMARCB1,TP53	2
Cell Death and Survival	apoptosis	7.13E-04	BACH2,CTBP2,HIC1,HIF1A,HOXA7,HSF1,NRF1,PBX3,PPARGC1A,SIRT6,SMAD3,SMARCB1,SREBF2,TFCP2,THAP1,TP53	16
Cellular Development, Cellular Growth and Proliferation	proliferation of prostate cancer cell lines	7.46E-04	ELK4,HIC1,HIF1A,NKX3-1,TAF7,TP53	6
Cellular Development, Cellular Growth and Proliferation	cell proliferation of lymphoma cell lines	7.61E-04	ETV7,HIF1A,HOXA7,TP53	4
Carbohydrate Metabolism	glycolysis of cells	7.77E-04	ESRRA,HIF1A,TP53	3
Gene Expression	expression of rRNA	7.87E-04	BRF1,TP53	2
Gene Expression	transcription of mRNA	7.87E-04	BACH2,HSF1	2
Cellular Development, Cellular Growth and Proliferation, Connective Tissue Development and Function	proliferation of fibroblast cell lines	9.38E-04	SMARCB1,SUZ12,TP53	3
Cellular Development, Embryonic Development, Organismal Development	differentiation of embryonic cells	9.38E-04	SMAD3,SMARCB1,TP53	3
Cell Cycle	arrest in cell cycle progression of sarcoma cell lines	1.03E-03	SMARCB1,TP53	2
Cell Cycle	interphase of blood cells	1.03E-03	E2F4,TP53	2
Cell Cycle	interphase of fibroblast cell lines	1.03E-03	SMARCB1,TP53	2
Cell Death and Survival	cell viability of bladder cancer cell lines	1.03E-03	HIF1A,TP53	2
Cellular Growth and Proliferation, Organismal Development	growth of Saccharomyces cerevisiae	1.03E-03	HSF1,TP53	2
Cellular Development, Embryonic Development, Hair and Skin Development and Function, Organ Development, Organismal Development, Tissue Development	differentiation of keratinocytes	1.12E-03	HOXA7,SIRT6,TP53	3
Cellular Development	differentiation of tumor cell lines	1.16E-03	E2F4,ETV7,HIF1A,SIRT6,SMARCB1	5
Cancer, Cell Cycle, Organismal Injury and Abnormalities	cell cycle progression of cancer cells	1.17E-03	TFCP2,TP53	2
Cell Cycle	arrest in cell cycle progression of lung cancer cell lines	1.17E-03	SMARCA4,TP53	2
Cell Death and Survival	cell survival of carcinoma cell lines	1.17E-03	HIF1A,NKX2-2	2
Cell Cycle	arrest in cell cycle progression of tumor cell lines	1.18E-03	HIF1A,SMARCA4,SMARCB1,TP53	4
Cell Death and Survival	cell viability of carcinoma cell lines	1.20E-03	HIF1A,NKX2-2,NRF1,TP53	4
Cell Cycle	arrest in cell cycle progression	1.24E-03	HIF1A,SMAD3,SMARCA4,SMARCB1,TP53	5
Cellular Movement	invasion of breast cancer cell lines	1.28E-03	CTBP2,FOSL1,HIC1,HIF1A,SMAD3	5
Cell Morphology	morphology of sarcoma cell lines	1.31E-03	SMARCB1,TP53	2
Cellular Movement, Connective Tissue Development and Function	migration of fibroblast cell lines	1.31E-03	SMARCB1,TP53	2
Gene Expression	binding of estrogen response element	1.31E-03	ESRRA,TP53	2
Cell Death and Survival	necrosis of brain cancer cell lines	1.35E-03	HIF1A,HOXA7,NFIL3,TP53	4
Cell Cycle	cell cycle progression of tumor cell lines	1.53E-03	HIF1A,SMAD3,SMARCA4,SMARCB1,TP53	5
Infectious Diseases	replication of virus	1.54E-03	CTBP2,HOXA7,HSF1,LHX3,NRF1,PPARGC1A,TP53	7
Cell Cycle	arrest in cell cycle progression of carcinoma cell lines	1.62E-03	SMARCA4,TP53	2
Cell Death and Survival	cell death of tumor cell lines	1.62E-03	BACH2,CTBP2,HIC1,HIF1A,HOXA7,HSF1,NFIL3,PBX3,PPARGC1A,SIRT6,SMAD3,SOX10,THAP1,TP53	14
Cellular Response to Therapeutics	sensitivity of tumor cell lines	1.62E-03	HIF1A,TP53	2
DNA Replication Recombination and Repair	DNA replication	1.69E-03	ESRRA,SMARCB1,TP53,WRNIP1	4
Cell Death and Survival	apoptosis of tumor cell lines	1.70E-03	BACH2,CTBP2,HIC1,HIF1A,HOXA7,HSF1,PBX3,PPARGC1A,SIRT6,SMAD3,THAP1,TP53	12
Cancer, Endocrine System Disorders, Organismal Injury and Abnormalities	adrenal cortex adenoma	1.79E-03	NR5A1,TP53	2
Cellular Development, Cellular Growth and Proliferation	arrest in proliferation of carcinoma cell lines	1.79E-03	SMARCA4,TP53	2
Cell Cycle	senescence of tumor cell lines	1.92E-03	HIF1A,SMARCB1,TP53	3
Cell Cycle, DNA Replication Recombination and Repair	homologous recombination of DNA	1.97E-03	SIRT6,TP53	2
Cell Cycle	ploidy	2.06E-03	HIF1A,SMARCB1,TP53	3
