# Supplementary material for: Differential Impact of CD43 and CD28 on T-Cell Differentiation Depending on the Order of Engagement with the TCR
Source: Int J Mol Sci. 2024 Mar 8;25(6):3135. doi: 10.3390/ijms25063135 (PMC10970108; doi:10.3390/ijms25063135)
Supplement: Supplementary file 1 [file ijms-25-03135-s001.zip › Supplementary data Table S4.xlsx]

## Sheet: Neighbour-Promoter_regions
PROMOTER	Transcript: CSF2-001 ENST00000296871
	Description
	colony stimulating factor 2 (granulocyte-macrophage) [Source:HGNC Symbol;Acc:2434]
	Location
	Chromosome 5: 131,409,483-131,411,859 forward strand.
	Gene
	This transcript is a product of gene ENSG00000164400
1rst exon	131409483	131409675
Upstream neighbour	Transcript: IL3-001 ENST00000296870
	Description
	interleukin 3 (colony-stimulating factor, multiple) [Source:HGNC Symbol;Acc:6011]
	Location
	Chromosome 5: 131,396,222-131,398,897 forward strand.
REGION	chr5:131,398,897-131,409,675
PROMOTER	Transcript: IFNG-001 ENST00000229135
	Description
	interferon, gamma [Source:HGNC Symbol;Acc:5438]
	Location
	Chromosome 12: 68,548,548-68,553,527 reverse strand.
	Gene
	This transcript is a product of gene ENSG00000111537
1rst exon	68553527	68553282
Upstream neighbour	Transcript: IL26-001 ENST00000229134
	Description
	interleukin 26 [Source:HGNC Symbol;Acc:17119]
	Location
	Chromosome 12: 68,595,131-68,619,601 reverse strand.
	Gene
	This transcript is a product of gene ENSG00000111536
REGION	chr12:68,553,282-68,595,131
PROMOTER	Transcript: CCL17-001 ENST00000219244
	Description
	chemokine (C-C motif) ligand 17 [Source:HGNC Symbol;Acc:10615]
	Location
	Chromosome 16: 57,438,679-57,449,974 forward strand.
	Gene
	This transcript is a product of gene ENSG00000102970
1rst exon	57438679	57438748
Upstream neighbour	Transcript: CX3CL1-001 ENST00000006053
	Description
	chemokine (C-X3-C motif) ligand 1 [Source:HGNC Symbol;Acc:10647]
	Location
	Chromosome 16: 57,406,370-57,418,960 forward strand.
	Gene
	This transcript is a product of gene ENSG00000006210
REGION	chr16:57,418,960-57,438,748
PROMOTER	Transcript: CXCL2-001 ENST00000508487
	Description
	chemokine (C-X-C motif) ligand 2 [Source:HGNC Symbol;Acc:4603]
	Location
	Chromosome 4: 74,962,752-74,965,010 reverse strand.
	Gene
	This transcript is a product of gene ENSG00000081041
1rst exon	74965010	74964738
Upstream neighbour	Transcript: MTHFD2L-001 ENST00000325278
	Description
	methylenetetrahydrofolate dehydrogenase (NADP+ dependent) 2-like [Source:HGNC Symbol;Acc:31865]
	Location
	Chromosome 4: 75,023,890-75,168,816 forward strand.
	Gene
	This transcript is a product of gene ENSG00000163738
REGION	chr4:74,964,738-75,023,890
PROMOTER	Transcript: CXCL1-001 ENST00000395761
	Description
	chemokine (C-X-C motif) ligand 1 (melanoma growth stimulating activity, alpha) [Source:HGNC Symbol;Acc:4602]
	Location
	Chromosome 4: 74,735,121-74,736,959 forward strand.
	Gene
	This transcript is a product of gene ENSG00000163739
1rst exon	74735121	74735287
Upstream neighbour	Transcript: PF4V1-001 ENST00000226524
	Description
	platelet factor 4 variant 1 [Source:HGNC Symbol;Acc:8862]
	Location
	Chromosome 4: 74,718,906-74,719,872 forward strand.
	Gene
	This transcript is a product of gene ENSG00000109272
REGION	chr4:74,719,872-74,735,287
PROMOTER	Transcript: OSM-001 ENST00000215781
	Description
	oncostatin M [Source:HGNC Symbol;Acc:8506]
	Location
	Chromosome 22: 30,658,818-30,662,829 reverse strand.
	Gene
	This transcript is a product of gene ENSG00000099985
1rst exon	30662829	30662755
Upstream neighbour	Transcript: RP1-130H16.18-005 ENST00000330168
	Description
	Uncharacterized protein Source: UniProtKB/TrEMBL H0Y2U5
	Location
	Chromosome 22: 30,681,227-30,691,832 reverse strand.
	Gene
	This transcript is a product of gene ENSG00000248751
REGION	chr22:30,662,755-30,681,227
PROMOTER	Transcript: IL12B-001 ENST00000231228
	Description
	interleukin 12B (natural killer cell stimulatory factor 2, cytotoxic lymphocyte maturation factor 2, p40) [Source:HGNC Symbol;Acc:5970]
	Location
	Chromosome 5: 158,741,791-158,757,895 reverse strand.
	Gene
	This transcript is a product of gene ENSG00000113302
1rst exon	158757895	158757440
Upstream neighbour	Transcript: ADRA1B-001 ENST00000306675
	Description
	adrenoceptor alpha 1B [Source:HGNC Symbol;Acc:278]
	Location
	Chromosome 5: 159,343,790-159,399,551 forward strand.
	Gene
	This transcript is a product of gene ENSG00000170214
REGION	chr5:158,757,440-159,343,790
PROMOTER	Transcript: CCL5-001 ENST00000293272
	Description
	chemokine (C-C motif) ligand 5 [Source:HGNC Symbol;Acc:10632]
	Location
	Chromosome 17: 34,198,495-34,207,512 reverse strand.
	Gene
	This transcript is a product of gene ENSG00000161570
1rst exon	34207512	34207234
Upstream neighbour	Transcript: RDM1-001 ENST00000293273
	Description
	RAD52 motif 1 [Source:HGNC Symbol;Acc:19950]
	Location
	Chromosome 17: 34,245,070-34,257,777 reverse strand.
	Gene
	This transcript is a product of gene ENSG00000187456
REGION	chr17:34,207,234-34,245,070
PROMOTER	Transcript: CXCL9-001 ENST00000264888
	Description
	chemokine (C-X-C motif) ligand 9 [Source:HGNC Symbol;Acc:7098]
	Location
	Chromosome 4: 76,922,428-76,928,641 reverse strand.
	Gene
	This transcript is a product of gene ENSG00000138755
1rst exon	76928641	76928539
Upstream neighbour	Transcript: ART3-004 ENST00000341029
	Description
	ADP-ribosyltransferase 3 [Source:HGNC Symbol;Acc:725]
	Location
	Chromosome 4: 76,932,353-77,033,955 forward strand.
	Gene
	This transcript is a product of gene ENSG00000156219
REGION	chr4:76,928,539-76,932,353
PROMOTER	Transcript: IL1B-001 ENST00000263341
	Description
	interleukin 1, beta [Source:HGNC Symbol;Acc:5992]
	Location
	Chromosome 2: 113,587,328-113,594,480 reverse strand.
	Gene
	This transcript is a product of gene ENSG00000125538
1rst exon	113594480	113594285
Upstream neighbour	Transcript: IL37-001 ENST00000263326
	Description
	interleukin 37 [Source:HGNC Symbol;Acc:15563]
	Location
	Chromosome 2: 113,670,548-113,676,459 forward strand.
	Gene
	This transcript is a product of gene ENSG00000125571
REGION	chr2:113,594,285-113,670,548
PROMOTER	Transcript: CXCL5-001 ENST00000296027
	Description
	chemokine (C-X-C motif) ligand 5 [Source:HGNC Symbol;Acc:10642]
	Location
	Chromosome 4: 74,861,359-74,864,496 reverse strand.
	Gene
	This transcript is a product of gene ENSG00000163735
1rst exon	74864496	74864190
Upstream neighbour	Transcript: CXCL3-001 ENST00000296026
	Description
	chemokine (C-X-C motif) ligand 3 [Source:HGNC Symbol;Acc:4604]
	Location
	Chromosome 4: 74,902,306-74,904,406 reverse strand.
	Gene
	This transcript is a product of gene ENSG00000163734
REGION	chr4:74,864,190- 74,902,306
PROMOTER	Transcript: PDGFB-001 ENST00000331163
	Description
	platelet-derived growth factor beta polypeptide [Source:HGNC Symbol;Acc:8800]
	Location
	Chromosome 22: 39,619,364-39,640,756 reverse strand.
	Gene
	This transcript is a product of gene ENSG00000100311
1rst exon	39640756	39639906
Upstream neighbour	Transcript: RPL3-001 ENST00000216146
	Description
	ribosomal protein L3 [Source:HGNC Symbol;Acc:10332]
	Location
	Chromosome 22: 39,708,889-39,715,776 reverse strand.
	Gene
	This transcript is a product of gene ENSG00000100316
REGION	chr22:39,639,906-39,708,889
PROMOTER	Transcript: VEGFA-001 ENST00000372067
	Description
	vascular endothelial growth factor A [Source:HGNC Symbol;Acc:12680]
	Location
	Chromosome 6: 43,737,950-43,754,224 forward strand.
	Gene
	This transcript is a product of gene ENSG00000112715
1rst exon	43737950	43739049
Upstream neighbour	Transcript: MRPS18A-003 ENST00000372133
	Description
	mitochondrial ribosomal protein S18A [Source:HGNC Symbol;Acc:14515]
	Location
	Chromosome 6: 43,639,040-43,655,528 reverse strand.
	Gene
	This transcript is a product of gene ENSG00000096080
REGION	chr6:43,739,049-43,655,528
PROMOTER	Transcript: CXCL12-002 ENST00000374429
	Description
	chemokine (C-X-C motif) ligand 12 [Source:HGNC Symbol;Acc:10672]
	Location
	Chromosome 10: 44,865,613-44,880,540 reverse strand.
	Gene
	This transcript is a product of gene ENSG00000107562
1rst exon	44880540	44880393
Upstream neighbour	Transcript: TMEM72-001 ENST00000389583
	Description
	transmembrane protein 72 [Source:HGNC Symbol;Acc:31658]
	Location
	Chromosome 10: 45,406,648-45,432,450 forward strand.
	Gene
	This transcript is a product of gene ENSG00000187783
REGION	chr10:44,880,393-45,406,648
PROMOTER	Transcript: KITLG-001 ENST00000347404
	Description
	KIT ligand [Source:HGNC Symbol;Acc:6343]
	Location
	Chromosome 12: 88,890,359-88,974,628 reverse strand.
	Gene
	This transcript is a product of gene ENSG00000049130
1rst exon	88974628	88974041
Upstream neighbour	Transcript: DUSP6-001 ENST00000279488
	Description
	dual specificity phosphatase 6 [Source:HGNC Symbol;Acc:3072]
	Location
	Chromosome 12: 89,741,009-89,747,048 reverse strand.
	Gene
	This transcript is a product of gene ENSG00000139318
REGION	chr12:88,974,041-89,741,009
PROMOTER	Transcript: CCL8-001 ENST00000394620
	Description
	chemokine (C-C motif) ligand 8 [Source:HGNC Symbol;Acc:10635]
	Location
	Chromosome 17: 32,646,055-32,648,421 forward strand.
	Gene
	This transcript is a product of gene ENSG00000108700
1rst exon	32646055	32646596
Upstream neighbour	Transcript: CCL11-001 ENST00000305869
	Description
	chemokine (C-C motif) ligand 11 [Source:HGNC Symbol;Acc:10610]
	Location
	Chromosome 17: 32,612,687-32,615,353 forward strand.
	Gene
	This transcript is a product of gene ENSG00000172156
REGION	chr17:32,615,353-32,646,596
PROMOTER	Transcript: LEP-001 ENST00000308868
	Description
	leptin [Source:HGNC Symbol;Acc:6553]
	Location
	Chromosome 7: 127,881,337-127,897,681 forward strand.
	Gene
	This transcript is a product of gene ENSG00000174697
1rst exon	127881337	127881359
Upstream neighbour	Transcript: SND1-001 ENST00000354725
	Description
	staphylococcal nuclease and tudor domain containing 1 [Source:HGNC Symbol;Acc:30646]
	Location
	Chromosome 7: 127,292,234-127,732,659 forward strand.
	Gene
	This transcript is a product of gene ENSG00000197157
REGION	chr7:127,732,659-127,881,359
PROMOTER	Transcript: IL6-001 ENST00000404625
	Description
	interleukin 6 (interferon, beta 2) [Source:HGNC Symbol;Acc:6018]
	Location
	Chromosome 7: 22,765,503-22,771,621 forward strand.
	Gene
	This transcript is a product of gene ENSG00000136244
1rst exon	22765503	22765877
Upstream neighbour	Transcript: STEAP1B-001 ENST00000406890
	Description
	STEAP family member 1B [Source:HGNC Symbol;Acc:41907]
	Location
	Chromosome 7: 22,459,063-22,539,796 reverse strand.
	Gene
	This transcript is a product of gene ENSG00000105889
REGION	chr7:22,539,796-22,765,877
PROMOTER	Transcript: TGFB1-001 ENST00000221930
	Description
	transforming growth factor, beta 1 [Source:HGNC Symbol;Acc:11766]
	Location
	Chromosome 19: 41,836,228-41,859,816 reverse strand.
	Gene
	This transcript is a product of gene ENSG00000105329
1rst exon	41859816	41858595
Upstream neighbour	Transcript: TMEM91-001 ENST00000392002	41858595
	Description
	transmembrane protein 91 [Source:HGNC Symbol;Acc:32393]
	Location
	Chromosome 19: 41,882,129-41,889,988 forward strand.
	Gene
	This transcript is a product of gene ENSG00000142046
REGION	chr19:41,858,595-41,882,129
PROMOTER	Transcript: IL13-001 ENST00000304506
	Description
	interleukin 13 [Source:HGNC Symbol;Acc:5973]
	Location
	Chromosome 5: 131,993,865-131,996,802 forward strand.
	Gene
	This transcript is a product of gene ENSG00000169194
1rst exon	131993865	131994052
Upstream neighbour	Transcript: RAD50-201 ENST00000378823
	Description
	RAD50 homolog (S. cerevisiae) [Source:HGNC Symbol;Acc:9816]
	Location
	Chromosome 5: 131,892,616-131,980,313 forward strand.
	Gene
	This transcript is a product of gene ENSG00000113522
REGION	chr5:131,980,313-131,994,052
PROMOTER	Transcript: IL4-001 ENST00000231449
	Description
	interleukin 4 [Source:HGNC Symbol;Acc:6014]
	Location
	Chromosome 5: 132,009,678-132,018,368 forward strand.
	Gene
	This transcript is a product of gene ENSG00000113520
1rst exon	132009678	132009877
Upstream neighbour	Transcript: IL13-001 ENST00000304506
	Description
	interleukin 13 [Source:HGNC Symbol;Acc:5973]
	Location
	Chromosome 5: 131,993,865-131,996,802 forward strand.
	Gene
	This transcript is a product of gene ENSG00000169194
REGION	chr5:131,996,802-132,009,877
PROMOTER	Transcript: IL5-001 ENST00000231454
	Description
	interleukin 5 (colony-stimulating factor, eosinophil) [Source:HGNC Symbol;Acc:6016]
	Location
	Chromosome 5: 131,877,136-131,879,214 reverse strand.
	Gene
	This transcript is a product of gene ENSG00000113525
1rst exon	131879214	131879027
Upstream neighbour	Transcript: RAD50-201 ENST00000378823
	Description
	RAD50 homolog (S. cerevisiae) [Source:HGNC Symbol;Acc:9816]
	Location
	Chromosome 5: 131,892,616-131,980,313 forward strand.
	Gene
	This transcript is a product of gene ENSG00000113522
REGION	chr5:131,879,027-131,892,616
PROMOTER	Transcript: CCL22-001 ENST00000219235
	Description
	chemokine (C-C motif) ligand 22 [Source:HGNC Symbol;Acc:10621]
	Location
	Chromosome 16: 57,392,684-57,400,102 forward strand.
	Gene
	This transcript is a product of gene ENSG00000102962
1rst exon	57392684	57392801
Upstream neighbour	Transcript: PLLP-001 ENST00000219207
	Description
	plasmolipin [Source:HGNC Symbol;Acc:18553]
	Location
	Chromosome 16: 57,290,004-57,318,599 reverse strand.
	Gene
	This transcript is a product of gene ENSG00000102934
REGION	chr16:57,318,599-57,392,801
PROMOTER	Transcript: CSF1-001 ENST00000329608
	Description
	colony stimulating factor 1 (macrophage) [Source:HGNC Symbol;Acc:2432]
	Location
	Chromosome 1: 110,453,255-110,473,614 forward strand.
	Gene
	This transcript is a product of gene ENSG00000184371
1rst exon	110453255	110453684
Upstream neighbour	Transcript: EPS8L3-001 ENST00000369805
	Description
	EPS8-like 3 [Source:HGNC Symbol;Acc:21297]
	Location
	Chromosome 1: 110,292,703-110,306,649 reverse strand.
	Gene
	This transcript is a product of gene ENSG00000198758
REGION	chr1:110,306,649-110,453,684
PROMOTER	Transcript: IL8-001 ENST00000307407
	Description
	interleukin 8 [Source:HGNC Symbol;Acc:6025]
	Location
	Chromosome 4: 74,606,223-74,609,433 forward strand.
	Gene
	This transcript is a product of gene ENSG00000169429
1rst exon	74606223	74606439
Upstream neighbour	Transcript: RASSF6-001 ENST00000307439
	Description
	Ras association (RalGDS/AF-6) domain family member 6 [Source:HGNC Symbol;Acc:20796]
	Location
	Chromosome 4: 74,437,267-74,486,265 reverse strand.
	Gene
	This transcript is a product of gene ENSG00000169435
REGION	chr4:74,486,265-74,606,439
PROMOTER	Transcript: IL7-001 ENST00000263851
	Description
	interleukin 7 [Source:HGNC Symbol;Acc:6023]
	Location
	Chromosome 8: 79,645,007-79,717,758 reverse strand.
	Gene
	This transcript is a product of gene ENSG00000104432
1rst exon	79717758	79717148
Upstream neighbour	Transcript: STMN2-001 ENST00000220876
	Description
	stathmin-like 2 [Source:HGNC Symbol;Acc:10577]
	Location
	Chromosome 8: 80,523,049-80,578,410 forward strand.
	Gene
	This transcript is a product of gene ENSG00000104435
REGION	chr8:79,717,148- 80,523,049
PROMOTER	Transcript: EGF-001 ENST00000265171
	Description
	epidermal growth factor [Source:HGNC Symbol;Acc:3229]
	Location
	Chromosome 4: 110,834,047-110,933,422 forward strand.
	Gene
	This transcript is a product of gene ENSG00000138798
1rst exon	110834047	110834618
Upstream neighbour	Transcript: LRIT3-002 ENST00000594814
	Description
	leucine-rich repeat, immunoglobulin-like and transmembrane domains 3 [Source:HGNC Symbol;Acc:24783]
	Location
	Chromosome 4: 110,769,358-110,793,471 forward strand.
	Gene
	This transcript is a product of gene ENSG00000183423
REGION	chr4:110,793,471-110,834,618
PROMOTER	Transcript: IGF1-001 ENST00000337514
	Description
	insulin-like growth factor 1 (somatomedin C) [Source:HGNC Symbol;Acc:5464]
	Location
	Chromosome 12: 102,789,652-102,874,423 reverse strand.
	Gene
	This transcript is a product of gene ENSG00000017427
1rst exon	102874423	102874097
Upstream neighbour	Transcript: PAH-001 ENST00000553106
	Description
	phenylalanine hydroxylase [Source:HGNC Symbol;Acc:8582]
	Location
	Chromosome 12: 103,230,663-103,311,381 reverse strand.
	Gene
	This transcript is a product of gene ENSG00000171759
REGION	chr12:102,874,097-103,230,663
PROMOTER	Transcript: IL2-001 ENST00000226730
	Description
	interleukin 2 [Source:HGNC Symbol;Acc:6001]
	Location
	Chromosome 4: 123,372,625-123,377,880 reverse strand.
	Gene
	This transcript is a product of gene ENSG00000109471
1rst exon	123377880	123377449
Upstream neighbour	Transcript: IL21-001 ENST00000264497
	Description
	interleukin 21 [Source:HGNC Symbol;Acc:6005]
	Location
	Chromosome 4: 123,533,783-123,542,224 reverse strand.
	Gene
	This transcript is a product of gene ENSG00000138684
REGION	chr4:123,377,449-123,533,783
PROMOTER	Transcript: IL3-001 ENST00000296870
	Description
	interleukin 3 (colony-stimulating factor, multiple) [Source:HGNC Symbol;Acc:6011]
	Location
	Chromosome 5: 131,396,222-131,398,897 forward strand.
	Gene
	This transcript is a product of gene ENSG00000164399
1rst exon	131396222	131396561
Upstream neighbour	Transcript: ACSL6-001 ENST00000379264
	Description
	acyl-CoA synthetase long-chain family member 6 [Source:HGNC Symbol;Acc:16496]
	Location
	Chromosome 5: 131,285,666-131,347,355 reverse strand.
	Gene
	This transcript is a product of gene ENSG00000164398
REGION	chr5:131,347,355-131,396,561
PROMOTER	Transcript: CCL2-001 ENST00000225831
	Description
	chemokine (C-C motif) ligand 2 [Source:HGNC Symbol;Acc:10618]
	Location
	Chromosome 17: 32,582,304-32,584,222 forward strand.
	Gene
	This transcript is a product of gene ENSG00000108691
1rst exon	32582304	32582444
Upstream neighbour	Transcript: ASIC2-003 ENST00000359872
	Description
	acid-sensing (proton-gated) ion channel 2 [Source:HGNC Symbol;Acc:99]
	Location
	Chromosome 17: 31,340,105-32,484,313 reverse strand.
	Gene
	This transcript is a product of gene ENSG00000108684
REGION	chr17:32,484,313-32,582,444
PROMOTER	Transcript: CSF3-001 ENST00000225474
	Description
	colony stimulating factor 3 (granulocyte) [Source:HGNC Symbol;Acc:2438]
	Location
	Chromosome 17: 38,171,697-38,174,066 forward strand.
	Gene
	This transcript is a product of gene ENSG00000108342
1rst exon	38171697	38171767
Upstream neighbour	Transcript: PSMD3-001 ENST00000264639
	Description
	proteasome (prosome, macropain) 26S subunit, non-ATPase, 3 [Source:HGNC Symbol;Acc:9560]
	Location
	Chromosome 17: 38,137,050-38,154,213 forward strand.
	Gene
	This transcript is a product of gene ENSG00000108344
REGION	chr17:38,154,213-38,171,767
PROMOTER	Transcript: CCL1-001 ENST00000225842
	Description
	chemokine (C-C motif) ligand 1 [Source:HGNC Symbol;Acc:10609]
	Location
	Chromosome 17: 32,687,347-32,690,250 reverse strand.
	Gene
	This transcript is a product of gene ENSG00000108702
1rst exon	32690250	32690105
Upstream neighbour	Transcript: C17orf102-001 ENST00000357754
	Description
	chromosome 17 open reading frame 102 [Source:HGNC Symbol;Acc:34412]
	Location
	Chromosome 17: 32,901,142-32,906,388 reverse strand.
	Gene
	This transcript is a product of gene ENSG00000197322
REGION	chr17:32,690,105-32,901,142
PROMOTER	Transcript: IL12A-001 ENST00000305579
	Description
	interleukin 12A (natural killer cell stimulatory factor 1, cytotoxic lymphocyte maturation factor 1, p35) [Source:HGNC Symbol;Acc:5969]
	Location
	Chromosome 3: 159,706,537-159,713,799 forward strand.
	Gene
	This transcript is a product of gene ENSG00000168811
1rst exon	159706537	159706961
Upstream neighbour	Transcript: IQCJ-SCHIP1-001 ENST00000485419
	Description
	IQCJ-SCHIP1 readthrough [Source:HGNC Symbol;Acc:38842]
	Location
	Chromosome 3: 158,787,053-159,615,147 forward strand.
	Gene
	This transcript is a product of gene ENSG00000250588
REGION	chr3:159,615,147-159,706,961
PROMOTER	Transcript: CCL7-001 ENST00000378569
	Description
	chemokine (C-C motif) ligand 7 [Source:HGNC Symbol;Acc:10634]
	Location
	Chromosome 17: 32,597,240-32,599,261 forward strand.
	Gene
	This transcript is a product of gene ENSG00000108688
1rst exon	32597240	32597385
Upstream neighbour	Transcript: CCL2-001 ENST00000225831
	Description
	chemokine (C-C motif) ligand 2 [Source:HGNC Symbol;Acc:10618]
	Location
	Chromosome 17: 32,582,304-32,584,222 forward strand.
	Gene
	This transcript is a product of gene ENSG00000108691
REGION	chr17:32,584,222-32,597,385
PROMOTER	Transcript: IL15-001 ENST00000296545
	Description
	interleukin 15 [Source:HGNC Symbol;Acc:5977]
	Location
	Chromosome 4: 142,557,755-142,655,140 forward strand.
	Gene
	This transcript is a product of gene ENSG00000164136
1rst exon	142557755	142558377
Upstream neighbour	Transcript: ZNF330-001 ENST00000262990
	Description
	zinc finger protein 330 [Source:HGNC Symbol;Acc:15462]
	Location
	Chromosome 4: 142,142,041-142,155,851 forward strand.
	Gene
	This transcript is a product of gene ENSG00000109445
REGION	chr4:142,155,851-142558377
PROMOTER	Transcript: IL1A-001 ENST00000263339
	Description
	interleukin 1, alpha [Source:HGNC Symbol;Acc:5991]
	Location
	Chromosome 2: 113,531,492-113,542,167 reverse strand.
	Gene
	This transcript is a product of gene ENSG00000115008
1rst exon	113542167	113542020
Upstream neighbour	Transcript: IL1B-001 ENST00000263341
	Description
	interleukin 1, beta [Source:HGNC Symbol;Acc:5992]
	Location
	Chromosome 2: 113,587,328-113,594,480 reverse strand.
	Gene
	This transcript is a product of gene ENSG00000125538
REGION	chr2:113,542,020-113,587,328
PROMOTER	Transcript: IL10-001 ENST00000423557
	Description
	interleukin 10 [Source:HGNC Symbol;Acc:5962]
	Location
	Chromosome 1: 206,940,947-206,945,839 reverse strand.
	Gene
	This transcript is a product of gene ENSG00000136634
1rst exon	206945839	206945616
Upstream neighbour	Transcript: IL19-001 ENST00000340758
	Description
	interleukin 19 [Source:HGNC Symbol;Acc:5990]
	Location
	Chromosome 1: 206,972,215-207,016,324 forward strand.
	Gene
	This transcript is a product of gene ENSG00000142224
REGION	chr1:206,945,616- 206,972,215
PROMOTER	Transcript: THPO-001 ENST00000204615
	Description
	thrombopoietin [Source:HGNC Symbol;Acc:11795]
	Location
	Chromosome 3: 184,089,723-184,095,932 reverse strand.
	Gene
	This transcript is a product of gene ENSG00000090534
1rst exon	184095932	184095863
Upstream neighbour	Transcript: CHRD-001 ENST00000204604
	Description
	chordin [Source:HGNC Symbol;Acc:1949]
	Location
	Chromosome 3: 184,097,861-184,107,617 forward strand.
	Gene
	This transcript is a product of gene ENSG00000090539
REGION	chr3:184,095,863-184,097,861
PROMOTER	Transcript: CCL15-001 ENST00000354059
	Description
	chemokine (C-C motif) ligand 15 [Source:HGNC Symbol;Acc:10613]
	Location
	Chromosome 17: 34,324,618-34,329,084 reverse strand.
	Gene
	This transcript is a product of gene ENSG00000267596
1rst exon	34329084	34328456
Upstream neighbour	Transcript: CCL23-001 ENST00000293280
	Description
	chemokine (C-C motif) ligand 23 [Source:HGNC Symbol;Acc:10622]
	Location
	Chromosome 17: 34,340,098-34,345,005 reverse strand.
	Gene
	This transcript is a product of gene ENSG00000167236
REGION	chr17:34,328,456-34,340,098
PROMOTER	Transcript: LTA-002 ENST00000454783
	Description
	lymphotoxin alpha [Source:HGNC Symbol;Acc:6709]
	Location
	Chromosome 6: 31,539,831-31,542,101 forward strand.
	Gene
	This transcript is a product of gene ENSG00000226979
1rst exon	31539831	31540079
Upstream neighbour	Transcript: NFKBIL1-001 ENST00000376148
	Description
	nuclear factor of kappa light polypeptide gene enhancer in B-cells inhibitor-like 1 [Source:HGNC Symbol;Acc:7800]
	Location
	Chromosome 6: 31,515,358-31,526,606 forward strand.
	Gene
	This transcript is a product of gene ENSG00000204498
REGION	chr6:31,526,606-31,540,079
PROMOTER	Transcript: TNF-001 ENST00000449264
	Description
	tumor necrosis factor [Source:HGNC Symbol;Acc:11892]
	Location
	Chromosome 6: 31,543,344-31,546,113 forward strand.
	Gene
	This transcript is a product of gene ENSG00000232810
1rst exon	31543344	31543704
Upstream neighbour	Transcript: LTA-002 ENST00000454783
	Description
	lymphotoxin alpha [Source:HGNC Symbol;Acc:6709]
	Location
	Chromosome 6: 31,539,831-31,542,101 forward strand.
	Gene
	This transcript is a product of gene ENSG00000226979
REGION	chr6:31,542,101-31,543,704
PROMOTER	Transcript: ANG-001 ENST00000336811
	Description
	angiogenin, ribonuclease, RNase A family, 5 [Source:HGNC Symbol;Acc:483]
	Location
	Chromosome 14: 21,152,336-21,162,345 forward strand.
	Gene
	This transcript is a product of gene ENSG00000214274
1rst exon	21152336	21152917
Upstream neighbour	Transcript: OR6S1-001 ENST00000320704
	Description
	olfactory receptor, family 6, subfamily S, member 1 [Source:HGNC Symbol;Acc:15363]
	Location
	Chromosome 14: 21,108,855-21,109,850 reverse strand.
	Gene
	This transcript is a product of gene ENSG00000181803
REGION	chr14:21,109,850-21,152,917

## Sheet: MATCH
		core	core	matrix	matrix	Matrix(average) + 1 SD	Total Sites (filtered AV +1sd)	Total TFs (filtered AV +1sd)
	Promoters_minSUM	Averages_cs_minSUM	SDs_cs_minSUM	Averages_ms_minSUM	SDs_ms_minSUM	Cutoff_values_ms_minSUM
Anqioqenin	Homo_sapiens-ENSG00000214274-ANG	0.915	0.10225	0.857986	0.101945	0.96	36	21
EGF	Homo_sapiens-ENSG00000138798-EGF	0.903	0.109995	0.858432	0.101921	0.96	59	32
ENA-78	Homo_sapiens-ENSG00000163735-CXCL5	0.904	0.115328	0.850184	0.108394	0.959	56	30
GCSF	Homo_sapiens-ENSG00000108342-CSF3	0.908	0.120041	0.853625	0.114929	0.969	59	34
GM-CSF	Homo_sapiens-ENSG00000164400-CSF2	0.906	0.114262	0.85177	0.104525	0.956	58	27
GRO	Homo_sapiens-ENSG00000081041-CXCL2	0.914	0.111934	0.857906	0.104477	0.962	57	34
GRO-a	Homo_sapiens-ENSG00000163739-CXCL1	0.912	0.113437	0.855404	0.106247	0.962	47	27
I-309	Homo_sapiens-ENSG00000108702-CCL1	0.911	0.113514	0.860436	0.106727	0.967	50	27
IFN-g	Homo_sapiens-ENSG00000111537-IFNG	0.901	0.117295	0.848094	0.108716	0.957	51	33
IGF-1	Homo_sapiens-ENSG00000017427-IGF1	0.893	0.119895	0.840085	0.112598	0.953	52	30
IL-10	Homo_sapiens-ENSG00000136634-IL10	0.894	0.120976	0.84238	0.11173	0.954	55	33
IL-12	Homo_sapiens-ENSG00000168811-IL12A	0.904	0.113251	0.850864	0.101514	0.952	56	30
IL-12-1	Homo_sapiens-ENSG00000113302-IL12B	0.913	0.108575	0.858057	0.0984911	0.957	50	23
IL-13	Homo_sapiens-ENSG00000169194-IL13	0.905	0.112745	0.850252	0.107387	0.958	53	31
IL-15	Homo_sapiens-ENSG00000164136-IL15	0.915	0.107998	0.864902	0.10243	0.967	72	36
IL-1a	Homo_sapiens-ENSG00000115008-IL1A	0.905	0.118006	0.853346	0.10476	0.958	59	26
IL-1b	Homo_sapiens-ENSG00000125538-IL1B	0.903	0.116672	0.853835	0.105458	0.959	55	31
IL-2	Homo_sapiens-ENSG00000109471-IL2	0.908	0.110562	0.857894	0.0965575	0.954	61	32
IL-3	Homo_sapiens-ENSG00000164399-IL3	0.908	0.11068	0.854561	0.111024	0.966	50	31
IL-4	Homo_sapiens-ENSG00000113520-IL4	0.9	0.116933	0.849329	0.111591	0.961	64	36
IL-5	Homo_sapiens-ENSG00000113525-IL5	0.916	0.105026	0.861958	0.10147	0.963	60	30
IL-6	Homo_sapiens-ENSG00000136244-IL6	0.906	0.111665	0.852273	0.110211	0.962	41	22
IL-7	Homo_sapiens-ENSG00000104432-IL7	0.897	0.123432	0.847457	0.114163	0.962	53	28
IL-8	Homo_sapiens-ENSG00000169429-IL8	0.919	0.10473	0.869254	0.0993216	0.969	71	31
Leptin	Homo_sapiens-ENSG00000174697-LEP	0.904	0.11054	0.844459	0.10803	0.952	42	24
MCP-1	Homo_sapiens-ENSG00000108691-CCL2	0.903	0.113781	0.842838	0.110859	0.954	44	28
MCP-2	Homo_sapiens-ENSG00000108700-CCL8	0.912	0.105323	0.863172	0.0983943	0.962	50	27
MCP-3	Homo_sapiens-ENSG00000108688-CCL7	0.901	0.117255	0.851687	0.107752	0.959	42	24
MCSF	Homo_sapiens-ENSG00000184371-CSF1	0.916	0.102533	0.861751	0.101442	0.963	51	29
MDC	Homo_sapiens-ENSG00000102962-CCL22	0.904	0.117082	0.850928	0.109432	0.96	52	29
MIG	Homo_sapiens-ENSG00000138755-CXCL9	0.904	0.118168	0.856493	0.100796	0.957	62	30
MIP-1d	Homo_sapiens-ENSG00000267596-CCL15	0.899	0.120417	0.848869	0.111937	0.961	63	33
Oncostatin_M	Homo_sapiens-ENSG00000099985-OSM	0.905	0.111463	0.85247	0.104113	0.957	64	31
PDGF_BB	Homo_sapiens-ENSG00000100311-PDGFB	0.909	0.109126	0.85344	0.103544	0.957	58	26
RANTES	Homo_sapiens-ENSG00000161570-CCL5	0.896	0.117703	0.847791	0.104984	0.953	55	29
SCF	Homo_sapiens-ENSG00000049130-KITLG	0.915	0.109272	0.855717	0.0962574	0.952	65	38
SDF-1	Homo_sapiens-ENSG00000107562-CXCL12	0.912	0.106212	0.857456	0.100185	0.958	53	23
TARC	Homo_sapiens-ENSG00000102970-CCL17	0.915	0.106168	0.863012	0.103373	0.966	54	26
TGF-B1	Homo_sapiens-ENSG00000105329-TGFB1	0.917	0.108345	0.866584	0.102077	0.969	68	28
Thrombopoietin	Homo_sapiens-ENSG00000090534-THPO	0.912	0.110263	0.858406	0.103264	0.962	51	28
TNF-a	Homo_sapiens-ENSG00000232810-TNF	0.906	0.118524	0.853693	0.114242	0.968	39	19
TNF-b	Homo_sapiens-ENSG00000226979-LTA	0.905	0.113065	0.858724	0.102036	0.961	55	26
VEGF	Homo_sapiens-ENSG00000112715-VEGFA	0.91	0.10915	0.851098	0.104979	0.956	52	22

## Sheet: Intergenic regions&Total TFs
			Intergenic regions ( Assemblies)
			Human Feb. 2009 (GRCh37/hg19)	Human Dec. 2013 (GRCh38/hg38)		Predicted TFs
Common_Nomenclature	HGNC	Transcript	for TFs	for cCREs	Length (bp)	ENCODE only	ENCODE+Match
TNF-a	TNF	001_ENST00000449264	chr6:31,542,101-31,543,704	chr6:31574324-31575927	1603	44	53
Thrombopoietin	THPO	001_ENST00000204615	chr3:184,095,863-184,097,861	chr3:184378075-184380073	1998	31	47
MIG	CXCL9	001_ENST00000264888	chr4:76,928,539-76,932,353	chr4:76007386-76011200	3814	4	23
GM-CSF	CSF2	001_ENST00000296871	chr5:131,398,897-131,409,675	chr5:132063204-132073982	10778	40	59
MIP-1d	CCL15	001_ENST00000354059	chr17:34,328,456-34,340,098	chr17:36001417-36013058	11642	45	64
IL-4	IL4	001_ENST00000231449	chr5:131,996,802-132,009,877	chr5:132661110-132674185	13075	76	95
MCP-3	CCL7	001_ENST00000378569	chr17:32,584,222-32,597,385	chr17:34257203-34270366	13163	9	24
TNF-b	LTA	002_ENST00000454783	chr6:31,526,606-31,540,079	chr6:31558829-31572302	13473	79	91
IL-15	IL5	001_ENST00000231454	chr5:131,879,027-131,892,616	chr5:132543335-132556924	13589	82	94
IL-13	IL13	001_ENST00000304506	chr5:131,980,313-131,994,052	chr5:132644621-132658360	13739	49	67
GRO-a	CXCL1	001_ENST00000395761	chr4:74,719,872-74,735,287	chr4:73854155-73869570	15415	25	38
GCSF	CSF3	001_ENST00000225474	chr17:38,154,213-38,171,767	chr17:39997960-40015514	17554	56	72
Oncostatin_M	OSM	001_ENST00000215781	chr22:30,662,755-30,681,227	chr22:30266766-30285238	18472	24	41
TARC	CCL17	001_ENST00000219244	chr16:57,418,960-57,438,748	chr16:57385048-57404836	19788	45	64
TGF-B1	TGFB1	001_ENST00000221930	chr19:41,858,595-41,882,129	chr19:41352690-41376224	23534	106	120
IL-10	IL10	001_ENST00000423557	chr1:206,945,616- 206,972,215	chr1:206772271-206798870	26599	59	77
MCP-2	CCL8	001_ENST00000394620	chr17:32,615,353-32,646,596	chr17:34288334-34319577	31243	19	33
RANTES	CCL5	001_ENST00000293272	chr17:34,207,234-34,245,070	chr17:35880230-35918066	37837	65	83
ENA-78	CXCL5	001_ENST00000296027	chr4:74,864,190- 74,902,306	chr4:73998473-74036589	38116	35	55
EGF	EGF	001_ENST00000265171	chr4:110,793,471-110,834,618	chr4:109872315-109913462	41147	27	46
IFN-g	IFNG	001_ENST00000229135	chr12:68,553,282-68,595,131	chr12:68159502-68201351	41849	27	50
Anqioqenin	ANG	001_ENST00000336811	chr14:21,109,850-21,152,917	chr14:20641691-20684758	43067	119	131
IL-1a	IL1A	001_ENST00000263339	chr2:113,542,020-113,587,328	chr2:112784443-112829751	45308	92	107
IL-3	IL3	001_ENST00000296870	chr5:131,347,355-131,396,561	chr5:132011662-132060868	49206	61	77
GRO	CXCL2	001_ENST00000508487	chr4:74,964,738-75,023,890	chr4:74099021-74158173	59152	102	117
PDGF_BB	PDGFB	001_ENST00000331163	chr22:39,639,906-39,708,889	chr22:39243901-39312884	68983	116	125
MDC	CCL22	001_ENST00000219235	chr16:57,318,599-57,392,801	chr16:57284687-57358889	74202	122	140
IL-1b	IL1B	001_ENST00000263341	chr2:113,594,285-113,670,548	chr2:112836708-112912971	76263	76	91
VEGF	VEGFA	001_ENST00000372067	chr6:43,739,049-43,655,528	chr6:43687791-43771312	83521	134	142
IL-12	IL12A	001_ENST00000305579	chr3:159,615,147-159,706,961	chr3:159897358-159989174	91817	84	98
MCP-1	CCL2	001_ENST00000225831	chr17:32,484,313-32,582,444	chr17:34157294-34255425	98131	70	86
IL-8	IL8	001_ENST00000307407	chr4:74,486,265-74,606,439	chr4:73620548-73740722	120174	90	110
MCSF	CSF1	001_ENST00000329608	chr1:110,306,649-110,453,684	chr1:109764027-109911062	147035	124	139
Leptin	LEP	001_ENST00000308868	chr7:127,732,659-127,881,359	chr 7:128092607-128241306	148700	111	124
IL-2	IL2	001_ENST00000226730	chr4:123,377,449-123,533,783	chr4:122456294-122612628	156334	63	85
I-309	CCL1	001_ENST00000225842	chr17:32,690,105-32,901,142	chr17:34363086-34574123	211037	70	85
IL-6	IL6	001_ENST00000404625	chr7:22,539,796-22,765,877	chr7:22500177-22726258	226081	120	132
IGF-1	IGF1	001_ENST00000337514	chr12:102,874,097-103,230,663	chr12:102480319-102836885	356566	95	113
IL-15	IL15	001_ENST00000296545	chr4:142,155,851-142558377	chr4:141234697-141637224	402528	90	108
SDF-1	CXCL12	002_ENST00000374429	chr10:44,880,393-45,406,648	chr10:44384945-44911200	526255	80	95
IL-12	IL12B	001_ENST00000231228	chr5:158,757,440-159,343,790	chr5:159330432-159916783	586352	111	121
SCF	KITLG	001_ENST00000347404	chr12:88,974,041-89,741,009	chr12:88580264-89347232	766968	112	132
IL-7	IL7	001_ENST00000263851	chr8:79,717,148- 80,523,049	chr8:78804913-79610814	805901	83	95

## Sheet: Nomenclature
HGNC_name	Acronyma
SMARCC1	ChromRem
SMARCC2	ChromRem
SMARCA4	ChromRem
SMARCB1	ChromRem
BPTF	ChromRem
CHD1	ChromRem
CHD2	ChromRem
HLTF	ChromRem
RPS8	RNAbinding
RAD21	DNARep
SMC3	DNARep
WRNIP1	DNARep
MBD4	DNARep
EP300	HISase
SIN3A	HISase
SIRT6	HISase
TRIM28	HISase
SETDB1	HISase
SUZ12	HISase
CBX3	HISase
EZH2	HISase
HDAC1	HISase
HDAC2	HISase
HDAC6	HISase
HDAC8	HISase
KDM5A	HISase
KDM5B	HISase
MTA3	HISase
PHF8	HISase
RBBP5	HISase
RCOR1	HISase
SAP30	HISase
CCNT2	Cyclin
POLR2A	Pol2
BDP1	Pol3F
BRF1	Pol3F
POLR3A	Pol3F
POLR3G	Pol3F
GTF3C2	Pol3F
GTF2B	TFNS
GTF2F1	TFNS
TAF1	TFNS
TAF7	TFNS
CBFB	TFNS
CTBP2	TFNS
HMGN3	TFNS
TBP	TFNS
AHR	TFSS
ALX1	TFSS
ARID3A	TFSS
ARNT	TFSS
ATF1	TFSS
ATF2	TFSS
ATF3	TFSS
BACH1	TFSS
BACH2	TFSS
BATF	TFSS
BCL11A	TFSS
BCL3	TFSS
BCL6	TFSS
BCLAF1	TFSS
BHLHE40	TFSS
BRCA1	TFSS
CDX1	TFSS
CEBPB	TFSS
CEBPD	TFSS
CREB1	TFSS
CRX	TFSS
CTCF	TFSS
CTCFL	TFSS
DMRT3	TFSS
E2F1	TFSS
E2F4	TFSS
E2F6	TFSS
EBF1	TFSS
EGR1	TFSS
ELF1	TFSS
ELK1	TFSS
ELK4	TFSS
ESR1	TFSS
ESRRA	TFSS
ETS1	TFSS
ETV7	TFSS
FOS	TFSS
FOSL1	TFSS
FOSL2	TFSS
FOXA1	TFSS
FOXA2	TFSS
FOXM1	TFSS
FOXP2	TFSS
GABPA	TFSS
GATA1	TFSS
GATA2	TFSS
GATA3	TFSS
GFI1	TFSS
HIC1	TFSS
HIF1A	TFSS
HNF4A	TFSS
HNF4G	TFSS
HOXA7	TFSS
HSF1	TFSS
IKZF1	TFSS
IRF1	TFSS
IRF3	TFSS
IRF4	TFSS
JUN	TFSS
JUNB	TFSS
JUND	TFSS
LEF1	TFSS
LHX3	TFSS
LMO2	TFSS
MAFF	TFSS
MAFK	TFSS
MEF2A	TFSS
MEF2C	TFSS
MEIS1	TFSS
MAX	TFSS
MAZ	TFSS
MYB	TFSS
MYBL2	TFSS
MYC	TFSS
MXI1	TFSS
NANOG	TFSS
NFATC1	TFSS
NFE2	TFSS
NFE2L1	TFSS
NFIA	TFSS
NFIC	TFSS
NFIL3	TFSS
NFYA	TFSS
NFYB	TFSS
NKX2-1	TFSS
NKX2-2	TFSS
NKX2-5	TFSS
NKX3-1	TFSS
NOBOX	TFSS
NRF1	TFSS
NR2F2	TFSS
NR3C1	TFSS
NR5A1	TFSS
NR5A2	TFSS
ONECUT1	TFSS
PML	TFSS
PAX4	TFSS
PAX5	TFSS
PBX3	TFSS
PDX1	TFSS
POU2F2	TFSS
POU5F1	TFSS
PPARGC1A	TFSS
PRDM1	TFSS
SPI1	TFSS
RBPJ	TFSS
RELA	TFSS
REST	TFSS
RORA	TFSS
RUNX2	TFSS
RUNX3	TFSS
RFX5	TFSS
RXRA	TFSS
SMAD3	TFSS
SIX5	TFSS
SOX10	TFSS
SP1	TFSS
SP2	TFSS
SP4	TFSS
SPZ1	TFSS
SREBP1	TFSS
SREBF2	TFSS
SRF	TFSS
SRY	TFSS
STAT1	TFSS
STAT2	TFSS
STAT3	TFSS
STAT5A	TFSS
SUPT20H	TFSS
TAL1	TFSS
TBL1XR1	TFSS
TBX5	TFSS
TCF12	TFSS
TCF3	TFSS
TCF7L2	TFSS
TEAD4	TFSS
TFAP2A	TFSS
TFAP2C	TFSS
TFCP2	TFSS
TFE3	TFSS
THAP1	TFSS
TP53	TFSS
NR2C2	TFSS
UBTF	TFSS
USF1	TFSS
USF2	TFSS
VSX2	TFSS
WT1	TFSS
YY1	TFSS
ZBTB18	TFSS
ZBTB33	TFSS
ZBTB7A	TFSS
ZEB1	TFSS
ZIC3	TFSS
ZKSCAN1	TFSS
ZNF143	TFSS
ZNF217	TFSS
ZNF219	TFSS
ZNF263	TFSS
ZNF274	TFSS
ZNF354C	TFSS
ZNF384	TFSS
ZZZ3	TFSS

## Sheet: MatrixTFs&mRNAseqRoadmap
PolyA_RNA-seq			TF	ANG	CSF3	CSF2	CXCL1	IFNG	IGF1	IL10	IL13	IL15	IL1A	IL3	IL5	IL6	IL7	LEP	CCL2	CCL8	CCL7	CCL22	CXCL9	KITLG	TGFB1			EGF	CXCL5	CCL1	IL12A	IL12B	IL1B	IL2	IL4	CSF1	CCL15	OSM	PDGFB	CXCL12	CCL17	THPO	VEGFA			IL8	CXCL2	CCL5	TNF
5.09	ENCSR463JBR	CD4-positive, alpha-beta T cell	AHR	0	0	1	0	0	0	1	1	0	0	0	1	0	1	1	0	0	0	1	0	0	1			0	0	0	1	0	0	0	1	0	0	0	1	0	0	0	1			0	0	1	0
0.03	ENCSR463JBR	CD4-positive, alpha-beta T cell	ALX1	0	0	0	0	0	0	0	1	1	0	0	0	0	0	0	0	0	0	0	0	0	0			0	1	0	0	0	0	0	0	0	0	0	0	0	0	0	0			0	0	0	0
2.65	ENCSR463JBR	CD4-positive, alpha-beta T cell	ARID3A	1	1	0	0	0	1	0	1	0	1	0	0	1	1	1	0	1	0	1	0	1	1			0	0	1	0	1	0	1	0	1	1	0	1	1	0	0	1			1	1	1	0
4.54	ENCSR861QKF	CD8-positive, alpha-beta T cell	ARNT	0	1	1	0	0	0	0	1	1	0	1	1	0	1	1	0	0	0	1	0	0	1			0	1	1	1	1	0	0	1	0	0	0	1	1	1	1	1			0	1	0	0
5.15	ENCSR545MEZ	CD4-positive, alpha-beta T cell	ATF1	0	0	1	0	1	1	0	1	0	1	1	1	1	1	1	1	0	0	0	0	1	1			0	0	1	0	1	0	1	1	1	0	0	1	1	0	0	1			1	1	1	0
5.33	ENCSR861QKF	CD8-positive, alpha-beta T cell	ATF2	1	0	0	0	1	1	1	0	1	1	1	0	1	1	1	1	0	0	1	0	1	1			1	0	1	1	1	1	1	1	1	1	0	1	1	1	0	1			1	1	1	1
4.57	ENCSR861QKF	CD8-positive, alpha-beta T cell	ATF3	1	1	0	0	1	1	0	1	1	1	0	1	1	0	1	1	0	0	1	0	1	1			0	1	1	0	1	0	0	1	1	0	0	1	1	0	0	1			1	1	0	0
4.18	ENCSR763CQW	T-cell	BACH1	1	0	0	0	0	1	0	0	0	1	0	1	1	0	1	1	0	0	1	0	0	1			0	0	1	1	1	0	0	0	1	0	0	0	1	0	0	1			1	1	0	0
4.02	ENCSR763CQW	T-cell	BACH2	0	1	0	0	0	0	0	0	0	0	0	0	0	0	0	0	0	0	0	0	1	0			0	0	0	0	0	0	0	0	1	1	0	0	0	0	0	0			1	0	0	0
5.53	ENCSR944FLL	CD8-positive, alpha-beta T cell	BATF	1	0	0	0	0	1	1	0	1	1	1	1	1	1	1	1	1	0	1	0	1	0			1	0	1	1	1	1	1	1	1	1	0	1	1	1	0	1			1	0	1	1
1.76	ENCSR545MEZ	CD4-positive, alpha-beta T cell	BCL11A	1	0	0	0	0	1	1	0	1	1	1	0	1	1	1	0	0	0	1	0	1	0			0	0	1	1	1	1	1	1	1	1	0	1	1	1	0	1			1	0	1	0
4.34	ENCSR463JBR	CD4-positive, alpha-beta T cell	BCL3	0	0	0	0	0	1	1	1	1	1	1	1	1	0	1	1	0	0	1	0	1	1			1	1	0	1	1	1	0	1	1	1	0	1	0	1	0	1			1	1	1	1
4.32	ENCSR861QKF	CD8-positive, alpha-beta T cell	BCL6	0	1	0	0	1	1	0	0	0	1	0	0	1	0	0	1	0	0	1	0	0	1			0	1	1	0	0	0	0	0	0	0	0	0	0	0	0	0			1	0	0	0
7.09	ENCSR861QKF	CD8-positive, alpha-beta T cell	BCLAF1	1	0	0	0	0	1	0	0	1	1	1	0	0	0	1	1	0	0	1	0	0	1			0	0	0	1	0	1	0	1	0	0	0	1	0	0	0	1			0	1	0	0
5.05	ENCSR861QKF	CD8-positive, alpha-beta T cell	BDP1	1	0	0	0	0	0	0	0	0	0	0	0	0	0	0	0	0	0	1	0	0	0			0	0	0	0	0	0	0	0	0	0	0	0	0	0	0	0			0	0	0	0
6.21	ENCSR861QKF	CD8-positive, alpha-beta T cell	BHLHE40	1	1	0	0	0	1	1	1	1	1	1	1	1	1	1	0	0	0	1	0	1	1			0	0	0	1	1	1	0	1	1	1	0	1	1	0	1	1			1	1	1	1
6.39	ENCSR763CQW	T-cell	BPTF	0	0	0	0	0	0	0	0	0	0	0	0	1	0	0	0	0	0	0	0	0	0			0	0	0	0	0	0	0	0	0	0	0	0	0	0	0	0			0	0	0	0
1.81	ENCSR944FLL	CD8-positive, alpha-beta T cell	BRCA1	1	0	0	1	1	1	1	1	0	1	1	1	1	1	0	1	1	1	1	1	1	1			0	1	1	0	1	1	1	1	1	1	1	1	1	1	1	1			0	1	1	1
4.28	ENCSR861QKF	CD8-positive, alpha-beta T cell	BRF1	1	0	0	0	0	0	0	0	0	0	0	0	0	0	0	0	0	0	1	0	0	0			0	0	0	0	0	0	0	0	0	0	0	0	0	0	0	0			0	0	0	0
6.05	ENCSR861QKF	CD8-positive, alpha-beta T cell	CBFB	1	0	1	1	0	0	1	0	0	0	1	0	0	0	0	1	1	1	1	1	0	0			0	0	1	0	0	0	0	0	0	1	0	0	0	0	0	0			0	0	0	1
6.92	ENCSR545MEZ	CD4-positive, alpha-beta T cell	CBX3	1	0	1	0	0	1	0	1	1	1	0	1	1	0	1	0	0	0	1	0	0	0			0	1	0	0	1	1	1	1	1	0	0	1	1	0	0	1			1	1	0	0
5.31	ENCSR861QKF	CD8-positive, alpha-beta T cel	CCNT2	0	0	1	0	0	0	0	1	0	0	1	1	1	0	1	0	0	0	1	0	1	1			0	0	0	0	1	0	1	0	1	0	0	1	0	0	0	1			1	1	0	0
0.07	ENCSR463JBR	CD4-positive, alpha-beta T cell	CDX1	0	1	1	0	1	1	1	0	1	1	0	0	1	0	0	1	0	1	0	1	1	0			1	1	0	0	0	1	1	1	1	1	1	0	0	0	0	0			1	1	1	0
4.63	ENCSR545MEZ	CD4-positive, alpha-beta T cell	CEBPB	1	1	1	0	1	1	1	1	1	1	1	1	1	1	1	1	1	1	1	0	1	1			1	1	1	1	1	1	1	1	1	0	1	1	1	1	0	1			1	1	1	1
4.1	ENCSR545MEZ	CD4-positive, alpha-beta T cell	CEBPD	1	0	0	0	0	0	0	0	0	1	0	0	0	1	0	0	0	0	1	0	0	1			0	0	0	0	0	0	0	0	1	0	0	0	1	0	1	1			1	1	0	0
5.71	ENCSR463JBR	CD4-positive, alpha-beta T cell	CHD1	1	0	0	0	0	1	0	0	0	1	0	0	0	1	0	0	0	0	1	0	0	1			0	0	0	0	1	0	0	1	1	0	0	0	0	0	0	1			0	1	0	1
7.5	ENCSR763CQW	T-cell	CHD2	1	0	0	0	0	1	1	0	1	1	0	1	1	1	1	0	0	0	1	0	1	1			0	0	1	1	1	1	0	1	1	0	0	1	1	1	1	1			1	1	1	1
5.68	ENCSR763CQW	T-cell	CREB1	1	1	0	0	0	1	0	0	1	1	0	1	1	1	0	1	0	0	1	0	0	1			0	0	0	1	1	0	0	0	1	0	0	1	1	0	0	1			0	1	0	0
0.04	ENCSR463JBR	CD4-positive, alpha-beta T cell	CRX	0	0	1	0	1	0	0	1	0	0	0	1	1	0	0	0	0	0	0	0	0	0			0	0	1	0	0	0	0	1	0	1	0	0	1	1	1	0			0	0	0	0
4.58	ENCSR861QKF	CD8-positive, alpha-beta T cell	CTBP2	1	0	0	0	0	0	0	0	1	0	0	1	1	1	0	1	0	0	0	0	0	0			0	0	1	0	0	0	0	0	0	0	0	1	0	0	0	1			0	0	0	0
5.38	ENCSR861QKF	CD8-positive, alpha-beta T cell	CTCF	1	1	1	1	1	1	1	1	1	1	1	0	1	1	1	1	1	0	1	0	1	1			1	1	1	1	1	1	1	1	1	1	1	1	1	0	1	1			1	1	1	1
0.01	ENCSR763CQW	T-cell	CTCFL	0	1	0	1	0	0	1	0	0	0	0	0	1	0	1	0	0	0	0	0	0	1			0	0	1	1	0	0	0	0	1	0	0	0	1	0	0	1			1	0	1	0
0.01	ENCSR545MEZ	CD4-positive, alpha-beta T cell	DMRT3	0	0	0	0	0	0	0	0	0	0	0	0	0	0	0	0	0	0	0	0	0	0			0	0	0	0	0	0	1	0	0	0	0	0	0	0	0	0			0	0	0	0
1.53	ENCSR463JBR	CD4-positive, alpha-beta T cell	E2F1	1	0	0	0	0	0	0	0	0	0	0	1	0	1	1	0	0	0	0	0	1	1			0	0	0	0	1	1	0	0	1	0	0	1	0	0	0	1			1	1	0	0
5.89	ENCSR861QKF	CD8-positive, alpha-beta T cell	E2F4	1	0	0	0	0	1	0	0	1	1	0	1	1	0	1	0	0	0	1	0	1	1			0	1	0	0	1	0	0	0	1	0	0	1	1	0	0	1			0	1	0	0
2.81	ENCSR861QKF	CD8-positive, alpha-beta T cell	E2F6	1	0	1	1	0	0	0	0	0	1	0	1	1	0	1	1	0	0	1	0	1	1			0	0	0	1	1	0	0	1	1	1	0	1	1	0	0	1			1	1	1	0
0.5	ENCSR463JBR	CD4-positive, alpha-beta T cell	EBF1	1	0	0	0	1	1	1	1	1	1	1	1	1	1	1	1	1	0	1	0	1	1			1	0	1	1	1	1	1	1	1	0	1	1	1	1	0	1			0	1	1	1
9.99	ENCSR861QKF	CD8-positive, alpha-beta T cell	EGR1	1	0	1	1	0	1	1	1	0	1	1	1	1	0	1	1	0	0	1	0	1	1			0	0	1	1	1	1	1	1	1	1	1	1	1	0	1	1			0	1	1	1
6.62	ENCSR861QKF	CD8-positive, alpha-beta T cell	ELF1	1	1	1	1	1	1	1	0	1	1	1	1	1	0	1	1	0	0	1	0	1	1			0	0	1	1	1	1	0	1	1	0	0	1	1	1	1	1			1	1	1	1
4.68	ENCSR545MEZ	CD4-positive, alpha-beta T cell	ELK1	1	0	0	0	0	0	1	0	1	0	0	1	0	0	1	0	0	0	1	0	0	0			0	0	0	0	0	0	0	0	1	0	0	0	0	0	0	1			0	1	0	0
6.35	ENCSR763CQW	T-cell	ELK4	1	0	0	0	0	0	0	0	0	0	0	1	1	0	0	0	0	0	0	0	1	0			0	0	0	0	0	1	0	0	1	0	0	0	0	0	0	1			0	1	0	0
6.09	ENCSR763CQW	T-cell	EP300	1	1	1	1	1	1	1	1	1	1	1	1	1	1	1	1	1	1	1	0	1	1			1	1	1	1	1	1	1	1	1	1	0	1	1	1	0	1			1	1	1	1
2.23	ENCSR463JBR	CD4-positive, alpha-beta T cell	ESR1	0	0	0	0	1	1	1	0	1	0	0	0	1	0	1	0	0	0	0	0	1	1			0	0	1	1	1	0	1	0	1	0	0	1	1	0	0	1			1	1	1	0
4.29	ENCSR944FLL	CD8-positive, alpha-beta T cell	ESRRA	0	0	0	0	0	0	0	0	0	0	0	0	0	0	1	0	0	0	0	0	0	0			0	0	0	0	0	0	0	0	0	0	0	0	0	0	0	0			0	0	0	0
9.68	ENCSR545MEZ	CD4-positive, alpha-beta T cell	ETS1	1	0	0	0	0	0	0	1	1	0	0	1	1	0	1	0	0	0	1	0	1	1			0	0	0	0	0	0	0	1	1	0	0	1	0	0	0	1			0	1	0	1
1.57	ENCSR463JBR	CD4-positive, alpha-beta T cell	ETV7	0	0	0	0	0	0	0	0	0	0	0	0	0	0	0	1	0	0	0	0	0	0			0	0	0	0	0	0	0	0	0	0	0	0	0	0	0	0			0	0	0	0
3.47	ENCSR463JBR	CD4-positive, alpha-beta T cell	EZH2	0	0	0	0	0	0	0	1	1	0	1	0	1	1	1	1	0	0	1	0	0	0			0	0	1	0	1	0	0	0	0	0	0	1	1	0	1	1			0	0	0	0
12.3	4 ENCSR861QK	F CD8-positive, alpha-beta T cell	FOS	1	1	1	1	1	1	0	0	1	1	0	1	1	1	1	1	1	1	1	0	1	1			0	1	1	1	1	1	1	0	1	0	1	1	1	1	0	1			1	1	0	0
0.86	ENCSR861QKF	CD8-positive, alpha-beta T cell	FOSL1	1	1	0	0	0	0	0	1	1	1	0	0	1	0	1	0	0	0	0	0	0	0			0	0	0	0	1	1	0	0	1	0	0	1	0	0	0	1			1	1	1	0
5.55	ENCSR861QKF	CD8-positive, alpha-beta T cell	FOSL2	1	1	0	1	1	1	0	0	1	1	0	0	1	1	1	1	0	0	1	0	1	1			0	1	0	1	1	1	0	0	1	0	0	1	1	0	0	1			1	1	0	0
0.12	ENCSR763CQW	T-cell	FOXA1	1	1	1	0	1	1	1	1	1	1	0	0	1	1	1	1	0	0	1	0	1	1			0	1	1	1	1	1	1	1	1	1	0	1	1	1	0	1			1	1	0	0
0.04	ENCSR763CQW	T-cell	FOXA2	1	1	1	0	0	1	0	1	1	1	0	0	1	1	1	0	0	0	1	0	1	0			0	1	1	1	1	1	0	1	1	1	0	1	1	0	0	1			1	1	0	0
2.27	ENCSR463JBR	CD4-positive, alpha-beta T cell	FOXM1	1	0	0	0	1	1	1	0	1	1	1	1	1	0	1	1	0	0	1	0	1	1			1	0	1	1	1	1	1	1	1	1	0	1	0	1	0	1			1	0	1	1
0.19	ENCSR763CQW	T-cell	FOXP2	0	1	0	0	0	0	0	0	1	1	0	1	0	1	1	1	0	0	1	0	1	1			0	0	0	1	1	0	0	0	1	0	1	1	1	0	0	1			1	1	0	0
4.54	ENCSR545MEZ	CD4-positive, alpha-beta T cell	GABPA	1	1	0	0	0	1	0	1	1	1	0	1	1	1	1	1	0	0	1	0	1	1			0	1	0	1	1	1	0	1	1	0	0	1	0	0	1	1			1	1	0	0
0.26	ENCSR861QKF	CD8-positive, alpha-beta T cell	GATA1	0	1	0	0	0	0	0	1	1	0	0	1	1	1	1	0	0	0	0	0	1	1			0	0	1	0	1	1	0	1	1	1	1	0	1	1	0	1			1	1	0	0
0.72	ENCSR861QKF	CD8-positive, alpha-beta T cell	GATA2	1	1	1	0	0	1	0	1	1	1	1	1	1	1	1	1	0	1	1	0	1	1			0	1	1	1	1	1	1	1	1	0	1	1	1	0	1	1			1	1	1	0
5.81	ENCSR463JBR	CD4-positive, alpha-beta T cell	GATA3	1	1	0	0	1	1	1	1	1	1	1	0	1	1	1	1	0	0	1	1	1	0			0	0	1	1	1	1	1	0	1	0	0	1	1	1	1	1			1	1	1	0
4.73	ENCSR861QKF	CD8-positive, alpha-beta T cell	GFI1	0	0	1	0	1	1	1	0	1	1	0	1	0	1	0	0	1	0	1	1	1	0			1	1	0	1	0	1	1	1	1	1	0	0	1	1	0	0			1	0	0	1
5.21	ENCSR763CQW	T-cell	GTF2B	0	0	0	0	0	0	0	0	1	0	0	1	0	0	0	0	0	0	0	0	0	0			0	0	0	0	0	0	0	1	0	0	0	0	0	0	0	1			0	1	0	0
5.98	ENCSR545MEZ	CD4-positive, alpha-beta T cell	GTF2F1	1	1	0	0	0	0	0	0	1	1	0	1	1	0	1	1	0	0	1	0	1	1			0	1	0	0	1	1	0	1	1	0	0	1	0	0	0	1			0	1	0	0
5.47	ENCSR861QKF	CD8-positive, alpha-beta T cell	GTF3C2	1	0	0	0	0	0	0	0	0	0	0	0	0	0	0	0	0	0	1	0	1	1			0	0	0	0	0	0	0	0	1	0	0	0	0	0	0	1			0	0	0	0
7.21	ENCSR861QKF	CD8-positive, alpha-beta T cell	HDAC1	0	0	1	0	0	1	0	0	0	0	1	1	1	0	1	0	0	0	1	0	0	1			0	0	0	0	0	0	0	0	1	0	0	0	0	0	0	1			0	1	0	0
5.67	ENCSR545MEZ	CD4-positive, alpha-beta T cell	HDAC2	1	1	1	0	0	1	0	1	0	1	1	1	1	1	1	0	0	0	1	0	1	1			0	1	0	1	1	0	0	0	1	0	0	1	1	0	1	1			1	1	0	0
5.59	ENCSR861QKF	CD8-positive, alpha-beta T cell	HDAC6	0	0	0	0	0	0	0	0	0	0	0	0	0	0	0	0	0	0	1	0	0	0			0	0	0	0	0	0	0	0	0	0	0	0	0	0	0	0			0	0	0	0
3.41	ENCSR861QKF	CD8-positive, alpha-beta T cell	HDAC8	0	0	0	0	0	0	0	0	0	0	0	0	1	0	0	0	0	0	0	0	0	0			0	0	0	0	0	0	0	1	1	0	0	0	0	0	0	1			0	0	0	0
1.8	ENCSR861QKF	CD8-positive, alpha-beta T cell	HIC1	0	0	1	0	0	0	0	0	0	0	0	1	0	0	0	0	0	0	0	0	0	1			0	0	0	1	0	1	0	0	0	0	1	0	0	0	0	0			0	0	0	0
5.99	ENCSR463JBR	CD4-positive, alpha-beta T cell	HIF1A	0	0	0	0	0	0	0	1	0	0	0	0	0	0	0	0	0	0	0	0	0	0			0	0	0	0	1	0	0	0	0	0	0	0	0	0	0	1			0	0	0	0
3.67	ENCSR944FLL	CD8-positive, alpha-beta T cell	HLTF	1	1	1	0	1	1	0	0	0	1	1	0	1	0	0	1	0	0	0	1	1	0			1	0	0	1	1	0	1	1	1	1	0	0	1	0	0	0			1	0	0	0
6.07	ENCSR944FLL	CD8-positive, alpha-beta T cell	HMGN3	1	0	0	0	0	0	0	1	0	0	1	1	1	0	1	0	0	0	0	0	0	1			0	0	0	0	1	0	0	0	1	0	0	1	1	0	0	1			1	1	0	0
0.08	ENCSR861QKF	CD8-positive, alpha-beta T cell	HNF4A	1	0	0	0	0	0	0	0	0	1	0	0	0	1	1	0	0	0	1	0	1	0			0	0	0	1	0	0	1	1	1	1	0	1	1	0	1	1			0	1	1	0
0.03	ENCSR763CQW	T-cell	HNF4G	1	0	1	0	0	0	0	0	0	1	0	0	0	1	1	0	0	0	1	0	1	0			0	0	0	1	1	0	1	0	1	1	0	1	0	0	0	1			0	1	1	0
0.15	ENCSR861QKF	CD8-positive, alpha-beta T cell	HOXA7	0	0	0	0	0	1	0	0	0	1	0	0	0	0	0	0	0	0	0	0	0	0			0	1	0	0	0	1	0	0	1	0	0	0	0	0	1	0			0	0	0	0
5.7	ENCSR861QKF	CD8-positive, alpha-beta T cell	HSF1	1	0	0	0	0	0	0	0	0	0	0	0	0	0	0	0	0	0	1	0	0	0			0	0	0	0	0	0	0	0	0	0	0	0	0	0	0	1			0	0	0	0
7.69	ENCSR861QKF	CD8-positive, alpha-beta T cell	IKZF1	0	1	0	1	1	1	0	1	1	0	1	1	0	0	1	1	0	1	1	0	0	1			1	1	0	1	0	0	0	1	1	1	0	0	0	1	0	1			1	0	1	1
7.1	ENCSR763CQW	T-cell	IRF1	1	1	0	0	0	1	0	1	1	0	0	1	1	0	1	0	0	0	1	0	1	1			0	0	1	1	1	0	1	0	1	0	0	1	0	0	0	1			1	1	0	0
7.27	ENCSR463JBR	CD4-positive, alpha-beta T cell	IRF3	1	0	0	0	0	0	0	0	0	0	0	0	0	0	0	0	0	0	0	0	0	0			0	0	0	0	0	0	0	0	0	0	0	0	0	0	0	0			0	0	0	0
3.06	ENCSR545MEZ	CD4-positive, alpha-beta T cell	IRF4	1	1	0	0	0	1	1	0	1	1	1	0	1	1	1	1	0	0	1	0	1	0			1	0	1	1	1	1	1	1	1	1	0	1	0	1	0	1			1	0	0	0
11.1	8 ENCSR861QK	F CD8-positive, alpha-beta T cell	JUN	1	1	1	0	0	1	0	0	1	1	1	0	1	1	1	1	1	1	1	1	1	1			1	0	1	1	1	1	1	0	1	0	0	1	1	1	0	1			1	1	0	0
10.7	6 ENCSR861QK	F CD8-positive, alpha-beta T cell	JUNB	0	0	0	0	1	1	0	1	1	1	0	0	1	0	1	1	0	0	0	0	1	1			0	0	1	1	1	1	0	0	1	0	0	1	0	0	0	1			1	1	0	0
9.48	ENCSR861QKF	CD8-positive, alpha-beta T cell	JUND	1	1	1	0	1	1	0	1	1	1	1	1	1	1	1	1	1	0	1	1	1	1			1	1	1	1	1	1	1	1	1	1	1	1	1	0	1	1			1	1	0	0
6.02	ENCSR763CQW	T-cell	KDM5A	0	0	0	0	0	0	0	0	0	0	0	0	0	0	0	0	0	0	0	0	0	0			0	0	0	0	0	0	0	0	0	0	0	0	0	0	0	1			0	0	0	0
3.84	ENCSR763CQW	T-cell	KDM5B	1	0	0	0	0	0	0	0	0	0	0	1	1	0	0	0	0	0	1	0	0	1			0	0	0	0	0	0	0	1	1	0	0	1	0	0	0	1			1	1	0	0
8.47	ENCSR545MEZ	CD4-positive, alpha-beta T cell	LEF1	0	1	0	0	1	0	1	0	1	0	1	1	1	1	1	0	1	1	0	1	1	0			1	0	1	0	0	1	1	1	1	1	1	0	0	1	0	1			1	1	1	0
0.07	ENCSR861QKF	CD8-positive, alpha-beta T cell	LHX3	0	0	0	0	0	0	0	0	1	0	0	0	0	0	0	0	0	0	0	0	0	0			0	0	0	0	0	0	0	0	0	0	0	0	0	0	0	0			1	0	0	0
3.24	ENCSR545MEZ	CD4-positive, alpha-beta T cell	LMO2	0	0	0	1	1	0	0	1	1	0	1	1	1	1	0	0	0	1	1	0	1	1			0	0	0	1	0	1	0	1	1	0	0	1	0	1	1	0			0	1	0	0
4.49	ENCSR861QKF	CD8-positive, alpha-beta T cell	MAFF	1	1	1	1	0	1	1	0	1	1	1	1	1	1	1	1	1	0	1	0	1	1			1	1	1	1	1	1	1	1	1	0	1	1	1	1	0	1			1	1	0	0
4.25	ENCSR861QKF	CD8-positive, alpha-beta T cell	MAFK	1	1	1	1	0	1	1	0	1	1	1	1	1	1	1	1	1	1	1	0	1	1			1	1	1	1	1	1	1	0	1	0	1	1	1	1	0	1			1	1	0	0
6.58	ENCSR545MEZ	CD4-positive, alpha-beta T cell	MAX	1	1	1	1	0	1	1	1	1	1	1	1	1	1	1	1	0	0	1	0	1	1			1	1	1	1	1	1	1	1	1	1	1	1	1	1	1	1			1	1	1	1
7.41	ENCSR861QKF	CD8-positive, alpha-beta T cell	MAZ	1	1	1	1	0	1	1	1	1	1	1	1	1	1	1	1	0	0	1	0	1	1			0	0	1	1	1	1	1	1	1	1	0	1	1	1	1	1			0	1	1	1
4.88	ENCSR763CQW	T-cell	MBD4	1	0	0	0	0	0	0	0	0	1	0	0	0	0	0	0	0	0	1	0	1	0			0	0	0	0	0	0	0	0	0	0	0	0	0	0	0	1			0	0	0	0
4.57	ENCSR463JBR	CD4-positive, alpha-beta T cell	MEF2A	0	0	0	0	0	1	1	1	1	1	1	0	1	1	1	0	0	0	1	0	1	0			1	0	1	1	1	1	1	1	1	1	0	1	1	1	0	1			1	0	1	1
3.69	ENCSR463JBR	CD4-positive, alpha-beta T cell	MEF2C	1	0	0	0	0	1	0	0	0	1	1	0	1	0	1	0	0	0	1	0	1	1			1	0	0	1	1	0	1	1	1	1	0	1	1	0	0	1			1	0	1	0
0.85	ENCSR861QKF	CD8-positive, alpha-beta T cell	MEIS1	0	1	1	0	0	1	0	0	0	0	1	0	0	0	0	0	1	0	0	0	0	1			1	1	0	0	0	1	0	1	1	0	1	0	0	0	0	0			1	0	1	0
3.89	ENCSR861QKF	CD8-positive, alpha-beta T cell	MTA3	0	0	0	0	0	1	1	0	1	1	1	0	1	1	1	0	0	0	1	0	1	0			0	0	1	1	1	1	1	1	1	1	1	1	0	1	0	1			1	0	1	1
4.89	ENCSR463JBR	CD4-positive, alpha-beta T cell	MXI1	1	1	1	0	1	1	1	0	1	1	1	1	1	1	1	1	0	0	1	0	1	1			0	0	0	1	1	1	0	1	1	1	0	1	0	0	1	1			0	1	1	1
2.27	ENCSR463JBR	CD4-positive, alpha-beta T cell	MYB	1	1	1	1	1	1	1	1	1	1	1	1	1	1	1	1	1	1	1	1	1	1			1	1	1	1	1	1	1	1	0	1	1	1	1	1	1	0			1	1	1	1
1.93	ENCSR463JBR	CD4-positive, alpha-beta T cell	MYBL2	1	0	0	0	0	0	0	0	0	1	0	0	1	0	1	0	0	0	1	0	1	1			0	0	0	0	1	0	0	0	1	0	0	1	0	0	0	1			0	1	0	0
6.55	ENCSR545MEZ	CD4-positive, alpha-beta T cell	MYC	1	1	1	1	0	1	1	0	1	1	1	1	1	1	1	1	0	0	1	0	1	1			1	0	1	1	1	1	1	1	1	0	1	1	1	0	1	1			1	1	1	1
0.14	ENCSR861QKF	CD8-positive, alpha-beta T cell	NANOG	0	0	0	0	0	1	0	0	0	0	0	0	1	1	0	0	0	0	0	0	1	0			0	0	0	0	1	0	0	0	0	0	0	0	1	0	0	0			1	0	0	0
4.75	ENCSR463JBR	CD4-positive, alpha-beta T cell	NFATC1	1	0	0	0	0	1	1	0	1	1	1	0	1	0	1	0	0	0	1	0	1	1			0	0	0	1	1	0	1	1	1	1	0	1	0	1	0	1			1	0	1	1
2.17	ENCSR545MEZ	CD4-positive, alpha-beta T cell	NFE2	0	0	0	0	0	1	0	0	0	0	0	0	1	0	1	0	0	0	0	0	0	0			0	0	1	0	0	0	0	0	1	0	0	0	1	0	0	0			0	0	0	0
5.43	ENCSR861QKF	CD8-positive, alpha-beta T cell	NFE2L1	1	1	1	1	1	1	1	0	1	1	1	0	1	1	1	1	1	1	1	1	0	0			1	1	1	1	1	1	1	1	1	0	1	0	0	0	1	0			1	1	1	0
1.98	ENCSR763CQW	T-cell	NFIA	0	0	0	0	1	0	0	0	0	1	0	0	0	0	1	1	1	0	1	1	0	0			1	1	0	0	1	0	0	0	1	1	1	0	1	0	0	1			1	1	1	0
4.95	ENCSR861QKF	CD8-positive, alpha-beta T cell	NFIC	1	0	0	0	1	1	1	0	1	1	1	1	1	1	1	0	0	0	1	0	1	1			1	1	1	1	1	1	1	1	1	1	1	1	1	1	1	1			1	1	1	1
4.38	ENCSR861QKF	CD8-positive, alpha-beta T cell	NFIL3	0	0	0	0	0	0	0	1	1	0	0	0	0	0	0	0	0	0	0	0	0	0			0	0	1	0	0	0	0	0	0	0	0	0	0	0	0	0			0	0	0	0
4.95	ENCSR861QKF	CD8-positive, alpha-beta T cell	NFYA	1	0	0	0	0	0	0	0	0	0	0	1	1	0	0	1	0	0	0	0	1	1			0	0	0	0	0	0	0	0	1	0	1	1	0	0	0	1			0	0	0	0
4.63	ENCSR944FLL	CD8-positive, alpha-beta T cell	NFYB	1	1	0	0	1	1	0	0	1	0	0	1	1	1	1	0	0	0	1	0	1	1			0	0	1	0	1	0	1	0	1	0	1	1	1	0	1	1			0	0	1	1
0.03	ENCSR944FLL	CD8-positive, alpha-beta T cell	NKX2-1	1	0	1	0	1	0	0	0	0	1	1	0	0	1	0	1	0	1	1	0	0	0			1	1	1	0	1	0	1	1	1	1	1	0	0	1	0	0			1	0	0	1
0.03	ENCSR545MEZ	CD4-positive, alpha-beta T cell	NKX2-2	0	0	0	0	1	1	0	0	0	0	0	0	0	0	0	0	0	0	0	1	0	0			0	0	0	0	0	0	0	0	0	0	0	0	0	0	0	0			0	0	0	0
0.03	ENCSR861QKF	CD8-positive, alpha-beta T cell	NKX2-5	0	1	0	0	0	1	0	0	0	0	1	0	0	1	0	0	0	0	1	0	1	0			1	1	1	0	0	0	1	0	0	0	0	0	0	0	1	0			0	0	1	0
1.13	ENCSR861QKF	CD8-positive, alpha-beta T cell	NKX3-1	0	0	0	0	0	1	0	0	0	0	0	0	0	0	0	0	0	0	0	0	0	0			0	0	0	0	0	0	1	0	0	0	0	0	1	0	0	0			0	0	0	0
0.06	ENCSR944FLL	CD8-positive, alpha-beta T cell	NOBOX	1	0	0	0	1	0	1	1	1	1	1	0	1	0	0	0	1	0	0	1	1	0			1	1	0	1	0	0	1	1	1	1	0	0	1	1	0	0			1	1	1	0
5.19	ENCSR861QKF	CD8-positive, alpha-beta T cell	NR2C2	0	0	0	0	0	0	0	0	0	0	0	0	0	0	0	0	0	0	0	0	0	0			0	0	0	0	0	0	0	0	1	0	0	0	0	0	0	1			0	0	0	0
0.8	ENCSR463JBR	CD4-positive, alpha-beta T cell	NR2F2	0	1	0	0	0	1	0	1	1	1	0	0	1	0	1	0	0	0	1	0	1	1			0	0	1	0	1	0	0	1	1	0	0	1	1	0	0	1			1	0	0	0
5.66	ENCSR763CQW	T-cell	NR3C1	1	1	0	0	1	1	0	0	1	1	0	1	1	1	1	1	0	0	1	0	1	1			0	1	0	1	1	1	1	0	1	0	0	1	1	0	0	1			1	1	0	0
0.11	ENCSR763CQW	T-cell	NR5A1	0	1	0	0	1	0	0	0	0	0	0	0	0	0	1	0	0	1	0	1	1	0			0	0	0	0	0	0	0	0	0	0	0	1	0	0	1	0			0	0	0	0
0.08	ENCSR463JBR	CD4-positive, alpha-beta T cell	NR5A2	1	1	0	0	1	0	1	0	0	0	0	0	1	0	1	1	0	1	1	1	1	0			1	0	0	1	0	0	1	0	0	0	0	0	0	0	0	0			1	0	0	0
4.1	ENCSR944FLL	CD8-positive, alpha-beta T cell	NRF1	1	0	0	0	0	1	0	0	0	0	0	1	0	0	1	0	0	0	1	0	0	1			0	0	0	0	0	0	0	1	0	1	0	0	1	0	0	1			0	0	0	0
0.01	ENCSR545MEZ	CD4-positive, alpha-beta T cell	ONECUT1	0	0	0	0	0	0	0	0	0	1	0	0	0	0	0	0	0	0	0	0	0	0			1	0	0	0	0	0	0	0	0	0	0	0	0	0	0	0			0	0	0	0
0.01	ENCSR545MEZ	CD4-positive, alpha-beta T cell	PAX4	1	1	1	1	1	1	1	1	1	1	1	1	0	0	1	0	0	0	1	0	1	0			0	1	0	1	1	0	1	0	1	1	1	1	1	1	1	1			1	1	0	1
1.24	ENCSR861QKF	CD8-positive, alpha-beta T cell	PAX5	1	0	0	0	1	1	1	0	1	1	1	1	1	1	1	1	0	0	1	0	1	1			0	0	1	1	1	1	0	1	1	1	0	1	0	1	0	1			1	1	1	1
3.65	ENCSR463JBR	CD4-positive, alpha-beta T cell	PBX3	1	0	0	0	0	1	1	0	1	0	0	0	1	0	0	0	0	0	1	0	0	1			0	0	0	1	1	0	0	1	0	0	0	1	0	0	0	1			0	0	0	0
0.01	ENCSR545MEZ	CD4-positive, alpha-beta T cell	PDX1	0	0	0	0	0	0	0	0	0	0	0	0	0	0	0	1	0	0	0	0	1	0			0	0	0	0	0	0	0	0	0	0	0	0	0	0	0	0			0	0	1	0
4.7	ENCSR861QKF	CD8-positive, alpha-beta T cell	PHF8	1	0	0	0	0	0	0	0	0	0	0	1	1	0	1	0	0	0	1	0	0	1			0	0	0	0	1	0	0	0	1	0	0	1	0	0	1	1			0	1	0	0
5.04	ENCSR463JBR	CD4-positive, alpha-beta T cell	PML	1	0	0	0	0	1	1	1	1	1	1	1	1	0	1	0	0	0	1	0	1	1			0	0	0	0	1	1	1	1	1	0	0	1	0	1	0	1			1	1	1	1
6.33	ENCSR861QKF	CD8-positive, alpha-beta T cell	POLR2A	1	1	1	1	0	1	1	1	1	1	1	1	1	1	1	1	1	1	1	0	1	1			1	1	1	1	1	1	1	1	1	1	1	1	1	1	1	1			1	1	1	1
3.5	ENCSR861QKF	CD8-positive, alpha-beta T cell	POLR3A	1	0	0	0	0	0	0	0	0	0	0	0	0	0	0	0	0	0	1	0	0	0			0	0	0	0	0	0	0	0	0	0	0	0	0	0	0	0			0	0	0	0
1.51	ENCSR763CQW	T-cell	POLR3G	1	0	0	0	0	0	0	0	0	0	0	0	1	0	0	0	0	0	1	0	1	0			0	0	0	0	0	0	0	0	0	0	0	0	0	0	0	0			0	0	0	0
4.84	ENCSR463JBR	CD4-positive, alpha-beta T cell	POU2F2	1	1	1	0	1	1	1	0	1	1	1	1	1	1	1	1	0	0	1	0	1	1			0	0	1	1	1	1	0	1	1	1	0	1	0	1	0	1			1	1	1	1
0.52	ENCSR763CQW	T-cell	POU5F1	1	0	0	0	0	0	0	0	1	0	0	0	1	1	0	0	0	0	0	0	1	0			0	0	0	0	1	1	0	0	0	0	0	0	0	0	0	0			0	0	0	0
0.24	ENCSR763CQW	T-cell	PPARGC1A	0	0	0	0	0	0	0	0	0	0	0	0	0	0	0	0	0	0	1	0	0	0			0	0	0	0	0	0	0	0	0	0	0	0	0	0	0	0			0	0	0	0
6.13	ENCSR861QKF	CD8-positive, alpha-beta T cell	PRDM1	0	0	0	0	0	1	0	0	0	0	0	0	1	1	0	0	0	0	1	0	1	0			0	0	0	1	1	0	0	0	1	0	0	1	0	0	0	0			1	1	0	0
6.99	ENCSR944FLL	CD8-positive, alpha-beta T cell	RAD21	1	1	1	1	1	1	1	1	1	1	1	0	1	1	1	1	1	0	1	0	1	1			1	1	1	1	1	1	1	1	1	1	0	1	1	0	0	1			1	1	1	1
3.88	ENCSR763CQW	T-cell	RBBP5	1	0	0	0	0	1	0	1	0	0	0	1	1	1	1	1	0	0	1	0	1	1			0	1	0	0	1	0	0	1	1	0	0	1	1	0	0	1			0	1	0	0
5.24	ENCSR463JBR	CD4-positive, alpha-beta T cell	RBPJ	0	0	1	1	0	0	0	0	1	0	0	1	0	1	0	0	0	0	0	0	1	0			0	0	1	0	1	1	0	0	0	0	0	0	0	1	1	0			0	0	1	0
3.6	ENCSR463JBR	CD4-positive, alpha-beta T cell	RCOR1	1	1	1	0	0	1	0	1	1	1	1	1	1	1	1	1	0	0	1	0	1	1			1	0	1	1	1	1	1	1	1	0	0	1	1	1	0	1			1	1	0	0
6.47	ENCSR861QKF	CD8-positive, alpha-beta T cell	RELA	1	1	0	0	1	1	1	0	1	1	1	1	1	1	1	1	1	0	1	0	1	1			0	0	1	1	1	1	1	1	1	1	1	1	0	1	0	1			1	1	1	1
5.34	ENCSR763CQW	T-cell	REST	1	1	0	0	0	1	1	1	1	1	1	1	1	1	1	1	1	0	1	0	1	1			1	1	1	1	1	0	1	0	1	0	1	1	1	1	0	1			1	1	1	1
5.78	ENCSR861QKF	CD8-positive, alpha-beta T cell	RFX5	1	1	0	0	0	1	0	0	1	1	0	1	1	1	1	1	0	0	1	0	1	1			0	0	0	1	1	0	0	0	1	1	0	1	0	0	1	1			1	1	0	0
6.42	ENCSR861QKF	CD8-positive, alpha-beta T cell	RORA	0	0	1	0	0	0	1	0	0	0	0	0	0	0	0	0	0	0	0	0	0	0			0	0	0	0	0	0	0	0	0	0	0	0	0	0	0	0			0	0	0	0
11.7	3 ENCSR545ME	CD4-positive, alpha-beta T cell	RPS8	0	0	0	0	0	0	1	1	1	0	0	0	0	0	0	0	0	0	0	1	0	0			0	0	0	0	0	0	1	1	0	0	0	0	0	0	0	0			0	0	1	0
4.24	ENCSR463JBR	CD4-positive, alpha-beta T cell	RUNX2	1	0	1	1	1	0	1	0	0	0	1	0	0	1	1	1	1	0	0	1	1	0			0	0	1	0	0	0	1	0	0	1	1	0	0	0	0	1			0	0	0	1
7.95	ENCSR861QKF	CD8-positive, alpha-beta T cell	RUNX3	1	1	1	0	1	1	1	1	1	1	1	1	1	1	1	1	1	0	1	0	1	1			1	0	1	1	1	1	1	1	1	1	1	1	1	1	0	1			1	0	1	1
3.7	ENCSR545MEZ	CD4-positive, alpha-beta T cell	RXRA	1	0	0	0	0	0	0	0	0	1	0	0	0	0	1	0	0	0	1	0	1	1			0	0	0	0	1	0	0	0	1	1	0	1	1	0	1	1			1	0	1	0
3.15	ENCSR861QKF	CD8-positive, alpha-beta T cell	SAP30	0	0	0	0	0	0	0	0	0	0	0	1	0	0	0	0	0	0	0	0	0	1			0	0	0	0	0	0	0	0	0	0	0	0	0	0	0	1			0	1	0	0
5.17	ENCSR861QKF	CD8-positive, alpha-beta T cell	SETDB1	0	0	0	0	0	0	0	1	1	0	0	1	1	1	1	0	0	0	1	0	1	0			0	0	0	1	1	1	1	0	1	0	0	1	1	0	0	1			1	1	1	0
5.49	ENCSR861QKF	CD8-positive, alpha-beta T cell	SIN3A	1	1	1	1	0	1	1	0	1	0	1	1	1	1	1	1	0	1	1	0	1	1			0	1	1	1	1	1	1	1	1	0	0	1	0	1	1	1			1	1	1	1
4.11	ENCSR861QKF	CD8-positive, alpha-beta T cell	SIRT6	1	0	0	0	0	1	0	1	0	1	0	0	1	0	0	0	0	0	0	0	0	1			0	0	0	0	0	0	0	0	1	0	0	0	0	0	0	1			0	0	0	0
1.19	ENCSR861QKF	CD8-positive, alpha-beta T cell	SIX5	1	0	0	0	0	1	0	0	0	0	0	1	1	0	0	0	0	0	1	0	0	1			0	0	0	0	1	0	0	0	1	0	0	0	0	0	0	1			0	0	0	0
5.36	ENCSR463JBR	CD4-positive, alpha-beta T cell	SMAD3	0	0	0	0	0	0	1	0	0	0	0	0	0	0	0	0	0	0	1	0	0	1			0	0	0	0	0	0	0	0	0	0	0	0	0	1	0	0			0	0	0	0
5.71	ENCSR861QKF	CD8-positive, alpha-beta T cell	SMARCA4	0	0	0	0	0	0	0	0	0	0	0	0	1	0	0	0	0	0	0	0	1	1			0	0	0	0	0	0	1	0	0	0	0	0	0	0	0	1			0	1	0	0
5.18	ENCSR861QKF	CD8-positive, alpha-beta T cell	SMARCB1	1	0	0	0	0	0	0	0	0	0	0	1	0	0	0	0	0	0	1	0	1	0			0	0	0	0	0	0	1	0	1	0	0	1	0	0	0	1			0	1	0	0
5.39	ENCSR861QKF	CD8-positive, alpha-beta T cell	SMARCC1	1	0	0	0	0	0	1	0	0	0	0	1	1	1	0	0	0	0	0	0	1	0			0	0	0	0	1	0	0	0	1	0	0	1	0	0	0	1			0	1	0	0
6.12	ENCSR861QKF	CD8-positive, alpha-beta T cell	SMARCC2	1	0	0	0	0	0	0	0	0	0	0	0	1	0	0	0	0	0	0	0	1	0			0	0	0	0	0	0	0	0	1	0	0	0	0	0	0	1			0	0	0	0
4.92	ENCSR545MEZ	CD4-positive, alpha-beta T cell	SMC3	1	1	1	1	0	1	1	0	1	1	0	0	1	1	1	1	0	0	1	0	1	1			0	0	1	1	1	1	1	1	1	1	0	1	1	1	0	1			1	1	0	1
0.06	ENCSR463JBR	CD4-positive, alpha-beta T cell	SOX10	0	0	0	0	1	0	0	0	0	0	0	0	0	0	0	0	0	0	0	0	0	0			0	0	0	0	0	1	1	0	0	0	0	0	0	0	0	0			0	0	0	0
5.38	ENCSR545MEZ	CD4-positive, alpha-beta T cell	SP1	1	0	1	0	0	1	1	0	1	1	1	1	1	1	1	1	0	0	1	0	1	1			0	0	1	1	1	1	1	1	1	1	0	1	1	1	1	1			1	1	1	1
4.94	ENCSR861QKF	CD8-positive, alpha-beta T cell	SP2	0	0	0	0	0	1	0	0	0	0	1	0	0	1	1	0	0	0	0	0	0	1			0	0	1	0	0	0	0	0	0	0	0	0	0	0	0	0			0	0	0	0
5.07	ENCSR763CQW	T-cell	SP4	0	0	0	0	0	0	0	0	0	0	0	1	0	0	0	0	0	0	1	0	0	1			0	0	0	0	0	0	0	0	0	0	0	1	0	0	0	0			0	0	0	0
5.15	ENCSR545MEZ	CD4-positive, alpha-beta T cell	SPI1	1	1	0	0	1	1	1	1	1	1	1	1	1	1	1	1	1	0	1	0	1	1			0	1	1	1	1	1	1	1	1	1	0	1	1	1	0	1			1	1	1	1
0.01	ENCSR545MEZ	CD4-positive, alpha-beta T cell	SPZ1	0	0	0	0	0	0	0	0	0	0	0	0	0	0	0	0	0	1	0	0	1	0			0	0	0	0	0	1	0	0	0	0	0	1	0	1	0	0			0	0	1	0
5.3	ENCSR861QKF	CD8-positive, alpha-beta T cell	SREBF2	1	1	0	0	0	1	1	0	0	1	0	0	0	0	0	0	0	0	1	0	0	0			0	0	0	0	0	0	0	0	0	0	1	0	0	0	0	0			1	0	0	0
5.58	ENCSR861QKF	CD8-positive, alpha-beta T cell	SREBP1	0	0	0	0	0	0	0	0	0	0	0	0	0	0	0	0	0	0	0	0	0	1			0	0	0	0	0	0	0	0	0	0	0	0	0	0	0	0			0	0	0	0
4.49	ENCSR861QKF	CD8-positive, alpha-beta T cell	SRF	1	1	0	0	0	1	1	0	0	0	1	1	0	1	0	1	0	0	1	0	1	1			0	0	0	1	1	0	1	0	1	0	0	1	1	0	0	1			0	1	0	0
0.11	ENCSR763CQW	T-cell	SRY	0	0	0	0	1	1	0	0	0	0	0	0	0	0	0	0	0	1	0	1	1	0			1	0	0	0	0	1	1	0	0	0	0	0	0	1	0	0			0	0	0	0
7.43	ENCSR545MEZ	CD4-positive, alpha-beta T cell	STAT1	1	0	0	0	0	1	0	0	1	1	0	1	1	1	0	1	0	0	1	1	1	1			0	0	0	0	1	1	0	1	1	0	0	1	0	0	1	1			1	1	0	0
6.48	ENCSR463JBR	CD4-positive, alpha-beta T cell	STAT2	0	0	0	0	0	0	0	0	0	0	0	0	1	0	0	0	0	0	0	0	0	1			0	0	0	0	0	0	0	1	1	0	0	1	0	0	1	0			0	0	1	0
6.45	ENCSR861QKF	CD8-positive, alpha-beta T cell	STAT3	1	1	1	1	0	1	1	0	1	1	1	0	1	1	1	1	0	1	1	0	1	1			0	1	1	1	1	1	1	1	1	0	0	1	1	1	0	1			1	1	1	1
5.97	ENCSR463JBR	CD4-positive, alpha-beta T cell	STAT5A	0	0	0	0	0	1	1	1	1	1	1	0	1	1	1	0	0	0	1	0	1	1			0	0	0	1	1	1	1	1	1	1	0	1	0	1	0	1			1	0	1	1
5.96	ENCSR944FLL	CD8-positive, alpha-beta T cell	SUPT20H	0	0	0	0	0	0	0	0	0	0	0	0	1	0	0	0	0	0	0	0	1	0			0	0	0	0	0	0	0	0	0	0	0	0	0	0	0	0			0	0	0	0
5.06	ENCSR861QKF	CD8-positive, alpha-beta T cell	SUZ12	0	0	0	0	0	0	0	0	0	0	0	0	0	0	1	0	0	0	0	0	0	0			0	0	0	0	0	0	0	0	0	0	0	1	0	0	0	1			0	0	0	0
5.19	ENCSR763CQW	T-cell	TAF1	1	0	0	0	0	1	1	1	1	1	0	1	1	1	1	1	0	0	1	0	1	1			0	1	0	1	1	1	0	1	1	1	0	1	1	0	1	1			1	1	1	1
6.84	ENCSR861QKF	CD8-positive, alpha-beta T cell	TAF7	1	0	0	1	0	1	0	0	1	0	0	1	1	1	0	0	0	0	1	0	1	0			0	0	0	0	0	0	0	1	0	0	0	0	0	0	0	1			1	1	0	0
0.8	ENCSR861QKF	CD8-positive, alpha-beta T cell	TAL1	1	1	1	0	0	1	0	1	1	1	0	0	1	0	1	1	0	0	1	0	1	1			1	0	1	0	1	1	1	1	1	0	1	1	1	0	0	1			1	0	1	0
5.75	ENCSR763CQW	T-cell	TBL1XR1	1	0	0	0	0	1	1	1	1	1	1	0	1	0	1	1	0	0	1	0	1	1			0	0	1	1	1	0	1	1	1	0	0	1	1	0	0	1			1	1	1	1
4.03	ENCSR944FLL	CD8-positive, alpha-beta T cell	TBP	1	0	1	1	0	1	0	0	1	1	0	1	1	1	1	1	0	0	1	0	1	1			0	1	1	1	1	1	0	1	1	1	0	1	1	1	1	1			1	1	1	1
0.03	ENCSR861QKF	CD8-positive, alpha-beta T cell	TBX5	0	0	0	0	1	1	0	0	1	1	0	0	0	0	0	0	0	0	0	1	0	0			1	1	0	1	0	0	1	1	0	1	1	0	1	0	0	0			1	1	0	0
5.21	ENCSR861QKF	CD8-positive, alpha-beta T cell	TCF12	1	0	0	0	0	1	1	0	1	1	1	1	1	1	1	1	0	0	1	0	1	1			1	1	1	1	1	1	0	1	1	1	0	1	1	1	0	1			1	1	1	1
5.85	ENCSR861QKF	CD8-positive, alpha-beta T cell	TCF3	1	0	0	0	0	1	1	0	1	1	1	1	1	0	1	0	0	0	1	0	1	1			1	0	1	0	1	1	0	1	1	1	0	1	0	1	0	1			1	0	1	1
2.48	ENCSR861QKF	CD8-positive, alpha-beta T cell	TCF7L2	1	0	0	0	0	1	0	0	1	1	0	1	1	1	1	1	0	0	1	0	1	1			0	1	0	1	1	1	1	0	1	0	0	1	1	0	0	1			1	1	0	0
1.19	ENCSR463JBR	CD4-positive, alpha-beta T cell	TEAD4	1	1	1	1	0	1	1	1	1	1	1	0	1	1	1	1	0	0	1	0	1	1			0	1	1	0	1	1	1	1	1	0	0	1	1	0	0	1			1	1	1	0
0.18	ENCSR463JBR	CD4-positive, alpha-beta T cell	TFAP2A	1	1	0	0	0	0	0	0	1	1	0	0	1	1	1	0	0	0	1	0	1	0			0	0	0	1	1	1	0	0	1	0	0	1	0	1	0	1			1	1	0	0
0.01	ENCSR545MEZ	CD4-positive, alpha-beta T cell	TFAP2C	1	1	0	0	0	0	0	0	1	1	0	0	1	1	1	1	0	0	1	0	1	1			0	0	0	1	1	1	0	0	1	0	0	1	0	1	1	1			1	1	1	0
4.8	ENCSR861QKF	CD8-positive, alpha-beta T cell	TFCP2	0	0	0	1	0	0	0	0	0	0	0	0	0	0	0	0	0	0	0	0	0	0			0	0	0	0	0	0	0	0	0	0	0	0	0	0	0	0			0	0	0	0
4.31	ENCSR463JBR	CD4-positive, alpha-beta T cell	TFE3	1	0	1	1	0	0	1	1	1	0	0	0	0	0	0	0	1	1	0	0	1	1			1	1	1	0	0	0	1	1	1	1	0	0	1	1	1	0			1	1	1	1
3.39	ENCSR944FLL	CD8-positive, alpha-beta T cell	THAP1	1	0	0	0	0	0	0	0	0	0	0	1	0	0	1	0	0	0	1	0	0	0			0	0	0	0	0	0	0	0	0	1	0	0	0	0	0	0			0	1	0	0
5.06	ENCSR463JBR	CD4-positive, alpha-beta T cell	TP53	0	0	0	0	0	0	0	0	0	1	0	0	0	0	0	0	0	0	0	0	0	0			0	0	0	0	0	0	0	0	0	0	0	0	0	0	1	0			0	1	0	0
7.92	ENCSR861QKF	CD8-positive, alpha-beta T cell	TRIM28	1	0	0	0	0	1	0	1	1	1	0	0	1	1	1	1	0	0	1	0	1	1			1	0	0	1	1	1	1	0	1	0	0	1	1	0	0	1			1	1	1	0
6.64	ENCSR861QKF	CD8-positive, alpha-beta T cell	UBTF	1	0	0	1	0	0	0	0	0	0	0	0	1	0	1	0	0	0	1	0	0	1			0	0	0	0	1	0	0	0	1	0	0	1	1	0	0	1			1	1	0	0
5.94	ENCSR545MEZ	CD4-positive, alpha-beta T cell	USF1	1	1	0	0	1	1	1	1	1	1	1	1	1	1	1	1	0	0	1	0	1	1			0	0	1	1	1	1	1	1	1	0	1	1	1	1	1	1			1	1	1	0
7.25	ENCSR463JBR	CD4-positive, alpha-beta T cell	USF2	1	1	0	0	0	1	1	0	0	1	0	1	1	0	1	0	0	0	1	0	1	0			0	0	1	0	1	0	1	1	1	0	0	1	1	1	0	1			0	1	1	0
0.03	ENCSR463JBR	CD4-positive, alpha-beta T cell	VSX2	0	0	0	0	0	0	0	0	0	0	0	0	0	0	0	0	1	0	0	0	0	0			0	0	0	0	0	0	0	0	0	0	0	0	0	0	0	0			0	0	0	0
5.11	ENCSR944FLL	CD8-positive, alpha-beta T cell	WRNIP1	1	0	0	0	0	0	1	0	1	0	0	0	0	1	1	0	0	0	1	0	1	1			0	0	1	0	1	1	0	1	1	0	0	1	1	0	0	1			0	0	1	0
0.04	ENCSR463JBR	CD4-positive, alpha-beta T cell	WT1	0	0	1	1	0	0	0	1	0	0	1	0	0	0	1	1	1	0	1	0	0	1			0	1	0	1	1	0	0	0	0	0	1	1	1	1	1	0			1	1	0	0
5.98	ENCSR861QKF	CD8-positive, alpha-beta T cell	YY1	1	1	1	1	0	1	1	1	1	1	1	1	1	1	1	1	1	0	1	0	1	1			0	0	1	1	1	1	1	1	1	1	0	1	1	0	0	1			1	1	1	1
4.46	ENCSR545MEZ	CD4-positive, alpha-beta T cell	ZBTB18	0	0	0	0	0	0	0	0	0	0	0	0	0	0	0	0	0	0	0	0	1	0			0	0	0	0	0	0	0	0	0	0	0	0	0	0	0	0			0	0	0	0
4.35	ENCSR763CQW	T-cell	ZBTB33	1	0	0	0	0	1	0	0	0	1	1	1	1	0	1	1	0	0	1	0	1	1			0	1	1	1	1	0	0	0	1	0	0	1	0	0	0	1			0	1	0	0
4.74	ENCSR861QKF	CD8-positive, alpha-beta T cell	ZBTB7A	1	1	1	1	0	0	1	0	0	0	0	0	0	0	1	0	0	0	1	0	0	1			0	0	0	1	0	0	0	1	1	0	0	1	0	0	0	1			0	1	1	0
4.87	ENCSR763CQW	T-cell	ZEB1	1	0	0	0	0	0	1	0	1	0	0	0	0	0	0	0	0	0	1	0	1	0			0	0	0	1	1	1	0	0	0	0	0	1	0	0	0	1			0	0	1	0
0.01	ENCSR545MEZ	CD4-positive, alpha-beta T cell	ZIC3	0	0	0	0	0	0	0	1	0	0	0	0	0	0	1	0	0	0	0	0	0	1			0	0	0	0	0	1	0	0	0	1	0	0	1	1	0	0			0	0	0	0
4.56	ENCSR545MEZ	CD4-positive, alpha-beta T cell	ZKSCAN1	0	0	0	0	0	0	0	0	0	0	0	0	1	1	0	0	0	0	1	0	0	0			0	0	1	0	0	0	0	0	1	0	0	1	0	0	0	0			1	1	0	0
4.81	ENCSR944FLL	CD8-positive, alpha-beta T cell	ZNF143	1	1	1	1	0	1	1	0	1	0	1	1	1	1	1	1	1	0	1	0	1	1			0	1	1	1	1	1	1	0	1	0	1	1	1	0	0	1			1	1	0	0
5.67	ENCSR861QKF	CD8-positive, alpha-beta T cell	ZNF217	1	0	0	0	0	1	0	0	0	0	0	0	1	0	0	0	0	0	0	0	1	0			0	0	0	1	1	1	0	0	0	0	0	1	1	0	0	0			0	0	0	0
2.39	ENCSR861QKF	CD8-positive, alpha-beta T cell	ZNF219	0	0	0	0	0	0	0	0	1	0	0	0	0	0	0	0	0	0	0	0	0	0			0	0	0	0	0	0	0	0	0	0	1	0	0	0	0	0			0	0	0	0
5.19	ENCSR944FLL	CD8-positive, alpha-beta T cell	ZNF263	1	0	1	0	0	0	0	0	0	1	1	0	1	0	1	1	0	0	0	0	1	1			0	0	1	1	1	1	1	0	1	0	0	1	1	0	0	1			0	1	1	0
4.86	ENCSR763CQW	T-cell	ZNF274	0	0	0	0	0	0	0	1	0	0	0	0	0	0	0	0	0	0	1	0	1	0			0	0	0	0	0	0	0	0	0	0	0	0	0	0	0	0			0	0	0	0
2.78	ENCSR861QKF	CD8-positive, alpha-beta T cell	ZNF354C	1	1	1	1	1	1	1	1	1	1	1	1	1	1	1	1	1	1	1	1	0	1			1	1	1	1	1	1	1	1	1	1	1	1	1	1	1	1			1	1	1	1
5.74	ENCSR861QKF	CD8-positive, alpha-beta T cell	ZNF384	0	0	0	0	0	1	1	1	0	0	0	0	0	1	0	1	0	0	0	1	1	0			1	0	1	0	0	0	1	1	0	0	1	0	0	0	1	0			0	0	1	0
5.36	ENCSR763CQW	T-cell	ZZZ3	0	0	0	0	0	0	0	0	0	0	0	0	1	0	0	0	0	0	0	0	0	0			0	0	0	1	0	0	0	0	0	0	0	0	1	0	0	0			0	0	0	0
				131	72	59	38	50	113	77	67	108	107	77	94	132	95	124	86	33	24	140	23	132	120			46	55	85	98	121	91	85	95	139	64	41	125	95	64	47	142			110	117	83	53
				Anqioqenin	GCSF	GM-CSF	GRO-a	IFN-g	IGF-1	IL-10	IL-13	IL-15	IL-1a	IL-3	IL-5	IL-6	IL-7	Leptin	MCP-1	MCP-2	MCP-3	MDC	MIG	SCF	TGF-B1			EGF	ENA-78	I-309	IL-12	IL-12-1	IL-1b	IL-2	IL-4	MCSF	MIP-1d	Oncostatin_M	PDGF_BB	SDF-1	TARC	Thrombopoietin	VEGF			IL-8	GRO	RANTES	TNF-a
[truncated: 1 more columns]

## Sheet: TFspercentages
acronym	TF	PolyA_RNA-seq	C1	C2	C3
TFSS	AHR	5.09	36.36	25	20
TFSS	ALX1	0.03	9.09	6.25	0
TFSS	ARID3A	2.65	54.55	50	80
TFSS	ARNT	4.54	45.45	62.5	40
TFSS	ATF1	5.15	59.09	50	80
TFSS	ATF2	5.33	63.64	81.25	100
TFSS	ATF3	4.57	63.64	50	60
TFSS	BACH1	4.18	40.91	37.5	60
TFSS	BACH2	4.02	9.09	12.5	40
TFSS	BATF	5.53	63.64	81.25	80
TFSS	BCL11A	1.76	50	75	60
TFSS	BCL3	4.34	59.09	68.75	100
TFSS	BCL6	4.32	36.36	12.5	40
TFSS	BCLAF1	7.09	40.91	31.25	40
Pol3F	BDP1	5.05	9.09	0	0
TFSS	BHLHE40	6.21	68.18	62.5	100
ChromRem	BPTF	6.39	4.55	0	0
TFSS	BRCA1	1.81	81.82	87.5	60
Pol3F	BRF1	4.28	9.09	0	0
TFNS	CBFB	6.05	45.45	12.5	20
HISase	CBX3	6.92	45.45	56.25	40
Cyclin	CCNT2	5.31	40.91	31.25	40
TFSS	CDX1	0.07	54.55	50	80
TFSS	CEBPB	4.63	90.91	87.5	100
TFSS	CEBPD	4.1	22.73	25	40
ChromRem	CHD1	5.71	27.27	25	60
ChromRem	CHD2	7.5	54.55	68.75	100
TFSS	CREB1	5.68	50	37.5	20
TFSS	CRX	0.04	22.73	37.5	0
TFNS	CTBP2	4.58	27.27	18.75	0
TFSS	CTCF	5.38	86.36	93.75	100
TFSS	CTCFL	0.01	27.27	31.25	40
TFSS	DMRT3	0.01	0	6.25	0
TFSS	E2F1	1.53	27.27	31.25	40
TFSS	E2F4	5.89	45.45	37.5	20
TFSS	E2F6	2.81	50	50	60
TFSS	EBF1	0.5	77.27	81.25	80
TFSS	EGR1	9.99	68.18	81.25	80
TFSS	ELF1	6.62	77.27	68.75	100
TFSS	ELK1	4.68	27.27	12.5	20
TFSS	ELK4	6.35	18.18	18.75	20
HISase	EP300	6.09	95.45	87.5	100
TFSS	ESR1	2.23	36.36	50	60
TFSS	ESRRA	4.29	4.55	0	0
TFSS	ETS1	9.68	40.91	25	60
TFSS	ETV7	1.57	4.55	0	0
HISase	EZH2	3.47	36.36	37.5	0
TFSS	FOS	12.3	81.82	75	60
TFSS	FOSL1	0.86	31.82	31.25	80
TFSS	FOSL2	5.55	63.64	50	60
TFSS	FOXA1	0.12	72.73	81.25	60
TFSS	FOXA2	0.04	54.55	68.75	40
TFSS	FOXM1	2.27	63.64	75	80
TFSS	FOXP2	0.19	45.45	43.75	40
TFSS	GABPA	4.54	63.64	56.25	60
TFSS	GATA1	0.26	40.91	62.5	60
TFSS	GATA2	0.72	77.27	81.25	80
TFSS	GATA3	5.81	72.73	68.75	60
TFSS	GFI1	4.73	54.55	62.5	60
TFNS	GTF2B	5.21	9.09	12.5	20
TFNS	GTF2F1	5.98	50	43.75	20
Pol3F	GTF3C2	5.47	18.18	12.5	0
HISase	HDAC1	7.21	36.36	12.5	40
HISase	HDAC2	5.67	63.64	50	60
HISase	HDAC6	5.59	4.55	0	0
HISase	HDAC8	3.41	4.55	18.75	0
TFSS	HIC1	1.8	13.64	18.75	0
TFSS	HIF1A	5.99	4.55	12.5	0
ChromRem	HLTF	3.67	50	50	20
TFNS	HMGN3	6.07	31.82	31.25	40
TFSS	HNF4A	0.08	27.27	56.25	40
TFSS	HNF4G	0.03	31.82	43.75	40
TFSS	HOXA7	0.15	9.09	25	0
TFSS	HSF1	5.7	9.09	6.25	0
TFSS	IKZF1	7.69	59.09	50	80
TFSS	IRF1	7.1	50	43.75	60
TFSS	IRF3	7.27	4.55	0	0
TFSS	IRF4	3.06	59.09	75	40
TFSS	JUN	11.1	77.27	68.75	60
TFSS	JUNB	10.7	45.45	43.75	60
TFSS	JUND	9.48	86.36	93.75	60
HISase	KDM5A	6.02	0	6.25	0
HISase	KDM5B	3.84	22.73	25	40
TFSS	LEF1	8.47	59.09	62.5	80
TFSS	LHX3	0.07	4.55	0	20
TFSS	LMO2	3.24	54.55	43.75	40
TFSS	MAFF	4.49	81.82	87.5	60
TFSS	MAFK	4.25	86.36	81.25	60
TFSS	MAX	6.58	81.82	100	100
TFSS	MAZ	7.41	81.82	81.25	80
DNARep	MBD4	4.88	18.18	6.25	0
TFSS	MEF2A	4.57	50	81.25	80
TFSS	MEF2C	3.69	40.91	62.5	60
TFSS	MEIS1	0.85	27.27	37.5	40
HISase	MTA3	3.89	45.45	75	80
TFSS	MXI1	4.89	77.27	56.25	60
TFSS	MYB	2.27	100	87.5	80
TFSS	MYBL2	1.93	31.82	25	20
TFSS	MYC	6.55	77.27	81.25	100
TFSS	NANOG	0.14	18.18	12.5	20
TFSS	NFATC1	4.75	50	56.25	80
TFSS	NFE2	2.17	13.64	18.75	20
TFSS	NFE2L1	5.43	81.82	68.75	60
TFSS	NFIA	1.98	31.82	50	60
TFSS	NFIC	4.95	63.64	100	100
TFSS	NFIL3	4.38	9.09	6.25	0
TFSS	NFYA	4.95	27.27	25	0
TFSS	NFYB	4.63	54.55	56.25	40
TFSS	NKX2-1	0.03	40.91	62.5	60
TFSS	NKX2-2	0.03	13.64	0	0
TFSS	NKX2-5	0.03	27.27	31.25	20
TFSS	NKX3-1	1.13	4.55	12.5	0
TFSS	NOBOX	0.06	50	56.25	60
TFSS	NR2C2	5.19	0	12.5	0
TFSS	NR2F2	0.8	45.45	43.75	40
TFSS	NR3C1	5.66	63.64	56.25	60
TFSS	NR5A1	0.11	27.27	12.5	0
TFSS	NR5A2	0.08	50	18.75	20
TFSS	NRF1	4.1	27.27	25	0
TFSS	ONECUT1	0.01	4.55	6.25	0
TFSS	PAX4	0.01	68.18	75	80
TFSS	PAX5	1.24	68.18	62.5	100
TFSS	PBX3	3.65	31.82	31.25	0
TFSS	PDX1	0.01	9.09	0	20
HISase	PHF8	4.7	27.27	31.25	20
TFSS	PML	5.04	59.09	50	100
Pol2	POLR2A	6.33	90.91	100	100
Pol3F	POLR3A	3.5	9.09	0	0
Pol3F	POLR3G	1.51	18.18	0	0
TFSS	POU2F2	4.84	77.27	62.5	100
TFSS	POU5F1	0.52	22.73	12.5	0
TFSS	PPARGC1A	0.24	4.55	0	0
TFSS	PRDM1	6.13	22.73	25	40
DNARep	RAD21	6.99	86.36	81.25	100
HISase	RBBP5	3.88	50	43.75	20
TFSS	RBPJ	5.24	27.27	31.25	20
HISase	RCOR1	3.6	72.73	75	60
TFSS	RELA	6.47	77.27	75	100
TFSS	REST	5.34	77.27	75	100
TFSS	RFX5	5.78	59.09	43.75	40
TFSS	RORA	6.42	9.09	0	0
RNAbinding	RPS8	11.7	18.18	12.5	20
TFSS	RUNX2	4.24	54.55	31.25	20
TFSS	RUNX3	7.95	86.36	87.5	80
TFSS	RXRA	3.7	27.27	43.75	60
HISase	SAP30	3.15	9.09	6.25	20
HISase	SETDB1	5.17	36.36	50	60
HISase	SIN3A	5.49	77.27	75	100
HISase	SIRT6	4.11	27.27	12.5	0
TFSS	SIX5	1.19	27.27	18.75	0
TFSS	SMAD3	5.36	13.64	6.25	0
ChromRem	SMARCA4	5.71	13.64	12.5	20
ChromRem	SMARCB1	5.18	18.18	25	20
ChromRem	SMARCC1	5.39	27.27	25	20
ChromRem	SMARCC2	6.12	13.64	12.5	0
DNARep	SMC3	4.92	68.18	75	80
TFSS	SOX10	0.06	4.55	12.5	0
TFSS	SP1	5.38	68.18	81.25	100
TFSS	SP2	4.94	22.73	6.25	0
TFSS	SP4	5.07	13.64	6.25	0
TFSS	SPI1	5.15	81.82	81.25	100
TFSS	SPZ1	0.01	9.09	18.75	20
TFSS	SREBF2	5.3	27.27	6.25	20
TFSS	SREBP1	5.58	4.55	0	0
TFSS	SRF	4.49	50	43.75	40
TFSS	SRY	0.11	22.73	25	0
TFSS	STAT1	7.43	54.55	43.75	40
TFSS	STAT2	6.48	9.09	25	20
TFSS	STAT3	6.45	77.27	75	100
TFSS	STAT5A	5.97	54.55	62.5	80
TFSS	SUPT20H	5.96	9.09	0	0
HISase	SUZ12	5.06	4.55	12.5	0
TFNS	TAF1	5.19	63.64	68.75	100
TFNS	TAF7	6.84	40.91	12.5	40
TFSS	TAL1	0.8	59.09	68.75	40
TFSS	TBL1XR1	5.75	59.09	56.25	100
TFNS	TBP	4.03	63.64	81.25	80
TFSS	TBX5	0.03	22.73	50	60
TFSS	TCF12	5.21	63.64	81.25	100
TFSS	TCF3	5.85	54.55	62.5	80
TFSS	TCF7L2	2.48	54.55	56.25	40
TFSS	TEAD4	1.19	77.27	62.5	80
TFSS	TFAP2A	0.18	40.91	43.75	40
TFSS	TFAP2C	0.01	50	50	60
TFSS	TFCP2	4.8	4.55	0	0
TFSS	TFE3	4.31	45.45	62.5	100
TFSS	THAP1	3.39	18.18	6.25	20
TFSS	TP53	5.06	4.55	6.25	20
HISase	TRIM28	7.92	54.55	56.25	60
TFSS	UBTF	6.64	27.27	31.25	60
TFSS	USF1	5.94	77.27	81.25	80
TFSS	USF2	7.25	45.45	56.25	60
TFSS	VSX2	0.03	4.55	0	0
DNARep	WRNIP1	5.11	36.36	50	40
TFSS	WT1	0.04	40.91	50	40
TFSS	YY1	5.98	86.36	68.75	100
TFSS	ZBTB18	4.46	4.55	0	0
TFSS	ZBTB33	4.35	50	43.75	40
TFSS	ZBTB7A	4.74	36.36	31.25	60
TFSS	ZEB1	4.87	22.73	31.25	40
TFSS	ZIC3	0.01	13.64	25	0
TFSS	ZKSCAN1	4.56	13.64	18.75	40
TFSS	ZNF143	4.81	77.27	68.75	40
TFSS	ZNF217	5.67	18.18	31.25	0
TFSS	ZNF219	2.39	4.55	6.25	0
TFSS	ZNF263	5.19	40.91	56.25	60
TFSS	ZNF274	4.86	13.64	0	0
TFSS	ZNF354C	2.78	95.45	100	100
TFSS	ZNF384	5.74	31.82	37.5	20
TFSS	ZZZ3	5.36	4.55	12.5	0

## Sheet: MatrixTFsordered percentages
acronym	TF	PolyA_RNA-seq	ANG	CSF3	CSF2	CXCL1	IFNG	IGF1	IL10	IL13	IL15	IL1A	IL3	IL5	IL6	IL7	LEP	CCL2	CCL8	CCL7	CCL22	CXCL9	KITLG	TGFB1	%	Column1	EGF	CXCL5	CCL1	IL12A	IL12B	IL1B	IL2	IL4	CSF1	CCL15	OSM	PDGFB	CXCL12	CCL17	THPO	VEGFA	%2	Column2	IL8	CXCL2	CCL5	TNF	LTA
TFSS	NFIC	4.95	1	0	0	0	1	1	1	0	1	1	1	1	1	1	1	0	0	0	1	0	1	1	63.64		1	1	1	1	1	1	1	1	1	1	1	1	1	1	1	1	100		1	1	1	1	1
TFSS	ATF2	5.33	1	0	0	0	1	1	1	0	1	1	1	0	1	1	1	1	0	0	1	0	1	1	63.64		1	0	1	1	1	1	1	1	1	1	0	1	1	1	0	1	81.25		1	1	1	1	1
TFSS	TCF12	5.21	1	0	0	0	0	1	1	0	1	1	1	1	1	1	1	1	0	0	1	0	1	1	63.64		1	1	1	1	1	1	0	1	1	1	0	1	1	1	0	1	81.25		1	1	1	1	1
TFSS	SP1	5.38	1	0	1	0	0	1	1	0	1	1	1	1	1	1	1	1	0	0	1	0	1	1	68.18		0	0	1	1	1	1	1	1	1	1	0	1	1	1	1	1	81.25		1	1	1	1	1
TFSS	RELA	6.47	1	1	0	0	1	1	1	0	1	1	1	1	1	1	1	1	1	0	1	0	1	1	77.27		0	0	1	1	1	1	1	1	1	1	1	1	0	1	0	1	75		1	1	1	1	1
TFSS	REST	5.34	1	1	0	0	0	1	1	1	1	1	1	1	1	1	1	1	1	0	1	0	1	1	77.27		1	1	1	1	1	0	1	0	1	0	1	1	1	1	0	1	75		1	1	1	1	1
HISase	SIN3A	5.49	1	1	1	1	0	1	1	0	1	0	1	1	1	1	1	1	0	1	1	0	1	1	77.27		0	1	1	1	1	1	1	1	1	0	0	1	0	1	1	1	75		1	1	1	1	1
TFSS	STAT3	6.45	1	1	1	1	0	1	1	0	1	1	1	0	1	1	1	1	0	1	1	0	1	1	77.27		0	1	1	1	1	1	1	1	1	0	0	1	1	1	0	1	75		1	1	1	1	1
TFSS	MYC	6.55	1	1	1	1	0	1	1	0	1	1	1	1	1	1	1	1	0	0	1	0	1	1	77.27		1	0	1	1	1	1	1	1	1	0	1	1	1	0	1	1	81.25		1	1	1	1	1
TFSS	SPI1	5.15	1	1	0	0	1	1	1	1	1	1	1	1	1	1	1	1	1	0	1	0	1	1	81.82		0	1	1	1	1	1	1	1	1	1	0	1	1	1	0	1	81.25		1	1	1	1	1
DNARep	RAD21	6.99	1	1	1	1	1	1	1	1	1	1	1	0	1	1	1	1	1	0	1	0	1	1	86.36		1	1	1	1	1	1	1	1	1	1	0	1	1	0	0	1	81.25		1	1	1	1	1
TFSS	YY1	5.98	1	1	1	1	0	1	1	1	1	1	1	1	1	1	1	1	1	0	1	0	1	1	86.36		0	0	1	1	1	1	1	1	1	1	0	1	1	0	0	1	68.75		1	1	1	1	1
TFSS	CEBPB	4.63	1	1	1	0	1	1	1	1	1	1	1	1	1	1	1	1	1	1	1	0	1	1	90.91		1	1	1	1	1	1	1	1	1	0	1	1	1	1	0	1	87.5		1	1	1	1	1
HISase	EP300	6.09	1	1	1	1	1	1	1	1	1	1	1	1	1	1	1	1	1	1	1	0	1	1	95.45		1	1	1	1	1	1	1	1	1	1	0	1	1	1	0	1	87.5		1	1	1	1	1
TFSS	ZNF354C	2.78	1	1	1	1	1	1	1	1	1	1	1	1	1	1	1	1	1	1	1	1	0	1	95.45		1	1	1	1	1	1	1	1	1	1	1	1	1	1	1	1	100		1	1	1	1	1
Pol2	POLR2A	6.33	1	1	1	1	0	1	1	1	1	1	1	1	1	1	1	1	1	1	1	0	1	1	90.91		1	1	1	1	1	1	1	1	1	1	1	1	1	1	1	1	100		1	1	1	1	1
TFSS	MAX	6.58	1	1	1	1	0	1	1	1	1	1	1	1	1	1	1	1	0	0	1	0	1	1	81.82		1	1	1	1	1	1	1	1	1	1	1	1	1	1	1	1	100		1	1	1	1	1
TFSS	CTCF	5.38	1	1	1	1	1	1	1	1	1	1	1	0	1	1	1	1	1	0	1	0	1	1	86.36		1	1	1	1	1	1	1	1	1	1	1	1	1	0	1	1	93.75		1	1	1	1	1
TFSS	PML	5.04	1	0	0	0	0	1	1	1	1	1	1	1	1	0	1	0	0	0	1	0	1	1	59.09		0	0	0	0	1	1	1	1	1	0	0	1	0	1	0	1	50		1	1	1	1	1
TFSS	TBL1XR1	5.75	1	0	0	0	0	1	1	1	1	1	1	0	1	0	1	1	0	0	1	0	1	1	59.09		0	0	1	1	1	0	1	1	1	0	0	1	1	0	0	1	56.25		1	1	1	1	1
TFSS	ELF1	6.62	1	1	1	1	1	1	1	0	1	1	1	1	1	0	1	1	0	0	1	0	1	1	77.27		0	0	1	1	1	1	0	1	1	0	0	1	1	1	1	1	68.75		1	1	1	1	1
TFSS	POU2F2	4.84	1	1	1	0	1	1	1	0	1	1	1	1	1	1	1	1	0	0	1	0	1	1	77.27		0	0	1	1	1	1	0	1	1	1	0	1	0	1	0	1	62.5		1	1	1	1	1
TFSS	PAX5	1.24	1	0	0	0	1	1	1	0	1	1	1	1	1	1	1	1	0	0	1	0	1	1	68.18		0	0	1	1	1	1	0	1	1	1	0	1	0	1	0	1	62.5		1	1	1	1	1
TFSS	BHLHE40	6.21	1	1	0	0	0	1	1	1	1	1	1	1	1	1	1	0	0	0	1	0	1	1	68.18		0	0	0	1	1	1	0	1	1	1	0	1	1	0	1	1	62.5		1	1	1	1	1
TFNS	TAF1	5.19	1	0	0	0	0	1	1	1	1	1	0	1	1	1	1	1	0	0	1	0	1	1	63.64		0	1	0	1	1	1	0	1	1	1	0	1	1	0	1	1	68.75		1	1	1	1	1
TFSS	BCL3	4.34	0	0	0	0	0	1	1	1	1	1	1	1	1	0	1	1	0	0	1	0	1	1	59.09		1	1	0	1	1	1	0	1	1	1	0	1	0	1	0	1	68.75		1	1	1	1	1
ChromRem	CHD2	7.5	1	0	0	0	0	1	1	0	1	1	0	1	1	1	1	0	0	0	1	0	1	1	54.55		0	0	1	1	1	1	0	1	1	0	0	1	1	1	1	1	68.75		1	1	1	1	1
TFSS	TFE3	4.31	1	0	1	1	0	0	1	1	1	0	0	0	0	0	0	0	1	1	0	0	1	1	45.45		1	1	1	0	0	0	1	1	1	1	0	0	1	1	1	0	62.5		1	1	1	1	1
TFSS	ATF1	5.15	0	0	1	0	1	1	0	1	0	1	1	1	1	1	1	1	0	0	0	0	1	1	59.09		0	0	1	0	1	0	1	1	1	0	0	1	1	0	0	1	50		1	1	1	0	1
TFSS	IKZF1	7.69	0	1	0	1	1	1	0	1	1	0	1	1	0	0	1	1	0	1	1	0	0	1	59.09		1	1	0	1	0	0	0	1	1	1	0	0	0	1	0	1	50		1	0	1	1	1
TFSS	CDX1	0.07	0	1	1	0	1	1	1	0	1	1	0	0	1	0	0	1	0	1	0	1	1	0	54.55		1	1	0	0	0	1	1	1	1	1	1	0	0	0	0	0	50		1	1	1	0	1
TFSS	ARID3A	2.65	1	1	0	0	0	1	0	1	0	1	0	0	1	1	1	0	1	0	1	0	1	1	54.55		0	0	1	0	1	0	1	0	1	1	0	1	1	0	0	1	50		1	1	1	0	1
TFSS	NFATC1	4.75	1	0	0	0	0	1	1	0	1	1	1	0	1	0	1	0	0	0	1	0	1	1	50		0	0	0	1	1	0	1	1	1	1	0	1	0	1	0	1	56.25		1	0	1	1	1
TFSS	STAT5A	5.97	0	0	0	0	0	1	1	1	1	1	1	0	1	1	1	0	0	0	1	0	1	1	54.55		0	0	0	1	1	1	1	1	1	1	0	1	0	1	0	1	62.5		1	0	1	1	1
TFSS	TCF3	5.85	1	0	0	0	0	1	1	0	1	1	1	1	1	0	1	0	0	0	1	0	1	1	54.55		1	0	1	0	1	1	0	1	1	1	0	1	0	1	0	1	62.5		1	0	1	1	1
TFSS	LEF1	8.47	0	1	0	0	1	0	1	0	1	0	1	1	1	1	1	0	1	1	0	1	1	0	59.09		1	0	1	0	0	1	1	1	1	1	1	0	0	1	0	1	62.5		1	1	1	0	1
TFSS	TEAD4	1.19	1	1	1	1	0	1	1	1	1	1	1	0	1	1	1	1	0	0	1	0	1	1	77.27		0	1	1	0	1	1	1	1	1	0	0	1	1	0	0	1	62.5		1	1	1	0	1
TFSS	FOXM1	2.27	1	0	0	0	1	1	1	0	1	1	1	1	1	0	1	1	0	0	1	0	1	1	63.64		1	0	1	1	1	1	1	1	1	1	0	1	0	1	0	1	75		1	0	1	1	1
DNARep	SMC3	4.92	1	1	1	1	0	1	1	0	1	1	0	0	1	1	1	1	0	0	1	0	1	1	68.18		0	0	1	1	1	1	1	1	1	1	0	1	1	1	0	1	75		1	1	0	1	1
TFSS	PAX4	0.01	1	1	1	1	1	1	1	1	1	1	1	1	0	0	1	0	0	0	1	0	1	0	68.18		0	1	0	1	1	0	1	0	1	1	1	1	1	1	1	1	75		1	1	0	1	1
TFSS	EGR1	9.99	1	0	1	1	0	1	1	1	0	1	1	1	1	0	1	1	0	0	1	0	1	1	68.18		0	0	1	1	1	1	1	1	1	1	1	1	1	0	1	1	81.25		0	1	1	1	1
TFNS	TBP	4.03	1	0	1	1	0	1	0	0	1	1	0	1	1	1	1	1	0	0	1	0	1	1	63.64		0	1	1	1	1	1	0	1	1	1	0	1	1	1	1	1	81.25		1	1	1	1	0
TFSS	BATF	5.53	1	0	0	0	0	1	1	0	1	1	1	1	1	1	1	1	1	0	1	0	1	0	63.64		1	0	1	1	1	1	1	1	1	1	0	1	1	1	0	1	81.25		1	0	1	1	1
TFSS	MEF2A	4.57	0	0	0	0	0	1	1	1	1	1	1	0	1	1	1	0	0	0	1	0	1	0	50		1	0	1	1	1	1	1	1	1	1	0	1	1	1	0	1	81.25		1	0	1	1	1
HISase	MTA3	3.89	0	0	0	0	0	1	1	0	1	1	1	0	1	1	1	0	0	0	1	0	1	0	45.45		0	0	1	1	1	1	1	1	1	1	1	1	0	1	0	1	75		1	0	1	1	1
TFSS	MYB	2.27	1	1	1	1	1	1	1	1	1	1	1	1	1	1	1	1	1	1	1	1	1	1	100		1	1	1	1	1	1	1	1	0	1	1	1	1	1	1	0	87.5		1	1	1	1	0
TFSS	RUNX3	7.95	1	1	1	0	1	1	1	1	1	1	1	1	1	1	1	1	1	0	1	0	1	1	86.36		1	0	1	1	1	1	1	1	1	1	1	1	1	1	0	1	87.5		1	0	1	1	1
TFSS	MAZ	7.41	1	1	1	1	0	1	1	1	1	1	1	1	1	1	1	1	0	0	1	0	1	1	81.82		0	0	1	1	1	1	1	1	1	1	0	1	1	1	1	1	81.25		0	1	1	1	1
TFSS	USF1	5.94	1	1	0	0	1	1	1	1	1	1	1	1	1	1	1	1	0	0	1	0	1	1	77.27		0	0	1	1	1	1	1	1	1	0	1	1	1	1	1	1	81.25		1	1	1	0	1
TFSS	GATA2	0.72	1	1	1	0	0	1	0	1	1	1	1	1	1	1	1	1	0	1	1	0	1	1	77.27		0	1	1	1	1	1	1	1	1	0	1	1	1	0	1	1	81.25		1	1	1	0	1
TFSS	EBF1	0.5	1	0	0	0	1	1	1	1	1	1	1	1	1	1	1	1	1	0	1	0	1	1	77.27		1	0	1	1	1	1	1	1	1	0	1	1	1	1	0	1	81.25		0	1	1	1	1
TFSS	JUND	9.48	1	1	1	0	1	1	0	1	1	1	1	1	1	1	1	1	1	0	1	1	1	1	86.36		1	1	1	1	1	1	1	1	1	1	1	1	1	0	1	1	93.75		1	1	0	0	1
TFSS	MAFF	4.49	1	1	1	1	0	1	1	0	1	1	1	1	1	1	1	1	1	0	1	0	1	1	81.82		1	1	1	1	1	1	1	1	1	0	1	1	1	1	0	1	87.5		1	1	0	0	1
TFSS	BRCA1	1.81	1	0	0	1	1	1	1	1	0	1	1	1	1	1	0	1	1	1	1	1	1	1	81.82		0	1	1	0	1	1	1	1	1	1	1	1	1	1	1	1	87.5		0	1	1	1	0
TFSS	MAFK	4.25	1	1	1	1	0	1	1	0	1	1	1	1	1	1	1	1	1	1	1	0	1	1	86.36		1	1	1	1	1	1	1	0	1	0	1	1	1	1	0	1	81.25		1	1	0	0	1
TFSS	FOXA1	0.12	1	1	1	0	1	1	1	1	1	1	0	0	1	1	1	1	0	0	1	0	1	1	72.73		0	1	1	1	1	1	1	1	1	1	0	1	1	1	0	1	81.25		1	1	0	0	1
HISase	RCOR1	3.6	1	1	1	0	0	1	0	1	1	1	1	1	1	1	1	1	0	0	1	0	1	1	72.73		1	0	1	1	1	1	1	1	1	0	0	1	1	1	0	1	75		1	1	0	0	1
TFSS	GATA3	5.81	1	1	0	0	1	1	1	1	1	1	1	0	1	1	1	1	0	0	1	1	1	0	72.73		0	0	1	1	1	1	1	0	1	0	0	1	1	1	1	1	68.75		1	1	1	0	0
TFSS	JUN	11.1	1	1	1	0	0	1	0	0	1	1	1	0	1	1	1	1	1	1	1	1	1	1	77.27		1	0	1	1	1	1	1	0	1	0	0	1	1	1	0	1	68.75		1	1	0	0	1
TFSS	NFE2L1	5.43	1	1	1	1	1	1	1	0	1	1	1	0	1	1	1	1	1	1	1	1	0	0	81.82		1	1	1	1	1	1	1	1	1	0	1	0	0	0	1	0	68.75		1	1	1	0	0
TFSS	FOS	12.3	1	1	1	1	1	1	0	0	1	1	0	1	1	1	1	1	1	1	1	0	1	1	81.82		0	1	1	1	1	1	1	0	1	0	1	1	1	1	0	1	75		1	1	0	0	1
acronym	TF	PolyA_RNA-seq	ANG	CSF3	CSF2	CXCL1	IFNG	IGF1	IL10	IL13	IL15	IL1A	IL3	IL5	IL6	IL7	LEP	CCL2	CCL8	CCL7	CCL22	CXCL9	KITLG	TGFB1	%	Column1	EGF	CXCL5	CCL1	IL12A	IL12B	IL1B	IL2	IL4	CSF1	CCL15	OSM	PDGFB	CXCL12	CCL17	THPO	VEGFA	%2	Column2	IL8	CXCL2	CCL5	TNF	LTA
TFSS	MXI1	4.89	1	1	1	0	1	1	1	0	1	1	1	1	1	1	1	1	0	0	1	0	1	1	77.27		0	0	0	1	1	1	0	1	1	1	0	1	0	0	1	1	56.25		0	1	1	1	0
TFSS	GABPA	4.54	1	1	0	0	0	1	0	1	1	1	0	1	1	1	1	1	0	0	1	0	1	1	63.64		0	1	0	1	1	1	0	1	1	0	0	1	0	0	1	1	56.25		1	1	0	0	1
TFSS	NR3C1	5.66	1	1	0	0	1	1	0	0	1	1	0	1	1	1	1	1	0	0	1	0	1	1	63.64		0	1	0	1	1	1	1	0	1	0	0	1	1	0	0	1	56.25		1	1	0	0	1
HISase	HDAC2	5.67	1	1	1	0	0	1	0	1	0	1	1	1	1	1	1	0	0	0	1	0	1	1	63.64		0	1	0	1	1	0	0	0	1	0	0	1	1	0	1	1	50		1	1	0	0	1
TFSS	FOSL2	5.55	1	1	0	1	1	1	0	0	1	1	0	0	1	1	1	1	0	0	1	0	1	1	63.64		0	1	0	1	1	1	0	0	1	0	0	1	1	0	0	1	50		1	1	0	0	1
TFSS	ATF3	4.57	1	1	0	0	1	1	0	1	1	1	0	1	1	0	1	1	0	0	1	0	1	1	63.64		0	1	1	0	1	0	0	1	1	0	0	1	1	0	0	1	50		1	1	0	0	1
TFSS	JUNB	10.7	0	0	0	0	1	1	0	1	1	1	0	0	1	0	1	1	0	0	0	0	1	1	45.45		0	0	1	1	1	1	0	0	1	0	0	1	0	0	0	1	43.75		1	1	0	0	1
TFSS	IRF1	7.1	1	1	0	0	0	1	0	1	1	0	0	1	1	0	1	0	0	0	1	0	1	1	50		0	0	1	1	1	0	1	0	1	0	0	1	0	0	0	1	43.75		1	1	0	0	1
TFSS	TFAP2C	0.01	1	1	0	0	0	0	0	0	1	1	0	0	1	1	1	1	0	0	1	0	1	1	50		0	0	0	1	1	1	0	0	1	0	0	1	0	1	1	1	50		1	1	1	0	0
TFSS	E2F6	2.81	1	0	1	1	0	0	0	0	0	1	0	1	1	0	1	1	0	0	1	0	1	1	50		0	0	0	1	1	0	0	1	1	1	0	1	1	0	0	1	50		1	1	1	0	0
TFSS	GFI1	4.73	0	0	1	0	1	1	1	0	1	1	0	1	0	1	0	0	1	0	1	1	1	0	54.55		1	1	0	1	0	1	1	1	1	1	0	0	1	1	0	0	62.5		1	0	0	1	1
HISase	TRIM28	7.92	1	0	0	0	0	1	0	1	1	1	0	0	1	1	1	1	0	0	1	0	1	1	54.55		1	0	0	1	1	1	1	0	1	0	0	1	1	0	0	1	56.25		1	1	1	0	0
TFSS	NOBOX	0.06	1	0	0	0	1	0	1	1	1	1	1	0	1	0	0	0	1	0	0	1	1	0	50		1	1	0	1	0	0	1	1	1	1	0	0	1	1	0	0	56.25		1	1	1	0	0
TFSS	GATA1	0.26	0	1	0	0	0	0	0	1	1	0	0	1	1	1	1	0	0	0	0	0	1	1	40.91		0	0	1	0	1	1	0	1	1	1	1	0	1	1	0	1	62.5		1	1	0	0	1
TFSS	MEF2C	3.69	1	0	0	0	0	1	0	0	0	1	1	0	1	0	1	0	0	0	1	0	1	1	40.91		1	0	0	1	1	0	1	1	1	1	0	1	1	0	0	1	62.5		1	0	1	0	1
TFSS	NKX2-1	0.03	1	0	1	0	1	0	0	0	0	1	1	0	0	1	0	1	0	1	1	0	0	0	40.91		1	1	1	0	1	0	1	1	1	1	1	0	0	1	0	0	62.5		1	0	0	1	1
TFSS	ZNF263	5.19	1	0	1	0	0	0	0	0	0	1	1	0	1	0	1	1	0	0	0	0	1	1	40.91		0	0	1	1	1	1	1	0	1	0	0	1	1	0	0	1	56.25		0	1	1	0	1
TFSS	USF2	7.25	1	1	0	0	0	1	1	0	0	1	0	1	1	0	1	0	0	0	1	0	1	0	45.45		0	0	1	0	1	0	1	1	1	0	0	1	1	1	0	1	56.25		0	1	1	0	1
TFSS	BCL11A	1.76	1	0	0	0	0	1	1	0	1	1	1	0	1	1	1	0	0	0	1	0	1	0	50		0	0	1	1	1	1	1	1	1	1	0	1	1	1	0	1	75		1	0	1	0	1
TFSS	ARNT	4.54	0	1	1	0	0	0	0	1	1	0	1	1	0	1	1	0	0	0	1	0	0	1	45.45		0	1	1	1	1	0	0	1	0	0	0	1	1	1	1	1	62.5		0	1	0	0	1
HISase	CBX3	6.92	1	0	1	0	0	1	0	1	1	1	0	1	1	0	1	0	0	0	1	0	0	0	45.45		0	1	0	0	1	1	1	1	1	0	0	1	1	0	0	1	56.25		1	1	0	0	0
TFSS	TCF7L2	2.48	1	0	0	0	0	1	0	0	1	1	0	1	1	1	1	1	0	0	1	0	1	1	54.55		0	1	0	1	1	1	1	0	1	0	0	1	1	0	0	1	56.25		1	1	0	0	0
TFSS	NFYB	4.63	1	1	0	0	1	1	0	0	1	0	0	1	1	1	1	0	0	0	1	0	1	1	54.55		0	0	1	0	1	0	1	0	1	0	1	1	1	0	1	1	56.25		0	0	1	1	0
TFSS	FOXA2	0.04	1	1	1	0	0	1	0	1	1	1	0	0	1	1	1	0	0	0	1	0	1	0	54.55		0	1	1	1	1	1	0	1	1	1	0	1	1	0	0	1	68.75		1	1	0	0	0
TFSS	TAL1	0.8	1	1	1	0	0	1	0	1	1	1	0	0	1	0	1	1	0	0	1	0	1	1	59.09		1	0	1	0	1	1	1	1	1	0	1	1	1	0	0	1	68.75		1	0	1	0	0
TFSS	IRF4	3.06	1	1	0	0	0	1	1	0	1	1	1	0	1	1	1	1	0	0	1	0	1	0	59.09		1	0	1	1	1	1	1	1	1	1	0	1	0	1	0	1	75		1	0	0	0	1
TFSS	ZNF143	4.81	1	1	1	1	0	1	1	0	1	0	1	1	1	1	1	1	1	0	1	0	1	1	77.27		0	1	1	1	1	1	1	0	1	0	1	1	1	0	0	1	68.75		1	1	0	0	0
TFSS	FOSL1	0.86	1	1	0	0	0	0	0	1	1	1	0	0	1	0	1	0	0	0	0	0	0	0	31.82		0	0	0	0	1	1	0	0	1	0	0	1	0	0	0	1	31.25		1	1	1	0	1
TFSS	BACH1	4.18	1	0	0	0	0	1	0	0	0	1	0	1	1	0	1	1	0	0	1	0	0	1	40.91		0	0	1	1	1	0	0	0	1	0	0	0	1	0	0	1	37.5		1	1	0	0	1
TFSS	ZBTB7A	4.74	1	1	1	1	0	0	1	0	0	0	0	0	0	0	1	0	0	0	1	0	0	1	36.36		0	0	0	1	0	0	0	1	1	0	0	1	0	0	0	1	31.25		0	1	1	0	1
TFSS	ETS1	9.68	1	0	0	0	0	0	0	1	1	0	0	1	1	0	1	0	0	0	1	0	1	1	40.91		0	0	0	0	0	0	0	1	1	0	0	1	0	0	0	1	25		0	1	0	1	1
ChromRem	CHD1	5.71	1	0	0	0	0	1	0	0	0	1	0	0	0	1	0	0	0	0	1	0	0	1	27.27		0	0	0	0	1	0	0	1	1	0	0	0	0	0	0	1	25		0	1	0	1	1
TFSS	UBTF	6.64	1	0	0	1	0	0	0	0	0	0	0	0	1	0	1	0	0	0	1	0	0	1	27.27		0	0	0	0	1	0	0	0	1	0	0	1	1	0	0	1	31.25		1	1	0	0	1
TFSS	RXRA	3.7	1	0	0	0	0	0	0	0	0	1	0	0	0	0	1	0	0	0	1	0	1	1	27.27		0	0	0	0	1	0	0	0	1	1	0	1	1	0	1	1	43.75		1	0	1	0	1
TFSS	TBX5	0.03	0	0	0	0	1	1	0	0	1	1	0	0	0	0	0	0	0	0	0	1	0	0	22.73		1	1	0	1	0	0	1	1	0	1	1	0	1	0	0	0	50		1	1	0	0	1
TFSS	NFIA	1.98	0	0	0	0	1	0	0	0	0	1	0	0	0	0	1	1	1	0	1	1	0	0	31.82		1	1	0	0	1	0	0	0	1	1	1	0	1	0	0	1	50		1	1	1	0	0
HISase	SETDB1	5.17	0	0	0	0	0	0	0	1	1	0	0	1	1	1	1	0	0	0	1	0	1	0	36.36		0	0	0	1	1	1	1	0	1	0	0	1	1	0	0	1	50		1	1	1	0	0
TFSS	ESR1	2.23	0	0	0	0	1	1	1	0	1	0	0	0	1	0	1	0	0	0	0	0	1	1	36.36		0	0	1	1	1	0	1	0	1	0	0	1	1	0	0	1	50		1	1	1	0	0
TFSS	HNF4A	0.08	1	0	0	0	0	0	0	0	0	1	0	0	0	1	1	0	0	0	1	0	1	0	27.27		0	0	0	1	0	0	1	1	1	1	0	1	1	0	1	1	56.25		0	1	1	0	0
TFSS	HNF4G	0.03	1	0	1	0	0	0	0	0	0	1	0	0	0	1	1	0	0	0	1	0	1	0	31.82		0	0	0	1	1	0	1	0	1	1	0	1	0	0	0	1	43.75		0	1	1	0	0
DNARep	WRNIP1	5.11	1	0	0	0	0	0	1	0	1	0	0	0	0	1	1	0	0	0	1	0	1	1	36.36		0	0	1	0	1	1	0	1	1	0	0	1	1	0	0	1	50		0	0	1	0	1
TFSS	WT1	0.04	0	0	1	1	0	0	0	1	0	0	1	0	0	0	1	1	1	0	1	0	0	1	40.91		0	1	0	1	1	0	0	0	0	0	1	1	1	1	1	0	50		1	1	0	0	0
TFSS	TFAP2A	0.18	1	1	0	0	0	0	0	0	1	1	0	0	1	1	1	0	0	0	1	0	1	0	40.91		0	0	0	1	1	1	0	0	1	0	0	1	0	1	0	1	43.75		1	1	0	0	0
TFSS	NR2F2	0.8	0	1	0	0	0	1	0	1	1	1	0	0	1	0	1	0	0	0	1	0	1	1	45.45		0	0	1	0	1	0	0	1	1	0	0	1	1	0	0	1	43.75		1	0	0	0	1
TFSS	FOXP2	0.19	0	1	0	0	0	0	0	0	1	1	0	1	0	1	1	1	0	0	1	0	1	1	45.45		0	0	0	1	1	0	0	0	1	0	1	1	1	0	0	1	43.75		1	1	0	0	0
TFSS	SRF	4.49	1	1	0	0	0	1	1	0	0	0	1	1	0	1	0	1	0	0	1	0	1	1	50		0	0	0	1	1	0	1	0	1	0	0	1	1	0	0	1	43.75		0	1	0	0	1
TFSS	ZBTB33	4.35	1	0	0	0	0	1	0	0	0	1	1	1	1	0	1	1	0	0	1	0	1	1	50		0	1	1	1	1	0	0	0	1	0	0	1	0	0	0	1	43.75		0	1	0	0	1
TFSS	LMO2	3.24	0	0	0	1	1	0	0	1	1	0	1	1	1	1	0	0	0	1	1	0	1	1	54.55		0	0	0	1	0	1	0	1	1	0	0	1	0	1	1	0	43.75		0	1	0	0	1
TFSS	STAT1	7.43	1	0	0	0	0	1	0	0	1	1	0	1	1	1	0	1	0	0	1	1	1	1	54.55		0	0	0	0	1	1	0	1	1	0	0	1	0	0	1	1	43.75		1	1	0	0	0
TFSS	RFX5	5.78	1	1	0	0	0	1	0	0	1	1	0	1	1	1	1	1	0	0	1	0	1	1	59.09		0	0	0	1	1	0	0	0	1	1	0	1	0	0	1	1	43.75		1	1	0	0	0
TFSS	BCL6	4.32	0	1	0	0	1	1	0	0	0	1	0	0	1	0	0	1	0	0	1	0	0	1	36.36		0	1	1	0	0	0	0	0	0	0	0	0	0	0	0	0	12.5		1	0	0	0	1
HISase	HDAC1	7.21	0	0	1	0	0	1	0	0	0	0	1	1	1	0	1	0	0	0	1	0	0	1	36.36		0	0	0	0	0	0	0	0	1	0	0	0	0	0	0	1	12.5		0	1	0	0	1
TFNS	TAF7	6.84	1	0	0	1	0	1	0	0	1	0	0	1	1	1	0	0	0	0	1	0	1	0	40.91		0	0	0	0	0	0	0	1	0	0	0	0	0	0	0	1	12.5		1	1	0	0	0
TFSS	BCLAF1	7.09	1	0	0	0	0	1	0	0	1	1	1	0	0	0	1	1	0	0	1	0	0	1	40.91		0	0	0	1	0	1	0	1	0	0	0	1	0	0	0	1	31.25		0	1	0	0	1
Cyclin	CCNT2	5.31	0	0	1	0	0	0	0	1	0	0	1	1	1	0	1	0	0	0	1	0	1	1	40.91		0	0	0	0	1	0	1	0	1	0	0	1	0	0	0	1	31.25		1	1	0	0	0
TFSS	MEIS1	0.85	0	1	1	0	0	1	0	0	0	0	1	0	0	0	0	0	1	0	0	0	0	1	27.27		1	1	0	0	0	1	0	1	1	0	1	0	0	0	0	0	37.5		1	0	1	0	0
TFSS	ZEB1	4.87	1	0	0	0	0	0	1	0	1	0	0	0	0	0	0	0	0	0	1	0	1	0	22.73		0	0	0	1	1	1	0	0	0	0	0	1	0	0	0	1	31.25		0	0	1	0	1
TFSS	E2F1	1.53	1	0	0	0	0	0	0	0	0	0	0	1	0	1	1	0	0	0	0	0	1	1	27.27		0	0	0	0	1	1	0	0	1	0	0	1	0	0	0	1	31.25		1	1	0	0	0
TFSS	CTCFL	0.01	0	1	0	1	0	0	1	0	0	0	0	0	1	0	1	0	0	0	0	0	0	1	27.27		0	0	1	1	0	0	0	0	1	0	0	0	1	0	0	1	31.25		1	0	1	0	0
TFNS	HMGN3	6.07	1	0	0	0	0	0	0	1	0	0	1	1	1	0	1	0	0	0	0	0	0	1	31.82		0	0	0	0	1	0	0	0	1	0	0	1	1	0	0	1	31.25		1	1	0	0	0
TFSS	PRDM1	6.13	0	0	0	0	0	1	0	0	0	0	0	0	1	1	0	0	0	0	1	0	1	0	22.73		0	0	0	1	1	0	0	0	1	0	0	1	0	0	0	0	25		1	1	0	0	0
HISase	KDM5B	3.84	1	0	0	0	0	0	0	0	0	0	0	1	1	0	0	0	0	0	1	0	0	1	22.73		0	0	0	0	0	0	0	1	1	0	0	1	0	0	0	1	25		1	1	0	0	0
TFSS	CEBPD	4.1	1	0	0	0	0	0	0	0	0	1	0	0	0	1	0	0	0	0	1	0	0	1	22.73		0	0	0	0	0	0	0	0	1	0	0	0	1	0	1	1	25		1	1	0	0	0
TFSS	ZKSCAN1	4.56	0	0	0	0	0	0	0	0	0	0	0	0	1	1	0	0	0	0	1	0	0	0	13.64		0	0	1	0	0	0	0	0	1	0	0	1	0	0	0	0	18.75		1	1	0	0	0
TFSS	BACH2	4.02	0	1	0	0	0	0	0	0	0	0	0	0	0	0	0	0	0	0	0	0	1	0	9.09		0	0	0	0	0	0	0	0	1	1	0	0	0	0	0	0	12.5		1	0	0	0	1
ChromRem	HLTF	3.67	1	1	1	0	1	1	0	0	0	1	1	0	1	0	0	1	0	0	0	1	1	0	50		1	0	0	1	1	0	1	1	1	1	0	0	1	0	0	0	50		1	0	0	0	0
HISase	RBBP5	3.88	1	0	0	0	0	1	0	1	0	0	0	1	1	1	1	1	0	0	1	0	1	1	50		0	1	0	0	1	0	0	1	1	0	0	1	1	0	0	1	43.75		0	1	0	0	0
TFNS	GTF2F1	5.98	1	1	0	0	0	0	0	0	1	1	0	1	1	0	1	1	0	0	1	0	1	1	50		0	1	0	0	1	1	0	1	1	0	0	1	0	0	0	1	43.75		0	1	0	0	0
TFSS	CREB1	5.68	1	1	0	0	0	1	0	0	1	1	0	1	1	1	0	1	0	0	1	0	0	1	50		0	0	0	1	1	0	0	0	1	0	0	1	1	0	0	1	37.5		0	1	0	0	0
TFSS	E2F4	5.89	1	0	0	0	0	1	0	0	1	1	0	1	1	0	1	0	0	0	1	0	1	1	45.45		0	1	0	0	1	0	0	0	1	0	0	1	1	0	0	1	37.5		0	1	0	0	0
TFSS	RUNX2	4.24	1	0	1	1	1	0	1	0	0	0	1	0	0	1	1	1	1	0	0	1	1	0	54.55		0	0	1	0	0	0	1	0	0	1	1	0	0	0	0	1	31.25		0	0	0	1	0
TFSS	NR5A2	0.08	1	1	0	0	1	0	1	0	0	0	0	0	1	0	1	1	0	1	1	1	1	0	50		1	0	0	1	0	0	1	0	0	0	0	0	0	0	0	0	18.75		1	0	0	0	0
TFNS	CBFB	6.05	1	0	1	1	0	0	1	0	0	0	1	0	0	0	0	1	1	1	1	1	0	0	45.45		0	0	1	0	0	0	0	0	0	1	0	0	0	0	0	0	12.5		0	0	0	1	0
acronym	TF	PolyA_RNA-seq	ANG	CSF3	CSF2	CXCL1	IFNG	IGF1	IL10	IL13	IL15	IL1A	IL3	IL5	IL6	IL7	LEP	CCL2	CCL8	CCL7	CCL22	CXCL9	KITLG	TGFB1	%	Column1	EGF	CXCL5	CCL1	IL12A	IL12B	IL1B	IL2	IL4	CSF1	CCL15	OSM	PDGFB	CXCL12	CCL17	THPO	VEGFA	%2	Column2	IL8	CXCL2	CCL5	TNF	LTA
TFSS	AHR	5.09	0	0	1	0	0	0	1	1	0	0	0	1	0	1	1	0	0	0	1	0	0	1	36.36		0	0	0	1	0	0	0	1	0	0	0	1	0	0	0	1	25		0	0	1	0	0
TFSS	MYBL2	1.93	1	0	0	0	0	0	0	0	0	1	0	0	1	0	1	0	0	0	1	0	1	1	31.82		0	0	0	0	1	0	0	0	1	0	0	1	0	0	0	1	25		0	1	0	0	0
ChromRem	SMARCC1	5.39	1	0	0	0	0	0	1	0	0	0	0	1	1	1	0	0	0	0	0	0	1	0	27.27		0	0	0	0	1	0	0	0	1	0	0	1	0	0	0	1	25		0	1	0	0	0
TFSS	RBPJ	5.24	0	0	1	1	0	0	0	0	1	0	0	1	0	1	0	0	0	0	0	0	1	0	27.27		0	0	1	0	1	1	0	0	0	0	0	0	0	1	1	0	31.25		0	0	1	0	0
HISase	PHF8	4.7	1	0	0	0	0	0	0	0	0	0	0	1	1	0	1	0	0	0	1	0	0	1	27.27		0	0	0	0	1	0	0	0	1	0	0	1	0	0	1	1	31.25		0	1	0	0	0
TFSS	NKX2-5	0.03	0	1	0	0	0	1	0	0	0	0	1	0	0	1	0	0	0	0	1	0	1	0	27.27		1	1	1	0	0	0	1	0	0	0	0	0	0	0	1	0	31.25		0	0	1	0	0
TFSS	ZNF384	5.74	0	0	0	0	0	1	1	1	0	0	0	0	0	1	0	1	0	0	0	1	1	0	31.82		1	0	1	0	0	0	1	1	0	0	1	0	0	0	1	0	37.5		0	0	1	0	0
TFSS	STAT2	6.48	0	0	0	0	0	0	0	0	0	0	0	0	1	0	0	0	0	0	0	0	0	1	9.09		0	0	0	0	0	0	0	1	1	0	0	1	0	0	1	0	25		0	0	1	0	0
ChromRem	SMARCB1	5.18	1	0	0	0	0	0	0	0	0	0	0	1	0	0	0	0	0	0	1	0	1	0	18.18		0	0	0	0	0	0	1	0	1	0	0	1	0	0	0	1	25		0	1	0	0	0
TFSS	ELK4	6.35	1	0	0	0	0	0	0	0	0	0	0	1	1	0	0	0	0	0	0	0	1	0	18.18		0	0	0	0	0	1	0	0	1	0	0	0	0	0	0	1	18.75		0	1	0	0	0
TFSS	NFE2	2.17	0	0	0	0	0	1	0	0	0	0	0	0	1	0	1	0	0	0	0	0	0	0	13.64		0	0	1	0	0	0	0	0	1	0	0	0	1	0	0	0	18.75		0	0	0	0	1
ChromRem	SMARCA4	5.71	0	0	0	0	0	0	0	0	0	0	0	0	1	0	0	0	0	0	0	0	1	1	13.64		0	0	0	0	0	0	1	0	0	0	0	0	0	0	0	1	12.5		0	1	0	0	0
RNAbinding	RPS8	11.7	0	0	0	0	0	0	1	1	1	0	0	0	0	0	0	0	0	0	0	1	0	0	18.18		0	0	0	0	0	0	1	1	0	0	0	0	0	0	0	0	12.5		0	0	1	0	0
TFSS	NANOG	0.14	0	0	0	0	0	1	0	0	0	0	0	0	1	1	0	0	0	0	0	0	1	0	18.18		0	0	0	0	1	0	0	0	0	0	0	0	1	0	0	0	12.5		1	0	0	0	0
TFNS	GTF2B	5.21	0	0	0	0	0	0	0	0	1	0	0	1	0	0	0	0	0	0	0	0	0	0	9.09		0	0	0	0	0	0	0	1	0	0	0	0	0	0	0	1	12.5		0	1	0	0	0
TFSS	SPZ1	0.01	0	0	0	0	0	0	0	0	0	0	0	0	0	0	0	0	0	1	0	0	1	0	9.09		0	0	0	0	0	1	0	0	0	0	0	1	0	1	0	0	18.75		0	0	1	0	0
TFSS	ELK1	4.68	1	0	0	0	0	0	1	0	1	0	0	1	0	0	1	0	0	0	1	0	0	0	27.27		0	0	0	0	0	0	0	0	1	0	0	0	0	0	0	1	12.5		0	1	0	0	0
TFSS	SREBF2	5.3	1	1	0	0	0	1	1	0	0	1	0	0	0	0	0	0	0	0	1	0	0	0	27.27		0	0	0	0	0	0	0	0	0	0	1	0	0	0	0	0	6.25		1	0	0	0	0
TFSS	THAP1	3.39	1	0	0	0	0	0	0	0	0	0	0	1	0	0	1	0	0	0	1	0	0	0	18.18		0	0	0	0	0	0	0	0	0	1	0	0	0	0	0	0	6.25		0	1	0	0	0
HISase	SAP30	3.15	0	0	0	0	0	0	0	0	0	0	0	1	0	0	0	0	0	0	0	0	0	1	9.09		0	0	0	0	0	0	0	0	0	0	0	0	0	0	0	1	6.25		0	1	0	0	0
TFSS	TP53	5.06	0	0	0	0	0	0	0	0	0	1	0	0	0	0	0	0	0	0	0	0	0	0	4.55		0	0	0	0	0	0	0	0	0	0	0	0	0	0	1	0	6.25		0	1	0	0	0
TFSS	LHX3	0.07	0	0	0	0	0	0	0	0	1	0	0	0	0	0	0	0	0	0	0	0	0	0	4.55		0	0	0	0	0	0	0	0	0	0	0	0	0	0	0	0	0		1	0	0	0	0
TFSS	PDX1	0.01	0	0	0	0	0	0	0	0	0	0	0	0	0	0	0	1	0	0	0	0	1	0	9.09		0	0	0	0	0	0	0	0	0	0	0	0	0	0	0	0	0		0	0	1	0	0
Pol3F	BDP1	5.05	1	0	0	0	0	0	0	0	0	0	0	0	0	0	0	0	0	0	1	0	0	0	9.09		0	0	0	0	0	0	0	0	0	0	0	0	0	0	0	0	0		0	0	0	0	0
Pol3F	BRF1	4.28	1	0	0	0	0	0	0	0	0	0	0	0	0	0	0	0	0	0	1	0	0	0	9.09		0	0	0	0	0	0	0	0	0	0	0	0	0	0	0	0	0		0	0	0	0	0
TFSS	SUPT20H	5.96	0	0	0	0	0	0	0	0	0	0	0	0	1	0	0	0	0	0	0	0	1	0	9.09		0	0	0	0	0	0	0	0	0	0	0	0	0	0	0	0	0		0	0	0	0	0
Pol3F	POLR3A	3.5	1	0	0	0	0	0	0	0	0	0	0	0	0	0	0	0	0	0	1	0	0	0	9.09		0	0	0	0	0	0	0	0	0	0	0	0	0	0	0	0	0		0	0	0	0	0
TFSS	RORA	6.42	0	0	1	0	0	0	1	0	0	0	0	0	0	0	0	0	0	0	0	0	0	0	9.09		0	0	0	0	0	0	0	0	0	0	0	0	0	0	0	0	0		0	0	0	0	0
TFSS	ZBTB18	4.46	0	0	0	0	0	0	0	0	0	0	0	0	0	0	0	0	0	0	0	0	1	0	4.55		0	0	0	0	0	0	0	0	0	0	0	0	0	0	0	0	0		0	0	0	0	0
TFSS	VSX2	0.03	0	0	0	0	0	0	0	0	0	0	0	0	0	0	0	0	1	0	0	0	0	0	4.55		0	0	0	0	0	0	0	0	0	0	0	0	0	0	0	0	0		0	0	0	0	0
TFSS	TFCP2	4.8	0	0	0	1	0	0	0	0	0	0	0	0	0	0	0	0	0	0	0	0	0	0	4.55		0	0	0	0	0	0	0	0	0	0	0	0	0	0	0	0	0		0	0	0	0	0
TFSS	SREBP1	5.58	0	0	0	0	0	0	0	0	0	0	0	0	0	0	0	0	0	0	0	0	0	1	4.55		0	0	0	0	0	0	0	0	0	0	0	0	0	0	0	0	0		0	0	0	0	0
TFSS	PPARGC1A	0.24	0	0	0	0	0	0	0	0	0	0	0	0	0	0	0	0	0	0	1	0	0	0	4.55		0	0	0	0	0	0	0	0	0	0	0	0	0	0	0	0	0		0	0	0	0	0
TFSS	IRF3	7.27	1	0	0	0	0	0	0	0	0	0	0	0	0	0	0	0	0	0	0	0	0	0	4.55		0	0	0	0	0	0	0	0	0	0	0	0	0	0	0	0	0		0	0	0	0	0
HISase	HDAC6	5.59	0	0	0	0	0	0	0	0	0	0	0	0	0	0	0	0	0	0	1	0	0	0	4.55		0	0	0	0	0	0	0	0	0	0	0	0	0	0	0	0	0		0	0	0	0	0
TFSS	ETV7	1.57	0	0	0	0	0	0	0	0	0	0	0	0	0	0	0	1	0	0	0	0	0	0	4.55		0	0	0	0	0	0	0	0	0	0	0	0	0	0	0	0	0		0	0	0	0	0
TFSS	ESRRA	4.29	0	0	0	0	0	0	0	0	0	0	0	0	0	0	1	0	0	0	0	0	0	0	4.55		0	0	0	0	0	0	0	0	0	0	0	0	0	0	0	0	0		0	0	0	0	0
ChromRem	BPTF	6.39	0	0	0	0	0	0	0	0	0	0	0	0	1	0	0	0	0	0	0	0	0	0	4.55		0	0	0	0	0	0	0	0	0	0	0	0	0	0	0	0	0		0	0	0	0	0
TFSS	DMRT3	0.01	0	0	0	0	0	0	0	0	0	0	0	0	0	0	0	0	0	0	0	0	0	0	0		0	0	0	0	0	0	1	0	0	0	0	0	0	0	0	0	6.25		0	0	0	0	0
HISase	KDM5A	6.02	0	0	0	0	0	0	0	0	0	0	0	0	0	0	0	0	0	0	0	0	0	0	0		0	0	0	0	0	0	0	0	0	0	0	0	0	0	0	1	6.25		0	0	0	0	0
TFSS	ZNF219	2.39	0	0	0	0	0	0	0	0	1	0	0	0	0	0	0	0	0	0	0	0	0	0	4.55		0	0	0	0	0	0	0	0	0	0	1	0	0	0	0	0	6.25		0	0	0	0	0
TFSS	ONECUT1	0.01	0	0	0	0	0	0	0	0	0	1	0	0	0	0	0	0	0	0	0	0	0	0	4.55		1	0	0	0	0	0	0	0	0	0	0	0	0	0	0	0	6.25		0	0	0	0	0
TFSS	NFIL3	4.38	0	0	0	0	0	0	0	1	1	0	0	0	0	0	0	0	0	0	0	0	0	0	9.09		0	0	1	0	0	0	0	0	0	0	0	0	0	0	0	0	6.25		0	0	0	0	0
TFSS	HSF1	5.7	1	0	0	0	0	0	0	0	0	0	0	0	0	0	0	0	0	0	1	0	0	0	9.09		0	0	0	0	0	0	0	0	0	0	0	0	0	0	0	1	6.25		0	0	0	0	0
TFSS	ALX1	0.03	0	0	0	0	0	0	0	1	1	0	0	0	0	0	0	0	0	0	0	0	0	0	9.09		0	1	0	0	0	0	0	0	0	0	0	0	0	0	0	0	6.25		0	0	0	0	0
TFSS	SP2	4.94	0	0	0	0	0	1	0	0	0	0	1	0	0	1	1	0	0	0	0	0	0	1	22.73		0	0	1	0	0	0	0	0	0	0	0	0	0	0	0	0	6.25		0	0	0	0	0
DNARep	MBD4	4.88	1	0	0	0	0	0	0	0	0	1	0	0	0	0	0	0	0	0	1	0	1	0	18.18		0	0	0	0	0	0	0	0	0	0	0	0	0	0	0	1	6.25		0	0	0	0	0
TFSS	SP4	5.07	0	0	0	0	0	0	0	0	0	0	0	1	0	0	0	0	0	0	1	0	0	1	13.64		0	0	0	0	0	0	0	0	0	0	0	1	0	0	0	0	6.25		0	0	0	0	0
TFSS	SMAD3	5.36	0	0	0	0	0	0	1	0	0	0	0	0	0	0	0	0	0	0	1	0	0	1	13.64		0	0	0	0	0	0	0	0	0	0	0	0	0	1	0	0	6.25		0	0	0	0	0
Pol3F	POLR3G	1.51	1	0	0	0	0	0	0	0	0	0	0	0	1	0	0	0	0	0	1	0	1	0	18.18		0	0	0	0	0	0	0	0	0	0	0	0	0	0	0	0	0		0	0	0	0	0
TFSS	ZNF274	4.86	0	0	0	0	0	0	0	1	0	0	0	0	0	0	0	0	0	0	1	0	1	0	13.64		0	0	0	0	0	0	0	0	0	0	0	0	0	0	0	0	0		0	0	0	0	0
TFSS	NKX2-2	0.03	0	0	0	0	1	1	0	0	0	0	0	0	0	0	0	0	0	0	0	1	0	0	13.64		0	0	0	0	0	0	0	0	0	0	0	0	0	0	0	0	0		0	0	0	0	0
TFSS	NR2C2	5.19	0	0	0	0	0	0	0	0	0	0	0	0	0	0	0	0	0	0	0	0	0	0	0		0	0	0	0	0	0	0	0	1	0	0	0	0	0	0	1	12.5		0	0	0	0	0
TFSS	ZZZ3	5.36	0	0	0	0	0	0	0	0	0	0	0	0	1	0	0	0	0	0	0	0	0	0	4.55		0	0	0	1	0	0	0	0	0	0	0	0	1	0	0	0	12.5		0	0	0	0	0
HISase	SUZ12	5.06	0	0	0	0	0	0	0	0	0	0	0	0	0	0	1	0	0	0	0	0	0	0	4.55		0	0	0	0	0	0	0	0	0	0	0	1	0	0	0	1	12.5		0	0	0	0	0
TFSS	SOX10	0.06	0	0	0	0	1	0	0	0	0	0	0	0	0	0	0	0	0	0	0	0	0	0	4.55		0	0	0	0	0	1	1	0	0	0	0	0	0	0	0	0	12.5		0	0	0	0	0
TFSS	NKX3-1	1.13	0	0	0	0	0	1	0	0	0	0	0	0	0	0	0	0	0	0	0	0	0	0	4.55		0	0	0	0	0	0	1	0	0	0	0	0	1	0	0	0	12.5		0	0	0	0	0
TFSS	HIF1A	5.99	0	0	0	0	0	0	0	1	0	0	0	0	0	0	0	0	0	0	0	0	0	0	4.55		0	0	0	0	1	0	0	0	0	0	0	0	0	0	0	1	12.5		0	0	0	0	0
HISase	HDAC8	3.41	0	0	0	0	0	0	0	0	0	0	0	0	1	0	0	0	0	0	0	0	0	0	4.55		0	0	0	0	0	0	0	1	1	0	0	0	0	0	0	1	18.75		0	0	0	0	0
TFSS	HOXA7	0.15	0	0	0	0	0	1	0	0	0	1	0	0	0	0	0	0	0	0	0	0	0	0	9.09		0	1	0	0	0	1	0	0	1	0	0	0	0	0	1	0	25		0	0	0	0	0
TFSS	ZIC3	0.01	0	0	0	0	0	0	0	1	0	0	0	0	0	0	1	0	0	0	0	0	0	1	13.64		0	0	0	0	0	1	0	0	0	1	0	0	1	1	0	0	25		0	0	0	0	0
TFSS	HIC1	1.8	0	0	1	0	0	0	0	0	0	0	0	1	0	0	0	0	0	0	0	0	0	1	13.64		0	0	0	1	0	1	0	0	0	0	1	0	0	0	0	0	18.75		0	0	0	0	0
ChromRem	SMARCC2	6.12	1	0	0	0	0	0	0	0	0	0	0	0	1	0	0	0	0	0	0	0	1	0	13.64		0	0	0	0	0	0	0	0	1	0	0	0	0	0	0	1	12.5		0	0	0	0	0
Pol3F	GTF3C2	5.47	1	0	0	0	0	0	0	0	0	0	0	0	0	0	0	0	0	0	1	0	1	1	18.18		0	0	0	0	0	0	0	0	1	0	0	0	0	0	0	1	12.5		0	0	0	0	0
TFSS	POU5F1	0.52	1	0	0	0	0	0	0	0	1	0	0	0	1	1	0	0	0	0	0	0	1	0	22.73		0	0	0	0	1	1	0	0	0	0	0	0	0	0	0	0	12.5		0	0	0	0	0
HISase	SIRT6	4.11	1	0	0	0	0	1	0	1	0	1	0	0	1	0	0	0	0	0	0	0	0	1	27.27		0	0	0	0	0	0	0	0	1	0	0	0	0	0	0	1	12.5		0	0	0	0	0
TFSS	NR5A1	0.11	0	1	0	0	1	0	0	0	0	0	0	0	0	0	1	0	0	1	0	1	1	0	27.27		0	0	0	0	0	0	0	0	0	0	0	1	0	0	1	0	12.5		0	0	0	0	0
TFSS	SIX5	1.19	1	0	0	0	0	1	0	0	0	0	0	1	1	0	0	0	0	0	1	0	0	1	27.27		0	0	0	0	1	0	0	0	1	0	0	0	0	0	0	1	18.75		0	0	0	0	0
TFNS	CTBP2	4.58	1	0	0	0	0	0	0	0	1	0	0	1	1	1	0	1	0	0	0	0	0	0	27.27		0	0	1	0	0	0	0	0	0	0	0	1	0	0	0	1	18.75		0	0	0	0	0
TFSS	NFYA	4.95	1	0	0	0	0	0	0	0	0	0	0	1	1	0	0	1	0	0	0	0	1	1	27.27		0	0	0	0	0	0	0	0	1	0	1	1	0	0	0	1	25		0	0	0	0	0
TFSS	NRF1	4.1	1	0	0	0	0	1	0	0	0	0	0	1	0	0	1	0	0	0	1	0	0	1	27.27		0	0	0	0	0	0	0	1	0	1	0	0	1	0	0	1	25		0	0	0	0	0
TFSS	SRY	0.11	0	0	0	0	1	1	0	0	0	0	0	0	0	0	0	0	0	1	0	1	1	0	22.73		1	0	0	0	0	1	1	0	0	0	0	0	0	1	0	0	25		0	0	0	0	0
TFSS	PBX3	3.65	1	0	0	0	0	1	1	0	1	0	0	0	1	0	0	0	0	0	1	0	0	1	31.82		0	0	0	1	1	0	0	1	0	0	0	1	0	0	0	1	31.25		0	0	0	0	0
HISase	EZH2	3.47	0	0	0	0	0	0	0	1	1	0	1	0	1	1	1	1	0	0	1	0	0	0	36.36		0	0	1	0	1	0	0	0	0	0	0	1	1	0	1	1	37.5		0	0	0	0	0
TFSS	CRX	0.04	0	0	1	0	1	0	0	1	0	0	0	1	1	0	0	0	0	0	0	0	0	0	22.73		0	0	1	0	0	0	0	1	0	1	0	0	1	1	1	0	37.5		0	0	0	0	0
TFSS	ZNF217	5.67	1	0	0	0	0	1	0	0	0	0	0	0	1	0	0	0	0	0	0	0	1	0	18.18		0	0	0	1	1	1	0	0	0	0	0	1	1	0	0	0	31.25		0	0	0	0	0
[truncated: 4 more columns]

## Sheet: dynamic_tables
			I		II		III
Count of TF			ChromRem	1	ChromRem	2	ChromRem	5
Row Labels	Total		CHD2		CHD1		BPTF
ChromRem	1		HISase	4	HLTF		SMARCA4
CHD2	1		EP300		HISase	7	SMARCB1
DNARep	2		MTA3		CBX3		SMARCC1
RAD21	1		RCOR1		HDAC1		SMARCC2
SMC3	1		SIN3A		HDAC2		HISase	8
HISase	4		DNARep	2	KDM5B		EZH2
EP300	1		RAD21		RBBP5		HDAC6
MTA3	1		SMC3		SETDB1		HDAC8
RCOR1	1		Pol2	1	TRIM28		KDM5A
SIN3A	1		POLR2A		DNARep	1	PHF8
Pol2	1		TFNS	2	WRNIP1		SAP30
POLR2A	1		TAF1		Cyclin	1	SIRT6
TFNS	2		TBP		CCNT2		SUZ12
TAF1	1		TFSS	51	TFNS	4	DNARep	1
TBP	1		Total	61	CBFB		MBD4
TFSS	51				GTF2F1		RNAbinding	1
JUN	1				HMGN3		RPS8
ARID3A	1				TAF7		Pol3F	5
ATF1	1				TFSS	58	BDP1
ATF2	1				Total	73	BRF1
BATF	1						GTF3C2
BCL3	1						POLR3A
BHLHE40	1						POLR3G
BRCA1	1						TFNS	2
CDX1	1						CTBP2
CEBPB	1						GTF2B
CTCF	1						TFSS	54
EBF1	1						Total	76
EGR1	1
ELF1	1
FOS	1
FOXA1	1
FOXM1	1
GATA2	1
GATA3	1
IKZF1	1
JUND	1
LEF1	1
MAFF	1
MAFK	1
MAX	1
MAZ	1
MEF2A	1
MYB	1
MYC	1
NFATC1	1
NFE2L1	1
NFIC	1
PAX4	1
PAX5	1
PML	1
POU2F2	1
RELA	1
REST	1
RUNX3	1
SP1	1
SPI1	1
STAT3	1
STAT5A	1
TBL1XR1	1
TCF12	1
TCF3	1
TEAD4	1
TFE3	1
USF1	1
YY1	1
ZNF354C	1
Grand Total	61
Count of TF
Row Labels	Total
ChromRem	2
CHD1	1
HLTF	1
Cyclin	1
CCNT2	1
DNARep	1
WRNIP1	1
HISase	7
CBX3	1
HDAC1	1
HDAC2	1
KDM5B	1
RBBP5	1
SETDB1	1
TRIM28	1
TFNS	4
CBFB	1
GTF2F1	1
HMGN3	1
TAF7	1
TFSS	58
ARNT	1
ATF3	1
BACH1	1
BACH2	1
BCL11A	1
BCL6	1
BCLAF1	1
CEBPD	1
CREB1	1
CTCFL	1
E2F1	1
E2F4	1
E2F6	1
ESR1	1
ETS1	1
FOSL1	1
FOSL2	1
FOXA2	1
FOXP2	1
GABPA	1
GATA1	1
GFI1	1
HNF4A	1
HNF4G	1
IRF1	1
IRF4	1
JUNB	1
LMO2	1
MEF2C	1
MEIS1	1
MXI1	1
NFIA	1
NFYB	1
NKX2-1	1
NOBOX	1
NR2F2	1
NR3C1	1
NR5A2	1
PRDM1	1
RFX5	1
RUNX2	1
RXRA	1
SRF	1
STAT1	1
TAL1	1
TBX5	1
TCF7L2	1
TFAP2A	1
TFAP2C	1
UBTF	1
USF2	1
WT1	1
ZBTB33	1
ZBTB7A	1
ZEB1	1
ZKSCAN1	1
ZNF143	1
ZNF263	1
Grand Total	73
Count of TF
Row Labels	Total
ChromRem	5
BPTF	1
SMARCA4	1
SMARCB1	1
SMARCC1	1
SMARCC2	1
DNARep	1
MBD4	1
HISase	8
EZH2	1
HDAC6	1
HDAC8	1
KDM5A	1
PHF8	1
SAP30	1
SIRT6	1
SUZ12	1
Pol3F	5
BDP1	1
BRF1	1
GTF3C2	1
POLR3A	1
POLR3G	1
RNAbinding	1
RPS8	1
TFNS	2
CTBP2	1
GTF2B	1
TFSS	54
AHR	1
ALX1	1
CRX	1
DMRT3	1
ELK1	1
ELK4	1
ESRRA	1
ETV7	1
HIC1	1
HIF1A	1
HOXA7	1
HSF1	1
IRF3	1
LHX3	1
MYBL2	1
NANOG	1
NFE2	1
NFIL3	1
NFYA	1
NKX2-2	1
NKX2-5	1
NKX3-1	1
NR2C2	1
NR5A1	1
NRF1	1
ONECUT1	1
PBX3	1
PDX1	1
POU5F1	1
PPARGC1A	1
RBPJ	1
RORA	1
SIX5	1
SMAD3	1
SOX10	1
SP2	1
SP4	1
SPZ1	1
SREBF2	1
SREBP1	1
SRY	1
STAT2	1
SUPT20H	1
TFCP2	1
THAP1	1
TP53	1
VSX2	1
ZBTB18	1
ZIC3	1
ZNF217	1
ZNF219	1
ZNF274	1
ZNF384	1
ZZZ3	1
(blank)
(blank)
Grand Total	76

## Sheet: mRNA_I-II-III
TF	PolyA_RNA-seq		TF	I	PolyA_RNA-seq		TF	II	PolyA_RNA-seq		TF	III	PolyA_RNA-seq
FOS	12.3		FOS	FOS	12.3		FOS		12.3		FOS		12.3
RPS8	11.7		RPS8		11.7		RPS8		11.7		RPS8	RPS8	11.7
JUN	11.1		JUN	JUN	11.1		JUN		11.1		JUN		11.1
JUNB	10.7		JUNB		10.7		JUNB	JUNB	10.7		JUNB		10.7
EGR1	9.99		EGR1	EGR1	9.99		EGR1		9.99		EGR1		9.99
ETS1	9.68		ETS1		9.68		ETS1	ETS1	9.68		ETS1		9.68
JUND	9.48		JUND	JUND	9.48		JUND		9.48		JUND		9.48
LEF1	8.47		LEF1	LEF1	8.47		LEF1		8.47		LEF1		8.47
RUNX3	7.95		RUNX3	RUNX3	7.95		RUNX3		7.95		RUNX3		7.95
TRIM28	7.92		TRIM28		7.92		TRIM28	TRIM28	7.92		TRIM28		7.92
IKZF1	7.69		IKZF1	IKZF1	7.69		IKZF1		7.69		IKZF1		7.69
CHD2	7.5		CHD2	CHD2	7.5		CHD2		7.5		CHD2		7.5
STAT1	7.43		STAT1		7.43		STAT1	STAT1	7.43		STAT1		7.43
MAZ	7.41		MAZ	MAZ	7.41		MAZ		7.41		MAZ		7.41
IRF3	7.27		IRF3		7.27		IRF3		7.27		IRF3	IRF3	7.27
USF2	7.25		USF2		7.25		USF2	USF2	7.25		USF2		7.25
HDAC1	7.21		HDAC1		7.21		HDAC1	HDAC1	7.21		HDAC1		7.21
IRF1	7.1		IRF1		7.1		IRF1	IRF1	7.1		IRF1		7.1
BCLAF1	7.09		BCLAF1		7.09		BCLAF1	BCLAF1	7.09		BCLAF1		7.09
RAD21	6.99		RAD21	RAD21	6.99		RAD21		6.99		RAD21		6.99
CBX3	6.92		CBX3		6.92		CBX3	CBX3	6.92		CBX3		6.92
TAF7	6.84		TAF7		6.84		TAF7	TAF7	6.84		TAF7		6.84
UBTF	6.64		UBTF		6.64		UBTF	UBTF	6.64		UBTF		6.64
ELF1	6.62		ELF1	ELF1	6.62		ELF1		6.62		ELF1		6.62
MAX	6.58		MAX	MAX	6.58		MAX		6.58		MAX		6.58
MYC	6.55		MYC	MYC	6.55		MYC		6.55		MYC		6.55
STAT2	6.48		STAT2		6.48		STAT2		6.48		STAT2	STAT2	6.48
RELA	6.47		RELA	RELA	6.47		RELA		6.47		RELA		6.47
STAT3	6.45		STAT3	STAT3	6.45		STAT3		6.45		STAT3		6.45
RORA	6.42		RORA		6.42		RORA		6.42		RORA	RORA	6.42
BPTF	6.39		BPTF	BATF	6.39		BPTF		6.39		BPTF	BPTF	6.39
ELK4	6.35		ELK4		6.35		ELK4		6.35		ELK4	ELK4	6.35
POLR2A	6.33		POLR2A	POLR2A	6.33		POLR2A		6.33		POLR2A		6.33
BHLHE40	6.21		BHLHE40	BHLHE40	6.21		BHLHE40		6.21		BHLHE40		6.21
PRDM1	6.13		PRDM1		6.13		PRDM1	PRDM1	6.13		PRDM1		6.13
SMARCC2	6.12		SMARCC2		6.12		SMARCC2		6.12		SMARCC2	SMARCC2	6.12
EP300	6.09		EP300	EP300	6.09		EP300		6.09		EP300		6.09
HMGN3	6.07		HMGN3		6.07		HMGN3	HMGN3	6.07		HMGN3		6.07
CBFB	6.05		CBFB		6.05		CBFB	CBFB	6.05		CBFB		6.05
KDM5A	6.02		KDM5A		6.02		KDM5A		6.02		KDM5A	KDM5A	6.02
HIF1A	5.99		HIF1A		5.99		HIF1A		5.99		HIF1A	HIF1A	5.99
YY1	5.98		GTF2F1		5.98		GTF2F1	GTF2F1	5.98		GTF2F1		5.98
GTF2F1	5.98		YY1	YY1	5.98		YY1		5.98		YY1		5.98
STAT5A	5.97		STAT5A	STAT5A	5.97		STAT5A		5.97		STAT5A		5.97
SUPT20H	5.96		SUPT20H		5.96		SUPT20H		5.96		SUPT20H	SUPT20H	5.96
USF1	5.94		USF1	USF1	5.94		USF1		5.94		USF1		5.94
E2F4	5.89		E2F4		5.89		E2F4	E2F4	5.89		E2F4		5.89
TCF3	5.85		TCF3	TCF3	5.85		TCF3		5.85		TCF3		5.85
GATA3	5.81		GATA3	GATA3	5.81		GATA3		5.81		GATA3		5.81
RFX5	5.78		RFX5		5.78		RFX5	RFX5	5.78		RFX5		5.78
TBL1XR1	5.75		TBL1XR1	TBL1XR1	5.75		TBL1XR1		5.75		TBL1XR1		5.75
ZNF384	5.74		ZNF384		5.74		ZNF384		5.74		ZNF384	ZNF384	5.74
CHD1	5.71		CHD1		5.71		CHD1	CHD1	5.71		CHD1		5.71
SMARCA4	5.71		SMARCA4		5.71		SMARCA4		5.71		SMARCA4	SMARCA4	5.71
HSF1	5.7		HSF1		5.7		HSF1		5.7		HSF1	HSF1	5.7
CREB1	5.68		CREB1		5.68		CREB1	CREB1	5.68		CREB1		5.68
HDAC2	5.67		HDAC2		5.67		HDAC2	HDAC2	5.67		HDAC2		5.67
ZNF217	5.67		ZNF217		5.67		ZNF217		5.67		ZNF217	ZNF217	5.67
NR3C1	5.66		NR3C1		5.66		NR3C1	NR3C1	5.66		NR3C1		5.66
HDAC6	5.59		HDAC6		5.59		HDAC6		5.59		HDAC6	HDAC6	5.59
SREBP1	5.58		SREBP1		5.58		SREBP1		5.58		SREBP1	SREBP1	5.58
FOSL2	5.55		FOSL2		5.55		FOSL2	FOSL2	5.55		FOSL2		5.55
BATF	5.53		BATF		5.53		BATF	BCL11A	5.53		BATF		5.53
SIN3A	5.49		SIN3A	SIN3A	5.49		SIN3A		5.49		SIN3A		5.49
GTF3C2	5.47		GTF3C2		5.47		GTF3C2		5.47		GTF3C2	GTF3C2	5.47
NFE2L1	5.43		NFE2L1	NFE2L1	5.43		NFE2L1		5.43		NFE2L1		5.43
SMARCC1	5.39		SMARCC1		5.39		SMARCC1		5.39		SMARCC1	SMARCC1	5.39
SP1	5.38		CTCF	CTCF	5.38		CTCF		5.38		CTCF		5.38
CTCF	5.38		SP1	SP1	5.38		SP1		5.38		SP1		5.38
SMAD3	5.36		SMAD3		5.36		SMAD3		5.36		SMAD3	SMAD3	5.36
ZZZ3	5.36		ZZZ3		5.36		ZZZ3		5.36		ZZZ3	ZZZ3	5.36
REST	5.34		REST	REST	5.34		REST		5.34		REST		5.34
ATF2	5.33		ATF2	ATF2	5.33		ATF2		5.33		ATF2		5.33
CCNT2	5.31		CCNT2		5.31		CCNT2	CCNT2	5.31		CCNT2		5.31
SREBF2	5.3		SREBF2		5.3		SREBF2		5.3		SREBF2	SREBF2	5.3
RBPJ	5.24		RBPJ		5.24		RBPJ		5.24		RBPJ	RBPJ	5.24
TCF12	5.21		GTF2B		5.21		GTF2B		5.21		GTF2B	GTF2B	5.21
GTF2B	5.21		TCF12	TCF12	5.21		TCF12	TCF7L2	5.21		TCF12		5.21
TAF1	5.19		NR2C2		5.19		NR2C2		5.19		NR2C2	NR2C2	5.19
ZNF263	5.19		TAF1	TAF1	5.19		TAF1		5.19		TAF1		5.19
NR2C2	5.19		ZNF263		5.19		ZNF263	ZNF263	5.19		ZNF263		5.19
SMARCB1	5.18		SMARCB1		5.18		SMARCB1		5.18		SMARCB1	SMARCB1	5.18
SETDB1	5.17		SETDB1		5.17		SETDB1	SETDB1	5.17		SETDB1		5.17
SPI1	5.15		ATF1	ATF1	5.15		ATF1		5.15		ATF1		5.15
ATF1	5.15		SPI1	SPI1	5.15		SPI1		5.15		SPI1		5.15
WRNIP1	5.11		WRNIP1		5.11		WRNIP1	WRNIP1	5.11		WRNIP1		5.11
AHR	5.09		AHR		5.09		AHR		5.09		AHR	AHR	5.09
SP4	5.07		SP4		5.07		SP4		5.07		SP4	SP4	5.07
TP53	5.06		SUZ12		5.06		SUZ12		5.06		SUZ12	SUZ12	5.06
SUZ12	5.06		TP53		5.06		TP53		5.06		TP53	TP53	5.06
BDP1	5.05		BDP1		5.05		BDP1		5.05		BDP1	BDP1	5.05
PML	5.04		PML	PML	5.04		PML		5.04		PML		5.04
NFIC	4.95		NFIC	NFIC	4.95		NFIC		4.95		NFIC		4.95
NFYA	4.95		NFYA		4.95		NFYA		4.95		NFYA	NFYA	4.95
SP2	4.94		SP2		4.94		SP2		4.94		SP2	SP2	4.94
SMC3	4.92		SMC3	SMC3	4.92		SMC3		4.92		SMC3		4.92
MXI1	4.89		MXI1		4.89		MXI1	MXI1	4.89		MXI1		4.89
MBD4	4.88		MBD4		4.88		MBD4		4.88		MBD4	MBD4	4.88
ZEB1	4.87		ZEB1		4.87		ZEB1	ZEB1	4.87		ZEB1		4.87
ZNF274	4.86		ZNF274		4.86		ZNF274		4.86		ZNF274	ZNF274	4.86
POU2F2	4.84		POU2F2	POU2F2	4.84		POU2F2		4.84		POU2F2		4.84
ZNF143	4.81		ZNF143		4.81		ZNF143	ZNF143	4.81		ZNF143		4.81
TFCP2	4.8		TFCP2		4.8		TFCP2		4.8		TFCP2	TFCP2	4.8
NFATC1	4.75		NFATC1	NFATC1	4.75		NFATC1		4.75		NFATC1		4.75
ZBTB7A	4.74		ZBTB7A		4.74		ZBTB7A	ZBTB7A	4.74		ZBTB7A		4.74
GFI1	4.73		GFI1		4.73		GFI1	GFI1	4.73		GFI1		4.73
PHF8	4.7		PHF8		4.7		PHF8		4.7		PHF8	PHF8	4.7
ELK1	4.68		ELK1		4.68		ELK1		4.68		ELK1	ELK1	4.68
CEBPB	4.63		CEBPB	CEBPB	4.63		CEBPB	CEBPD	4.63		CEBPB		4.63
NFYB	4.63		NFYB		4.63		NFYB	NFYB	4.63		NFYB		4.63
CTBP2	4.58		CTBP2		4.58		CTBP2		4.58		CTBP2	CTBP2	4.58
MEF2A	4.57		ATF3		4.57		ATF3	ATF3	4.57		ATF3		4.57
ATF3	4.57		MEF2A	MEF2A	4.57		MEF2A		4.57		MEF2A		4.57
ZKSCAN1	4.56		ZKSCAN1		4.56		ZKSCAN1	ZKSCAN1	4.56		ZKSCAN1		4.56
GABPA	4.54		ARNT		4.54		ARNT	ARNT	4.54		ARNT		4.54
ARNT	4.54		GABPA		4.54		GABPA	GABPA	4.54		GABPA		4.54
MAFF	4.49		MAFF	MAFF	4.49		MAFF	MEF2C	4.49		MAFF		4.49
SRF	4.49		SRF		4.49		SRF	SRF	4.49		SRF	SRY	4.49
ZBTB18	4.46		ZBTB18		4.46		ZBTB18		4.46		ZBTB18	ZBTB18	4.46
NFIL3	4.38		NFIL3		4.38		NFIL3		4.38		NFIL3	NFIL3	4.38
ZBTB33	4.35		ZBTB33		4.35		ZBTB33	ZBTB33	4.35		ZBTB33		4.35
BCL3	4.34		BCL3	BCL3	4.34		BCL3		4.34		BCL3		4.34
BCL6	4.32		BCL6		4.32		BCL6	BCL6	4.32		BCL6		4.32
TFE3	4.31		TFE3	TFE3	4.31		TFE3		4.31		TFE3		4.31
ESRRA	4.29		ESRRA		4.29		ESRRA		4.29		ESRRA	ESRRA	4.29
BRF1	4.28		BRF1		4.28		BRF1		4.28		BRF1	BRF1	4.28
MAFK	4.25		MAFK	MAFK	4.25		MAFK	MEIS1	4.25		MAFK		4.25
RUNX2	4.24		RUNX2		4.24		RUNX2	RUNX2	4.24		RUNX2		4.24
BACH1	4.18		BACH1		4.18		BACH1	BACH1	4.18		BACH1		4.18
SIRT6	4.11		SIRT6		4.11		SIRT6		4.11		SIRT6	SIRT6	4.11
CEBPD	4.1		CEBPD		4.1		CEBPD		4.1		CEBPD		4.1
NRF1	4.1		NRF1		4.1		NRF1		4.1		NRF1	NRF1	4.1
TBP	4.03		TBP	TBP	4.03		TBP		4.03		TBP		4.03
BACH2	4.02		BACH2		4.02		BACH2	BACH2	4.02		BACH2		4.02
MTA3	3.89		MTA3	MTA3	3.89		MTA3		3.89		MTA3		3.89
RBBP5	3.88		RBBP5		3.88		RBBP5	RBBP5	3.88		RBBP5		3.88
KDM5B	3.84		KDM5B		3.84		KDM5B	KDM5B	3.84		KDM5B		3.84
RXRA	3.7		RXRA		3.7		RXRA	RXRA	3.7		RXRA		3.7
MEF2C	3.69		MEF2C		3.69		MEF2C		3.69		MEF2C		3.69
HLTF	3.67		HLTF		3.67		HLTF	HLTF	3.67		HLTF		3.67
PBX3	3.65		PBX3		3.65		PBX3		3.65		PBX3	PBX3	3.65
RCOR1	3.6		RCOR1	RCOR1	3.6		RCOR1		3.6		RCOR1		3.6
POLR3A	3.5		POLR3A		3.5		POLR3A		3.5		POLR3A	POLR3A	3.5
EZH2	3.47		EZH2		3.47		EZH2		3.47		EZH2	EZH2	3.47
HDAC8	3.41		HDAC8		3.41		HDAC8		3.41		HDAC8	HDAC8	3.41
THAP1	3.39		THAP1		3.39		THAP1		3.39		THAP1	THAP1	3.39
LMO2	3.24		LMO2		3.24		LMO2	LMO2	3.24		LMO2		3.24
SAP30	3.15		SAP30		3.15		SAP30		3.15		SAP30	SAP30	3.15
IRF4	3.06		IRF4		3.06		IRF4	IRF4	3.06		IRF4		3.06
E2F6	2.81		E2F6		2.81		E2F6	E2F6	2.81		E2F6		2.81
ZNF354C	2.78		ZNF354C	ZNF354C	2.78		ZNF354C		2.78		ZNF354C		2.78
ARID3A	2.65		ARID3A	ARID3A	2.65		ARID3A		2.65		ARID3A		2.65
TCF7L2	2.48		TCF7L2		2.48		TCF7L2		2.48		TCF7L2		2.48
ZNF219	2.39		ZNF219		2.39		ZNF219		2.39		ZNF219	ZNF219	2.39
MYB	2.27		FOXM1	FOXM1	2.27		FOXM1		2.27		FOXM1		2.27
FOXM1	2.27		MYB	MYB	2.27		MYB		2.27		MYB		2.27
ESR1	2.23		ESR1		2.23		ESR1		2.23		ESR1		2.23
NFE2	2.17		NFE2		2.17		NFE2		2.17		NFE2	NFE2	2.17
NFIA	1.98		NFIA		1.98		NFIA	NFIA	1.98		NFIA		1.98
MYBL2	1.93		MYBL2		1.93		MYBL2		1.93		MYBL2	MYBL2	1.93
BRCA1	1.81		BRCA1	BRCA1	1.81		BRCA1		1.81		BRCA1		1.81
HIC1	1.8		HIC1		1.8		HIC1		1.8		HIC1	HIC1	1.8
BCL11A	1.76		BCL11A		1.76		BCL11A		1.76		BCL11A		1.76
ETV7	1.57		ETV7		1.57		ETV7		1.57		ETV7	ETV7	1.57
E2F1	1.53		E2F1		1.53		E2F1	E2F1	1.53		E2F1		1.53
POLR3G	1.51		POLR3G		1.51		POLR3G		1.51		POLR3G	POLR3G	1.51
PAX5	1.24		PAX5	PAX5	1.24		PAX5		1.24		PAX5		1.24
TEAD4	1.19		SIX5		1.19		SIX5		1.19		SIX5	SIX5	1.19
SIX5	1.19		TEAD4	TEAD4	1.19		TEAD4		1.19		TEAD4		1.19
NKX3-1	1.13		NKX3-1		1.13		NKX3-1		1.13		NKX3-1	NKX3-1	1.13
FOSL1	0.86		FOSL1		0.86		FOSL1	FOSL1	0.86		FOSL1		0.86
MEIS1	0.85		MEIS1		0.85		MEIS1		0.85		MEIS1		0.85
TAL1	0.8		NR2F2		0.8		NR2F2	NR2F2	0.8		NR2F2		0.8
NR2F2	0.8		TAL1		0.8		TAL1	TAL1	0.8		TAL1		0.8
GATA2	0.72		GATA2	GATA2	0.72		GATA2		0.72		GATA2		0.72
POU5F1	0.52		POU5F1		0.52		POU5F1		0.52		POU5F1	POU5F1	0.52
EBF1	0.5		EBF1	EBF1	0.5		EBF1	ESR1	0.5		EBF1		0.5
GATA1	0.26		GATA1		0.26		GATA1	GATA1	0.26		GATA1		0.26
PPARGC1A	0.24		PPARGC1A		0.24		PPARGC1A		0.24		PPARGC1A	PPARGC1A	0.24
FOXP2	0.19		FOXP2		0.19		FOXP2	FOXP2	0.19		FOXP2		0.19
TFAP2A	0.18		TFAP2A		0.18		TFAP2A	TFAP2A	0.18		TFAP2A		0.18
HOXA7	0.15		HOXA7		0.15		HOXA7		0.15		HOXA7	HOXA7	0.15
NANOG	0.14		NANOG		0.14		NANOG		0.14		NANOG	NANOG	0.14
FOXA1	0.12		FOXA1	FOXA1	0.12		FOXA1		0.12		FOXA1		0.12
SRY	0.11		NR5A1		0.11		NR5A1		0.11		NR5A1	NR5A1	0.11
NR5A1	0.11		SRY		0.11		SRY		0.11		SRY		0.11
HNF4A	0.08		HNF4A		0.08		HNF4A	HNF4A	0.08		HNF4A		0.08
NR5A2	0.08		NR5A2		0.08		NR5A2	NR5A2	0.08		NR5A2		0.08
CDX1	0.07		CDX1	CDX1	0.07		CDX1		0.07		CDX1		0.07
LHX3	0.07		LHX3		0.07		LHX3		0.07		LHX3	LHX3	0.07
NOBOX	0.06		NOBOX		0.06		NOBOX	NOBOX	0.06		NOBOX		0.06
SOX10	0.06		SOX10		0.06		SOX10		0.06		SOX10	SOX10	0.06
FOXA2	0.04		CRX		0.04		CRX	CTCFL	0.04		CRX	CRX	0.04
WT1	0.04		FOXA2		0.04		FOXA2	FOXA2	0.04		FOXA2		0.04
CRX	0.04		WT1		0.04		WT1	WT1	0.04		WT1		0.04
HNF4G	0.03		ALX1		0.03		ALX1		0.03		ALX1	ALX1	0.03
NKX2-1	0.03		HNF4G		0.03		HNF4G	HNF4G	0.03		HNF4G		0.03
TBX5	0.03		NKX2-1		0.03		NKX2-1	NKX2-1	0.03		NKX2-1		0.03
NKX2-5	0.03		NKX2-2		0.03		NKX2-2		0.03		NKX2-2	NKX2-2	0.03
NKX2-2	0.03		NKX2-5		0.03		NKX2-5		0.03		NKX2-5	NKX2-5	0.03
ALX1	0.03		TBX5		0.03		TBX5	TBX5	0.03		TBX5		0.03
VSX2	0.03		VSX2		0.03		VSX2		0.03		VSX2	VSX2	0.03
PAX4	0.01		CTCFL		0.01		CTCFL		0.01		CTCFL		0.01
TFAP2C	0.01		DMRT3		0.01		DMRT3		0.01		DMRT3	DMRT3	0.01
CTCFL	0.01		ONECUT1		0.01		ONECUT1		0.01		ONECUT1	ONECUT1	0.01
SPZ1	0.01		PAX4	PAX4	0.01		PAX4		0.01		PAX4		0.01
PDX1	0.01		PDX1		0.01		PDX1		0.01		PDX1	PDX1	0.01
DMRT3	0.01		SPZ1		0.01		SPZ1		0.01		SPZ1	SPZ1	0.01
ONECUT1	0.01		TFAP2C		0.01		TFAP2C	TFAP2C	0.01		TFAP2C		0.01
ZIC3	0.01		ZIC3		0.01		ZIC3		0.01		ZIC3	ZIC3	0.01
I	PolyA_RNA-seq							II	PolyA_RNA-seq							III	PolyA_RNA-seq
FOS	12.3							JUNB	10.7							RPS8	11.7
JUN	11.1							ETS1	9.68							IRF3	7.27
EGR1	9.99							TRIM28	7.92							STAT2	6.48
JUND	9.48							STAT1	7.43							RORA	6.42
LEF1	8.47							USF2	7.25							BPTF	6.39
RUNX3	7.95							HDAC1	7.21							ELK4	6.35
IKZF1	7.69							IRF1	7.1							SMARCC2	6.12
CHD2	7.5							BCLAF1	7.09							KDM5A	6.02
MAZ	7.41							CBX3	6.92							HIF1A	5.99
RAD21	6.99							TAF7	6.84							SUPT20H	5.96
ELF1	6.62							UBTF	6.64							ZNF384	5.74
MAX	6.58							PRDM1	6.13							SMARCA4	5.71
MYC	6.55							HMGN3	6.07							HSF1	5.7
RELA	6.47							CBFB	6.05							ZNF217	5.67
STAT3	6.45							GTF2F1	5.98							HDAC6	5.59
BATF	6.39							E2F4	5.89							SREBP1	5.58
POLR2A	6.33							RFX5	5.78							GTF3C2	5.47
BHLHE40	6.21							CHD1	5.71							SMARCC1	5.39
EP300	6.09							CREB1	5.68							SMAD3	5.36
YY1	5.98							HDAC2	5.67							ZZZ3	5.36
STAT5A	5.97							NR3C1	5.66							SREBF2	5.3
USF1	5.94							FOSL2	5.55							RBPJ	5.24
TCF3	5.85							BCL11A	5.53							GTF2B	5.21
GATA3	5.81							CCNT2	5.31							NR2C2	5.19
TBL1XR1	5.75							TCF7L2	5.21							SMARCB1	5.18
SIN3A	5.49							ZNF263	5.19							AHR	5.09
NFE2L1	5.43							SETDB1	5.17							SP4	5.07
CTCF	5.38							WRNIP1	5.11							SUZ12	5.06
SP1	5.38							MXI1	4.89							TP53	5.06
REST	5.34							ZEB1	4.87							BDP1	5.05
ATF2	5.33							ZNF143	4.81							NFYA	4.95
TCF12	5.21							ZBTB7A	4.74							SP2	4.94
TAF1	5.19							GFI1	4.73							MBD4	4.88
ATF1	5.15							CEBPD	4.63							ZNF274	4.86
SPI1	5.15							NFYB	4.63							TFCP2	4.8
PML	5.04							ATF3	4.57							PHF8	4.7
NFIC	4.95							ZKSCAN1	4.56							ELK1	4.68
SMC3	4.92							ARNT	4.54							CTBP2	4.58
POU2F2	4.84							GABPA	4.54							SRY	4.49
NFATC1	4.75							MEF2C	4.49							ZBTB18	4.46
CEBPB	4.63							SRF	4.49							NFIL3	4.38
MEF2A	4.57							ZBTB33	4.35							ESRRA	4.29
MAFF	4.49							BCL6	4.32							BRF1	4.28
BCL3	4.34							MEIS1	4.25							SIRT6	4.11
TFE3	4.31							RUNX2	4.24							NRF1	4.1
MAFK	4.25							BACH1	4.18							PBX3	3.65
TBP	4.03							BACH2	4.02							POLR3A	3.5
MTA3	3.89							RBBP5	3.88							EZH2	3.47
RCOR1	3.6							KDM5B	3.84							HDAC8	3.41
ZNF354C	2.78							RXRA	3.7							THAP1	3.39
ARID3A	2.65							HLTF	3.67							SAP30	3.15
FOXM1	2.27							LMO2	3.24							ZNF219	2.39
MYB	2.27							IRF4	3.06							NFE2	2.17
BRCA1	1.81							E2F6	2.81							MYBL2	1.93
PAX5	1.24							NFIA	1.98							HIC1	1.8
TEAD4	1.19							E2F1	1.53							ETV7	1.57
GATA2	0.72							FOSL1	0.86							POLR3G	1.51
EBF1	0.5							NR2F2	0.8							SIX5	1.19
FOXA1	0.12							TAL1	0.8							NKX3-1	1.13
CDX1	0.07							ESR1	0.5							POU5F1	0.52
PAX4	0.01							GATA1	0.26							PPARGC1A	0.24
								FOXP2	0.19							HOXA7	0.15
median	5.33							TFAP2A	0.18							NANOG	0.14
average	5.13377							HNF4A	0.08							NR5A1	0.11
								NR5A2	0.08							LHX3	0.07
								NOBOX	0.06							SOX10	0.06
								CTCFL	0.04							CRX	0.04
								FOXA2	0.04							ALX1	0.03
								WT1	0.04							NKX2-2	0.03
								HNF4G	0.03							NKX2-5	0.03
								NKX2-1	0.03							VSX2	0.03
								TBX5	0.03							DMRT3	0.01
								TFAP2C	0.01							ONECUT1	0.01
																PDX1	0.01
								median	4.56							SPZ1	0.01
								average	4.08301							ZIC3	0.01
																median	4.535
																average	3.68395

## Sheet: Matrixmarkers&cytokLegendplex
	IL9	IL21	IL22	IL17F	IL17A	CD69	CD40LG	IL2RA	FASLG	PDCD1
ARID3A	0	1	0	0	0	1	0	1	1	0
ATF1	0	1	0	0	0	1	0	0	1	0
ATF2	0	1	0	0	1	1	0	1	0	1
ATF3	0	1	0	0	0	1	0	1	1	0
BACH1	0	1	0	0	0	1	0	0	0	0
BATF	0	1	1	0	1	1	1	1	1	1
BCL11A	0	1	1	0	1	1	1	1	1	1
BCL3	0	0	0	0	1	1	0	0	0	0
BCLAF1	0	0	0	0	0	1	0	1	0	0
BDP1	0	0	0	0	0	0	0	0	0	0
BHLHE40	0	1	0	0	1	1	0	1	1	0
BRCA1	0	0	0	0	0	0	0	1	0	0
BRF1	0	0	0	0	0	0	0	0	0	0
BRF2	0	0	1	0	0	0	0	0	0	0
CBX3	0	1	0	0	0	1	0	1	1	1
CCNT2	0	1	0	0	0	1	0	1	0	0
CEBPB	1	1	1	1	1	1	1	1	1	0
CEBPD	0	0	0	0	0	0	0	0	0	0
CHD1	0	0	0	0	0	1	0	0	0	0
CHD2	0	1	0	0	0	1	0	1	1	1
CREB1	0	1	0	0	0	1	0	1	0	0
CTBP2	0	0	0	0	1	1	0	1	0	0
CTCF	1	1	0	1	1	1	1	1	1	1
CTCFL	0	1	0	1	0	1	0	1	0	0
E2F1	0	1	0	0	0	0	0	1	0	0
E2F4	0	0	0	0	0	0	0	1	0	0
E2F6	0	1	0	0	0	0	0	1	0	0
EBF1	0	0	1	0	1	1	0	1	0	1
EGR1	1	1	1	0	1	1	1	1	1	1
ELF1	0	1	0	0	1	1	0	1	1	1
ELK1	0	0	0	0	0	1	0	0	0	0
ELK4	0	0	0	0	0	1	0	0	0	0
EP300	1	1	1	1	1	1	0	1	1	1
ESR1	0	0	0	0	0	0	0	0	1	0
ESRRA	0	0	0	0	0	0	0	0	0	0
ETS1	0	0	0	0	0	0	0	0	0	0
EZH2	1	0	0	0	1	1	0	0	0	1
FAM48A	0	0	0	0	0	0	0	0	0	0
FOS	1	1	1	0	1	1	1	1	1	0
FOSL1	0	1	0	0	0	0	0	0	1	0
FOSL2	1	1	0	1	0	0	0	1	1	0
FOXA1	0	1	0	1	1	1	1	1	1	0
FOXA2	0	0	0	1	1	0	0	1	0	0
FOXM1	0	1	0	1	1	1	0	1	0	1
FOXP2	0	0	0	1	1	1	0	1	0	0
GABPA	0	1	0	0	0	1	0	0	0	1
GATA1	0	1	0	0	0	1	0	1	1	0
GATA2	0	1	0	1	1	1	0	1	1	0
GATA3	0	1	0	1	0	0	0	1	1	0
GTF2B	0	0	0	0	0	1	0	0	0	0
GTF2F1	0	0	0	0	0	1	0	1	0	0
GTF3C2	0	0	0	0	0	0	0	1	0	0
HDAC1	0	1	0	0	0	0	0	0	0	0
HDAC2	0	1	0	0	0	1	0	1	0	0
HDAC6	0	0	0	0	0	0	0	0	0	1
HDAC8	0	0	0	0	0	0	0	0	0	0
HMGN3	0	1	0	0	0	1	0	1	0	0
HNF4A	0	0	0	1	0	0	0	0	1	0
HNF4G	0	0	0	1	0	0	0	0	0	0
HSF1	0	0	0	0	0	0	0	0	0	1
IKZF1	0	0	0	0	1	0	0	0	1	1
IRF1	0	1	0	0	0	0	0	1	1	0
IRF3	0	1	0	0	0	0	0	0	0	0
IRF4	0	1	1	0	1	1	1	1	1	1
JUN	0	1	0	0	1	1	0	1	1	0
JUNB	1	0	0	0	0	1	0	0	1	0
JUND	0	1	0	1	1	1	0	1	1	0
KDM5A	0	0	0	0	0	0	0	0	0	0
KDM5B	0	1	0	0	0	1	0	1	0	0
MAFF	0	1	0	1	1	1	1	0	1	0
MAFK	0	1	0	1	1	0	1	0	1	0
MAX	0	1	0	0	0	1	0	1	1	1
MAZ	0	1	0	1	0	1	0	1	1	1
MBD4	0	0	0	0	0	0	0	0	0	0
MEF2A	0	1	0	0	1	1	0	1	1	1
MEF2C	0	1	0	0	1	1	0	1	0	1
MTA3	0	0	0	0	1	1	0	0	0	0
MXI1	0	1	0	0	0	1	0	1	0	1
MYBL2	0	0	0	0	0	0	0	1	0	0
MYC	0	1	0	0	0	1	0	1	1	1
NANOG	0	0	0	0	0	1	0	0	0	0
NFATC1	0	0	0	0	1	1	1	0	0	1
NFE2	0	0	0	0	0	0	0	0	0	0
NFIC	0	1	0	1	1	1	1	1	1	1
NFYA	0	1	0	0	0	0	0	1	0	0
NFYB	0	1	0	0	1	1	0	0	0	0
NR2C2	0	0	0	0	0	0	0	1	0	1
NR2F2	0	1	0	1	0	1	0	0	0	0
NR3C1	0	1	0	0	0	0	0	0	1	0
NRF1	0	1	0	0	0	0	0	1	0	0
PAX5	0	1	0	1	1	1	0	1	1	1
PBX3	0	1	0	0	0	0	0	1	0	1
PHF8	0	1	0	0	0	1	0	1	0	0
PML	0	0	0	1	1	1	0	1	0	0
POLR2A	0	1	0	1	1	1	0	1	1	1
POLR3G	0	0	0	0	0	0	0	0	0	0
POU2F2	0	1	0	0	1	1	0	1	1	1
POU5F1	0	0	0	0	0	0	0	1	0	0
PPARGC1A	0	0	0	0	0	0	0	0	0	0
PRDM1	0	0	1	0	0	0	0	0	0	0
RAD21	0	1	0	1	1	1	1	1	1	0
RBBP5	0	1	0	0	0	0	0	1	0	0
RCOR1	0	1	0	0	1	1	0	1	1	1
RELA	0	1	1	0	1	1	0	1	1	1
REST	1	1	0	0	1	1	0	1	0	1
RFX5	0	1	0	1	0	1	0	1	0	0
RUNX3	0	1	1	0	1	1	1	1	1	1
RXRA	0	0	0	1	0	0	0	1	0	0
SAP30	0	1	0	0	0	0	0	0	0	0
SETDB1	0	0	0	0	1	0	0	0	1	0
SIN3A	0	1	0	0	0	1	0	1	1	1
SIRT6	0	0	0	0	0	0	0	0	0	0
SIX5	0	0	0	0	0	0	0	0	0	0
SMARCA4	0	0	0	0	0	0	0	0	0	0
SMARCB1	0	0	0	0	0	0	0	0	0	0
SMARCC1	0	0	0	0	0	0	0	0	0	0
SMARCC2	0	0	0	0	0	0	0	0	0	0
SMC3	0	1	0	1	1	1	1	1	0	0
SP1	0	1	0	1	1	1	0	1	0	1
SP2	0	1	0	0	0	0	0	1	0	0
SP4	0	1	0	0	0	0	0	0	0	0
SPI1	0	1	1	1	1	1	1	1	1	1
SREBP1	0	1	0	0	0	0	0	0	0	0
SRF	0	1	0	1	0	1	0	1	0	0
STAT1	0	0	0	0	0	0	0	0	0	0
STAT2	0	0	0	0	0	0	0	0	1	0
STAT3	1	1	1	0	1	1	0	0	1	0
STAT5A	0	0	0	0	1	1	0	1	0	0
SUZ12	0	0	0	0	0	0	0	0	0	1
TAF1	0	1	0	1	0	1	0	1	0	1
TAF7	0	0	0	0	0	1	0	1	0	0
TAL1	0	1	0	0	0	1	0	1	0	0
TBL1XR1	0	0	0	0	1	1	0	1	1	1
TBP	0	1	0	0	0	1	0	1	0	1
TCF12	0	1	0	0	1	1	0	1	1	1
TCF3	0	0	0	0	1	1	0	1	0	1
TCF7L2	0	1	0	0	0	1	0	1	0	0
TEAD4	0	1	0	0	1	1	1	1	0	0
TFAP2A	0	0	0	0	0	0	0	1	1	0
TFAP2C	0	0	0	0	0	0	0	0	0	0
THAP1	0	0	0	0	0	0	0	1	0	0
TRIM28	0	0	0	0	0	1	1	1	1	0
UBTF	0	1	0	0	0	0	0	1	0	0
USF1	0	1	0	0	1	0	0	1	1	1
USF2	0	1	0	0	0	1	0	0	1	0
WRNIP1	0	0	0	0	0	1	0	1	1	0
YY1	0	1	0	1	1	1	1	1	1	1
ZBTB33	0	0	0	0	0	0	0	1	0	0
ZBTB7A	0	1	0	0	0	0	0	1	0	1
ZEB1	0	0	0	0	0	0	0	0	0	1
ZKSCAN1	0	0	0	0	0	0	0	0	0	0
ZNF143	0	1	0	1	1	1	1	1	1	1
ZNF217	0	0	0	0	0	0	0	0	0	0
ZNF263	1	1	0	0	1	0	0	1	0	0
ZNF274	0	0	0	0	0	0	0	0	0	0
ZZZ3	0	0	0	0	0	0	0	0	0	0
