# Supplementary material for: Differential Impact of CD43 and CD28 on T-Cell Differentiation Depending on the Order of Engagement with the TCR
Source: Int J Mol Sci. 2024 Mar 8;25(6):3135. doi: 10.3390/ijms25063135 (PMC10970108; doi:10.3390/ijms25063135)
Supplement: Supplementary file 1 [file ijms-25-03135-s001.zip › Table S1.csv]

	TCR donor 1	TCR donor 2	TCR donor 3	CD43 donor 1	CD43 donor 2	CD43 donor 3	TCR-CD43 donor 1	TCR-CD43 donor 2	TCR-CD43 donor 3	CD43+TCR donor 1	CD43+TCR donor 2	CD43+TCR donor 3	CD43-TCR donor 1	CD43-TCR donor 2	CD43-TCR donor 3	TCR donor 4	TCR donor 5	CD28 donor 4	CD28 donor 5	TCR-CD28 donor 4	TCR-CD28 donor 5	CD28+TCR donor 4	CD28+TCR donor 5	CD28-TCR donor 4	CD28-TCR donor 5
Anqioqenin	0.847131521204411	0.716973511444932	0.444759941615699	0.333850917728749	0.248557558810326	0.165634576543339	0.282204366473774	0.372117201275823	0.096064265670417	0.938577614686086	2.02219699248523	0.874812934939417	4.53754108234799	4.12041097038831	3.82957970777406	0.307438673260442	0.289197763828242	0.033338638115662	0.340525996789242	0.25575845071431	0.180477937437984	4.09025066931774	2.93195288924825	5.17201043516334	4.25425339684605
EGF	0.26583708906878	0.600867260381895	1.09803471911127	-0.165926401407868	1.55976608579129	0.479891772803838	0.0135717694034205	0.769941589495095	0.144706048917342	3.62106883160952	2.14363257862453	3.57781068138216	3.36790159588	4.19422275299463	3.39230728047376	2.56209854372061	0.629831022099869	1.87508698692105	1.29770490160745	2.02389023119673	1.66117804003825	5.01937292425355	4.80266706693401	4.78186780632366	3.98663719931375
ENA-78	1.2319129019545	0.899287322631187	0.515254466002494	0.801567995968312	0.21364584327066	0.698173706429388	0.500000474969324	0.307059838614585	0.434497467439074	3.61985678651323	2.23772656245568	3.16787287067805	4.82798041221155	4.3873335895372	4.79605802696508	1.12264193315725	-0.10560430208008	1.03735261384825	-0.0893380919792069	0.892670285326241	0.189993634612096	5.10498632102057	5.16219842642548	4.82820016621267	5.28382177569174
GCSF	1.90325589457127	0.843839468594482	0.479351579907426	1.21713632408034	1.39458823547525	0.907514444275918	0.544982548234988	0.435329934897393	0.480181908011433	1.84358787930098	1.368443323376	1.28004661689692	3.53674009635186	3.80986471388135	3.56086606332214	0.707709894650609	0.265848152937343	0.484001809022884	0.636712909471862	0.964136565104197	0.432177401150102	3.84356313853525	4.71722887191425	4.36782795432333	5.13041991484024
GM-CSF	1.27128608210896	0.104907225459619	1.7763943646398	1.68305978448866	0.480491611376289	1.70950347181814	0.811133531916753	0.367040763886648	0.954830696121503	1.86886871747403	0.74857251748675	1.33517347286332	3.24413219279964	2.99863540939664	3.49343455459357	1.62908218281285	0.684765166970323	2.54463224924482	0.310938632242491	1.2018530627823	0.674659227905942	3.57141925236906	3.82061841085497	4.16461400929911	5.20232463958284
GRO	0.24879027932109	-0.937324230424943	0.0882670984173635	0.63132103036652	0.231603045757749	0.231603045757749	0.196294604651181	-0.0186531727285138	-0.0186531727285138	-0.586079260877366	0.868252851994061	-0.126589730020613	1.13061289128685	1.49577696612453	1.74240074136795	0.24879027932109	0.722904003403492	0.737083875731878	0.781034232408583	0.195656388374496	1.87118209531666	1.01380040152379	4.4515904136166	1.52241785289411	4.89144260757133
GRO-a	0.393143764004325	0.109695127976224	0.835657731348476	1.04148012484422	-0.0753810865825669	0.42887405914686	0.679387015335092	0.434497467439074	0.332596065379355	1.20784541989108	4.20542399303958	1.13997319384849	4.80357100815868	4.68730801168485	4.79551041503387	0.465029927798141	0.54312075599724	1.39446166449096	0.185720845178151	0.222937030737372	1.76919793454444	2.93195288924825	3.9001105784797	5.5048700396537	5.06136948586933
I-309	0.537246157955363	2.55830680935271	0.564716266592875	0.714946842380186	0.351489349476668	0.776355297673137	0.369740607498542	1.134089781079	0.102136941326423	3.9450978377557	3.01101124962239	3.26309939844003	4.67482562134576	4.50008329318037	4.92773762753016	0.754195535393097	0.046340055971155	2.60632854801611	0.294122175753174	0.589743958984538	1.36429495951563	5.50766903882647	4.70748866166438	4.7694599993708	4.91253270169834
IFN-g	-0.225596404487117	0.697119711018783	-1.08296742405136	0.99543742340314	-2.05010842818869	0.0726545032113561	0.405436755634364	-2.35014243147563	-0.851005835717104	1.8482677253703	0.102289227121051	0.02186639329718	3.71798227613061	1.22078762165345	3.33262332995094	-1.88928772140272	0.86699934427629	1.17597923724718	0.763183692009002	0.665734115805108	2.11796397356078	3.16174404614955	4.86205339735437	2.78670151125365	4.78723060770402
IGF-1	-1.02594144280509	1.07385773327881	1.08443270333237	-1.32468860511157	0.517968958310564	0.686298221720237	-1.1846483716964	0.633289110088407	0.490169911650162	1.35466446695572	0.79183005388398	2.42841801159976	1.71979136960507	3.6686319007764	3.87154896859543	0.539273148660255	0.55711883731762	0.539209702351468	1.1131849589141	0.124595125769941	0.762064260350002	5.00766395931297	4.98520157640059	4.79079473255643	4.1791495882777
IL-10	0.341365652076774	1.92926314286233	0.310400030416265	0.879648154281172	0.955566982274806	0.766272527738349	0.0977868104977276	-0.316552930500563	0.163930138500594	0.868701382052123	0.607984004008243	0.682811913590212	2.68319146238876	2.55233708962415	2.62716499920612	2.59514077089391	1.73414268011076	3.60109536274088	2.04273396582606	3.34289368598526	2.4461502932614	4.57016981741127	3.07136009199965	3.40644907816779	3.6645548489297
IL-12	0.702019187884584	0.166332158378192	-0.197565465053617	0.914537841667461	0.767305190838722	0.0470008623326535	0.784050385033926	0.191968576797154	-0.11822285592302	4.5928145470974	4.16500269287037	3.63396394480742	5.04608899960292	4.58111851394661	4.34531977162132	0.103345012822888	0.221901291105019	-0.298163796765359	0.33998336741375	0.870917872982474	0.593896383278996	4.6684764059012	5.39739723226819	4.3396685106115	5.18106533772239
IL-13	0.342975005033867	0.446205461294943	0.0925363191232558	0.157898790475076	0.362201366496634	0.191823323229912	0.313984750954104	1.08949885885936	0.0679823110408076	1.33517347286332	1.02072769847557	0.590097014665063	3.542488376867	3.80949226776401	3.18920970300898	-0.106006766812889	0.457628648550602	1.76279872671881	0.416621636375453	2.4784338210794	0.706798855405624	3.87940879560552	3.50318903416586	2.73252875317588	4.74160159283182
IL-15	-0.108474953921407	0.110402096788103	0.195059922853199	0.0790400096624917	0.476701606929103	0.723523091882948	0.146804383972086	0.385622309560105	0.714516221055619	0.605218945788348	4.15429339874047	1.08535092962918	4.209192028828	4.89192818806332	4.76504959761344	0.12549876044914	0.282203571811138	0.478305891089533	0.146158467983343	1.1942522538415	1.06619484985779	4.39640479569126	4.57674043399488	5.03183469894362	5.23653022287038
IL-1a	1.19432095120684	-0.137173936532804	-0.401671250700384	1.1349172002101	-0.43485211984013	0.760829422019418	1.15019946427023	-0.796945229349261	0.0522715808787982	1.05925414446287	0.640380252146118	1.4948860140228	4.20652742400825	3.32987395100926	4.16943988108894	1.07464003646986	1.14129286933863	2.92425814647809	1.56353942902176	0.854183545277674	2.09642872928694	4.24473761361243	2.90598380151286	4.98336198373898	3.73845698485084
IL-1b	0.738919818726377	-0.191038745930452	0.0685815741641445	1.40547626217964	-0.892761919107735	0.419526790643265	1.0240106391067	-1.07659538328214	0.00391452126345387	4.90066500697986	2.16757396068678	4.43429939261812	4.0986787433626	2.82220561702614	4.59607090998551	2.56373985214919	0.993664021893333	3.99591074060176	0.461631989745116	2.47783877622604	2.24971122974305	6.03254908920484	5.02933080371952	5.53712553239684	4.90419129480562
IL-2	1.30520087636808	1.79213426930368	2.55641605925293	-0.263351646015581	0.00149939449594795	0.907490638927492	-0.0133692725577414	-0.719260882093961	0.763723477108027	3.85027303020795	3.49668813929617	4.3085104473853	3.84563124308381	3.30839099807471	4.46833315133765	2.43118077638361	0.353548760131178	1.20995246253262	0.251415078089014	2.09549558767531	1.35048657630229	4.95035159609291	5.17653583748856	4.30147756808514	5.05614034000093
IL-3	1.21274492253029	1.31037788237567	2.69276343909528	0.270629919613363	0.394647509376486	1.85998321657471	-0.559965175884737	0.557645024744958	1.16009702937006	0.964534344361991	1.88524980890063	4.07456962027498	3.08955727642611	4.40115952487466	4.48571050655698	2.11861796310414	1.12923144392586	1.00189066366095	1.63688401264747	2.21443064947568	1.47265507424156	4.4515904136166	3.5856592720288	3.96724631320638	4.04410723189723
IL-4	0.902688806147727	0.857672161047812	1.45578152684007	0.240449514053358	0.786670159850757	0.390585153309164	-0.18249442703865	0.543406427746883	0.830279077468371	3.69474291879429	1.31360108177868	4.47434707062214	3.73474270095715	3.71539537094449	4.12041097038831	1.61385589587585	0.375507884835979	1.24839250027176	0.330782682940366	1.72646357247321	0.467700481628627	4.86661991340145	5.17813660488386	4.33150952389026	5.0435755379958
IL-5	0.699129321596645	0.36901353164393	1.34953458549537	0.411478304111902	0.105852230402221	0.663893106134841	-0.11248517014672	0.321837050716155	0.399214539695585	0.967308518004852	0.656831141319066	1.08971735513192	3.23299075928566	3.13971495918577	3.4167573954482	3.29674606975332	0.533105372268426	3.66300023090014	0.582292267270336	3.83030308165568	1.0518907963851	4.89295334922076	3.97650134651534	4.06332513945542	4.37557620737598
IL-6	3.15384480311648	3.3786134122509	2.05838945933483	3.0995178080307	1.43337322066768	2.44092021038026	1.22156527101973	0.609374769807596	2.00589378466492	1.51459378661664	1.47438692093315	0.750225009304622	3.69269476663301	3.90549309845487	2.72255397720894	1.41226011481755	0.441123862567768	1.00778446093248	0.742725156350754	2.95379974885119	0.829884301575528	4.94117259107713	4.75170370637982	4.22656604427528	4.94023427905583
IL-7	0.498345182336267	0.203776113999161	0.665613647308165	0.284167790093152	0.769623684615468	-0.25558583470139	0.112791606143758	0.149032715590157	0.0397518535644095	0.678182920859161	4.08911627936483	0.727209462524724	4.51788835481825	4.69551142488232	4.6610545841828	0.873684685421734	0.831226865961701	-0.0506095316268904	0.990013167788198	1.57728059611651	0.490958131974262	3.92207548383646	5.46493006456703	5.02849170794884	5.3283292791515
IL-8	2.20439801869249	3.38063882293071	0.697119711018783	2.62986285032737	4.6767828555976	1.12258454265367	2.36777279438278	4.41469279965301	0.860494486709078	1.82339044668029	4.14683391793797	0.871069309303599	2.30179500700431	4.34871501227454	1.19825409972344	1.15660924187554	1.99270328472544	0.736063958461916	2.44283720234382	1.34911086397437	3.05588410785628	2.19171960141148	3.87427000190715	1.39256331366001	3.58985248861307
Leptin	0.359645154257391	0.0361268454484061	0.167607652504766	0.57543320491896	0.329356478556228	0.0427718596355033	0.172584331755572	0.396411458076915	-0.389570663782502	1.6104632163937	3.8218047285783	1.15355269682023	4.47819257097149	4.90826419009388	3.77990572101504	0.0497530351970994	0.702146711342387	0.20624532561464	1.57541904214228	0.133162031270365	0.68009355473311	4.42760115168359	5.07202696384174	4.98118403785009	5.0084049143315
MCP-1	0.727477053188688	0.766502421038892	2.46630438676207	-0.754076792809084	1.65330856260412	1.78018481627113	-0.42578144080078	-0.5006263461458	1.16892963262065	-0.186032485631515	1.47284039149958	1.93688722843906	2.76571123154318	2.89013276460789	4.52609655261509	0.30109539253331	1.24738855055428	0.156072757754097	0.981777212641424	0.24323190297887	1.6191242268957	3.87306156402183	4.55848948363974	4.51252330371051	4.87959049544197
MCP-2	0.769449013456965	0.246577788628203	1.887017414126	-0.564784772411828	1.00024624210889	1.03439206593422	-0.638518429146665	0.879791420478557	1.11858856994578	2.34952931723898	1.4946223840196	3.88484585480817	2.9798052924204	3.90413266942304	4.14784710119042	1.13976532920211	0.731240497734602	0.683622684966139	1.16153089878444	1.34471075223449	1.01684857026243	5.40634057384069	5.14111912244865	4.76179608016219	4.52943875892726
MCP-3	1.01885902725132	1.19348074628551	1.55211827294575	0.0670421127307177	0.390913402014158	0.720772651949693	0.16832796399193	0.323183376477815	0.822689274945826	0.454850722748094	0.916403455262517	1.82029746935396	4.21104416008418	4.26489449134198	4.50530724120994	0.421041220163302	1.2591268335574	0.144904208564989	1.51225092209367	0.670211427018323	1.65663499191764	3.44074827451402	4.38191463164559	4.81141610372165	3.82761569556064
MCSF	0.796531426788815	0.707557722324982	1.07361539149169	0.246841696445204	0.648153971328238	0.733424760341972	0.144706048917342	0.563815031666036	0.333892729076877	2.83497435712187	2.74132503225234	3.28723120718992	3.77775969090417	4.03737633659989	4.44398626624131	1.28142619456123	0.998435587472924	0.110710175877021	1.77555556114406	1.73020791408664	2.00525556838824	4.77420605066682	3.57597502226352	4.60055512199676	2.77719467228956
MDC	1.67792912747433	1.2591268335574	0.961376043538436	1.01269600442751	1.09001029111124	0.771463668912879	0.621704387958644	0.0580352419033884	0.551974590067946	2.18572015353536	3.55845650793101	3.67357607594721	3.65036934257952	4.26025984741604	4.39542564609675	1.03763366606592	1.70895710930108	0.680001009171933	1.84464068295778	1.26443572681024	2.11137046381006	5.04788092307433	4.74598117376814	4.95818249216763	4.11659275910686
MIG	0.594930034089022	-0.186912751428424	0.29345742520959	1.55589916284702	0.445917860971854	0.278141690058687	0.674228505211563	-0.292848612377728	0.172780998922942	1.08976735371256	3.8012693737176	0.561375201276867	4.76961876730631	4.0564400116605	4.59870707095245	-0.0471664930794371	0.397017818831347	-0.0252035834346918	0.309605288808877	0.171921490555517	0.288720892040194	3.23006441663637	4.71807967566089	4.94902679004605	4.53536766822779
MIP-1d	1.53225221722458	0.678615221978307	0.258561487224377	1.50051304500248	1.53415322951531	-0.0193968882178178	1.4520326877428	-0.171915841281079	-0.203230352392228	4.10810535758566	0.906468898006162	2.6967554775702	3.99082263433011	3.26739103715472	2.70314796450966	0.258561487224377	1.67792912747433	0.650549891732866	1.97717929054377	0.630297163565791	2.52376615862429	4.05981482658152	3.80329112801783	3.73255864899329	2.94690931700084
Neg	0.0435825708055197	0.408880304799751	0.426913426931822	-0.0387001632119888	0.243906200230477	0.0985667531997439	0.144013474258578	0.496292312653753	0.251091000343755	0.411811303248092	0.694417666690558	1.33031769149433	0.551493648576594	0.83410001201906	0.688760564988327	0.289646510520089	0.451173845783492	0.00889155157161046	0.391976164775898	0.113658411455401	0.513984308458514	0.860606775769307	1.14321313921177	0.880359956708292	1.16296632015076
Oncostatin_M	0.189966021773395	0.344257029964773	0.203109875123816	0.181357864915763	1.13310764859521	0.39264426468873	-0.0833207015234938	-0.104955180031816	0.186924513572129	3.67357607594721	0.367140016589908	3.8012693737176	2.99863540939664	2.54266352768474	3.23299075928566	0.654115206240978	0.708279810177844	0.933559012713397	1.09422169026433	1.03837644422464	0.174689707636324	5.78518141572331	2.29474480329855	4.98362148584952	1.66489804354269
PDGF_BB	0.125639727762049	0.421041220163302	0.545285090286726	0.582202334158062	0.9593237223677	0.603983297883084	0.194389021573931	0.337210012456275	0.100672823314086	3.83034029551268	2.33014632849838	3.17454721686527	4.74596654688323	4.56211964256515	4.43511916324852	0.219070567643439	-0.0324485924122507	0.583826296653066	0.720260933083894	0.200855904969667	0.0800863415370179	5.19714558563129	5.38446285367807	5.25506806982041	5.14561022781612
Pos	0.0557923315871622	-0.926919144725998	0.0557923315871622	0.0689500142063363	0.0689500142063363	0.0689500142063363	-0.113066987429169	-0.113066987429169	-0.113066987429169	-0.429413421816571	-0.0927472230578957	-0.247550647111487	-0.0979487579953363	0.272496384842403	0.272496384842403	0.0557923315871622	0.0557923315871622	0.665662802903675	0.665662802903675	0.420728740198666	0.420728740198666	0.13630158743271	0.82688530568631	0.366817727597315	0.542902556086896
RANTES	2.97490484239097	2.00942090612423	1.53956412921363	2.97552732236337	3.01196436893014	1.34252366675987	1.97559104235901	2.5769379432148	0.342587386755502	4.27428605176596	3.12693934079414	2.37341927223994	4.49301280790687	3.49421344408222	2.74941105449463	0.987066371847944	1.34190118678747	1.611429617276	1.81727492882915	1.65040112773437	2.07312114111599	3.20008240907607	3.08022240175695	3.11436886931453	2.39049333593381
SCF	1.34944073194925	0.228497158417368	-0.199191464471198	1.56450223206247	0.829875572902895	0.222850241849953	0.938119803961334	1.99452796599571	-0.131535204834074	2.75409309693412	3.74359739062581	1.47101034889553	4.92741315955224	4.49235338566215	3.6120726071216	0.626957246953359	0.948592445200448	0.523141594686071	1.02011307012724	2.16977791796373	1.23732097573338	4.21378973923318	4.16628183253551	4.42058104255415	4.68042177883224
SDF-1	0.397017818831347	0.890661250456165	-0.0649170863813188	0.956114712384201	0.864239208477669	0.641229474345637	0.462152546136027	0.0263917907177081	0.417856515265892	4.57534858344069	4.50079562179171	3.83497997391847	4.58375387767525	4.45952127774778	3.88723552207905	-0.754602775025718	0.894209165858224	-0.498164922623278	1.54233088698862	1.16529048578044	1.32368876759904	4.33010375283477	5.17852940745839	3.8091020822486	4.90227821818695
TARC	0.205060718730509	0.654115206240978	0.189370696062751	0.0747048033626338	0.420523176495941	0.214742040931658	0.198264445828131	0.438987763387988	0.674228505211563	4.17850227853919	4.81277368937631	3.78927413353603	4.46715311013913	5.16752612295191	4.48548219457387	-0.188614320956783	0.568145539041341	0.157234825619565	0.661795836146302	0.601820026070019	0.897411360746731	5.28159127807377	5.17667149531432	4.94257982726335	5.19780069213454
TGF-B1	0.324855142178224	0.642567417059218	-0.205729048712764	0.502153196890063	0.784828035162583	0.776763873539203	0.149032715590157	-0.39367245520382	-0.104955180031816	1.22825940674073	-0.326979983357868	0.292031439361847	3.30044949788488	3.18299778377495	2.80764713434714	-0.0740391127353501	1.12264193315725	0.168622930017386	1.14727784856212	0.544773640387223	0.754971032548281	3.82367103131633	3.18086795830867	4.30709602919506	4.75258851930004
Thrombopoietin	0.458604200716386	-0.28308805208539	0.467945721134506	0.99254906580514	-0.208939052860412	0.274599765846897	0.398823965229418	-0.0672725651521952	-0.358272086478249	2.88139161014338	1.15355269682023	2.50638865146757	4.52269259008732	3.86382200341409	2.90514924380012	0.48065964743259	1.41272635356792	0.91333025088113	1.95770409841329	1.04940893450079	1.84906453648045	5.21269419063102	4.18765258179534	5.35917715691686	3.26135470367016
TNF-a	-0.397514956217469	2.94462537486111	2.7043061600508	-0.398090126031028	0.177629185616989	1.76219115713387	-0.503450817166773	0.342587386755502	1.40963073048164	0.152888784885817	1.5182004341986	1.96825982777733	4.41456901222279	2.86000915230337	4.59323041864337	1.14129286933863	0.697119711018783	0.587193649813424	0.737083875731878	1.89232268670781	0.37653048265196	3.62560919004647	1.75456016944364	4.00785625436324	1.57955638815252
TNF-b	-0.060722404969007	2.11861796310414	1.50369657924535	-0.751859202084615	1.98939135698782	0.655961180935004	-0.0186531727285138	1.13730302508037	0.264969564466134	-0.971600683899136	0.765990490397256	0.498025992478568	1.07898949047096	3.67609297166769	2.64340847468532	0.552193085981524	0.557694007748858	0.205203517969776	0.770379568299788	1.52479935679331	0.577151021035403	2.9491694427349	3.57835547899255	2.77719467228956	3.0974864070979
VEGF	1.6446944696192	-1.01458613159306	0.249872213641485	1.36660613004155	-0.754076792809084	0.295929574732336	0.189262398909464	-0.296239842096236	-0.556158757175112	3.58119253374182	2.47957144132106	2.15681124795246	4.21702787300386	3.00785327973718	2.66825429640937	-0.715156546960835	0.987066371847944	0.770379568299788	1.6999729788073	0.238908136671614	1.81944935401444	3.83214468334936	3.18644979569161	3.79226053817124	2.82153190952933
