# Supplementary material for: Differential Impact of CD43 and CD28 on T-Cell Differentiation Depending on the Order of Engagement with the TCR
Source: Int J Mol Sci. 2024 Mar 8;25(6):3135. doi: 10.3390/ijms25063135 (PMC10970108; doi:10.3390/ijms25063135)
Supplement: Supplementary file 1 [file ijms-25-03135-s001.zip › Table S2.xlsx]

## Sheet: Sheet1
		CD43-TCRvsTCR-CD43 _Contrasts		CD28-TCRvsTCR-CD28 _Contrasts		CD43+TCRvsTCR-CD43_Constrats		CD28+TCRvsTCR-CD28_Contrasts
		logFC	adj.P.Val	logFC	adj.P.Val	logFC	adj.P.Val	logFC	adj.P.Val
Anqioqenin	ANG	3.91238	4.84784e-08	4.49501	1.46749e-07			3.29298	2.22026e-05
GCSF	CSF3	3.14899	3.00562e-06	4.05097	1.3594e-06			3.58224	9.58059e-06
GM-CSF	CSF2	2.5344	0.00517488	3.74521	0.000535545			2.75776	0.0180615
GRO-a	CXCL1	4.27997	2.84362e-05	4.28705	0.000473087
IFN-g	IFNG	3.68903	0.029273
IGF-1	IGF1	3.10705	0.00701058	4.04164	0.00357422			4.5531	0.000848787
IL-10	IL10	2.63918	0.00335539
IL-13	IL13	3.02324	0.000241353
IL-15	IL15	4.20641	1.42646e-05	4.00396	0.000505667			3.35635	0.00433443
IL-1a	IL1A	3.76677	0.000210726	2.8856	0.0438234
IL-3	IL3	3.60622	0.0011688
IL-5	IL5	3.0603	0.0223784
IL-6	IL6
IL-7	IL7	4.52429	2.72308e-05	4.14429	0.00141412			3.65938	0.00601721
Leptin	LEP	4.32898	2.71953e-06	4.58817	2.54905e-05	2.13547	0.0262191	4.34319	5.7059e-05
MCP-1	CCL2	3.31314	0.00808067	3.76488	0.017585
MCP-2	CCL8	3.22397	0.000908209	3.46484	0.0043328			4.09295	0.000574233
MCP-3	CCL7	3.88902	1.28654e-06	3.15609	0.000555096			2.74791	0.00304633
MDC	CCL22	3.69145	1.23345e-06	2.84948	0.00101609	2.72868	0.000122812	3.20903	0.000215038
MIG	CXCL9	4.2902	2.44967e-05	4.51188	0.000216002			3.74375	0.00232895
SCF	KITLG	3.41024	0.000392791	2.84695	0.0303852
TGF-B1	TGFB1	3.21356	7.09737e-06	3.87997	8.85875e-06			2.8524	0.000694347
EGF	EGF	3.34207	0.000236696			2.80476	0.00220471	3.06849	0.007921
ENA-78	CXCL5	4.2566	6.37461e-08	4.51468	7.36196e-07	2.59463	0.000156878	4.59226	5.5465e-07
I-309	CCL1	4.16556	1.71521e-05	3.86398	0.000823654	2.87108	0.00260422	4.13056	0.000346419
IL-12	IL12A	4.37158	1.27039e-08	4.02796	1.65472e-06	3.84466	1.21e-07	4.30053	5.63434e-07
IL-1b	IL1B	3.85521	0.0126392			3.8504	0.012803
IL-2	IL2	3.86375	2.17481e-05	2.95582	0.0093409	3.87479	2.08e-05	3.34045	0.00236605
IL-4	IL4	3.45979	0.000330854	3.59046	0.00264159	2.76383	0.00518596	3.9253	0.000892217
MCSF	CSF1	3.7389	2.81298e-06					2.30736	0.021782
MIP-1d	CCL15	2.96149	0.0224764			2.60704	0.000536651
Oncostatin_M	OSM
PDGF_BB	PDGFB	4.37031	6.58496e-10	5.05987	1.85981e-09	2.90092	9.03e-07	5.15033	1.34256e-09
SDF-1	CXCL12	4.00804	3.42803e-06	3.1112	0.00205868	4.00157	3.52e-06	3.50983	0.000454617
TARC	CCL17	4.26956	1.47796e-09	4.32057	4.57442e-08	3.82302	1.1e-08	4.47952	2.4207e-08
Thrombopoietin	THPO	3.77279	0.000122357	2.86103	0.0334875			3.25094	0.00935464
VEGF	VEGFA	3.51876	0.00172757			2.96024	0.0120434
IL-8	IL8
GRO	CXCL2
RANTES	CCL5
TNF-a	TNF	3.53968	0.0252399
TNF-b	LTA

## Sheet: Sheet2
	CD43-TCRvsTCR-CD43	CD28-TCRvsTCR-CD28	CD43+TCRvsTCR-CD43	CD28+TCRvsTCR-CD28
Anqioqenin	3.91238	4.49501		3.29298
GCSF	3.14899	4.05097		3.58224
GM-CSF	2.5344	3.74521		2.75776
GRO-a	4.27997	4.28705
IFN-g	3.68903
IGF-1	3.10705	4.04164		4.5531
IL-10	2.63918
IL-13	3.02324
IL-15	4.20641	4.00396		3.35635
IL-1a	3.76677	2.8856
IL-3	3.60622
IL-5	3.0603
IL-6
IL-7	4.52429	4.14429		3.65938
Leptin	4.32898	4.58817	2.13547	4.34319
MCP-1	3.31314	3.76488
MCP-2	3.22397	3.46484		4.09295
MCP-3	3.88902	3.15609		2.74791
MDC	3.69145	2.84948	2.72868	3.20903
MIG	4.2902	4.51188		3.74375
SCF	3.41024	2.84695
TGF-B1	3.21356	3.87997		2.8524
EGF	3.34207		2.80476	3.06849
ENA-78	4.2566	4.51468	2.59463	4.59226
I-309	4.16556	3.86398	2.87108	4.13056
IL-12	4.37158	4.02796	3.84466	4.30053
IL-1b	3.85521		3.8504
IL-2	3.86375	2.95582	3.87479	3.34045
IL-4	3.45979	3.59046	2.76383	3.9253
MCSF	3.7389			2.30736
MIP-1d	2.96149		2.60704
Oncostatin_M
PDGF_BB	4.37031	5.05987	2.90092	5.15033
SDF-1	4.00804	3.1112	4.00157	3.50983
TARC	4.26956	4.32057	3.82302	4.47952
Thrombopoietin	3.77279	2.86103		3.25094
VEGF	3.51876		2.96024
IL-8
GRO
RANTES
TNF-a	3.53968
TNF-b
