# Supplementary material for: Differential Impact of CD43 and CD28 on T-Cell Differentiation Depending on the Order of Engagement with the TCR
Source: Int J Mol Sci. 2024 Mar 8;25(6):3135. doi: 10.3390/ijms25063135 (PMC10970108; doi:10.3390/ijms25063135)
Supplement: Supplementary file 1 [file ijms-25-03135-s001.zip › Table S3.xlsx]

## Sheet: -log(p-value)
	CD43+TCRvsTCR-CD43		CD43-TCRvsTCR-CD43		CD28+TCRvsTCR-CD28		CD28-TCRvsTCR-CD28
	p-value	-log (p-value)	p-value	-log (p-value)	p-value	-log (p-value)	p-value	-log (p-value)
Molecular and Cellular Functions
Cellular Movement	1.86e-19	18.7305	5.92e-48	47.2277	9.58e-27	26.0186	2.79e-32	31.5544
Cell Death and Survival			1.08e-38	37.9666	5.53e-24	23.2573	1.21e-21	20.9172
Cellular Growth and Proliferation			3.1e-34	33.5086	9.85e-19	18.0066	2.3e-21	20.6383
Cell to Cell Signaling and Interaction	2.92e-13	12.5346	7.92e-34	33.1013	9.7e-20	19.0132	3.91e-19	18.4078
Cellular Development	4.47e-11	10.3497	4.04e-33	32.3936	6.52e-18	17.1858	2.17e-19	18.6635
Cellular Function and Maintenance	1.14e-11	10.9431
Gene Expression	2.06e-11	10.6861
Physiological System Development and Function
Immune Cell Trafficking	1.86e-19	18.7305	5.92e-48	47.2277	9.58e-27	26.0186	2.79e-32	31.5544
Hematological System Development and Function	1.86e-19	18.7305	1.14e-46	45.9431	4.17e-25	24.3799	1.36e-30	29.8665
Tissue Morphology			5.74e-37	36.2411	9.85e-20	19.0066	3.72e-26	25.4295
Tissue Development	1.41e-10	9.85078	3.1e-34	33.5086	9.85e-19	18.0066	2.3e-21	20.6383
Hematopoiesis	2.39e-10	9.6216	4.04e-33	32.3936	2.45e-17	16.6108	2.28e-20	19.6421
Cardiovascular System Development and Function	1.84e-10	9.73518
Diseases and Disorders
Inflammatory Response	1.96e-19	18.7077	2.15e-45	44.6676	4.09e-24	23.3883	1.12e-27	26.9508
Cancer	4.47e-11	10.3497	1.22e-29	28.9136	1.5e-14	13.8239	2.48e-15	14.6055
Organismal Injury and Abnormalities	4.47e-11	10.3497	1.22e-29	28.9136	1.5e-14	13.8239	2.48e-15	14.6055
Tumor Morphology	4.47e-11	10.3497	9.97e-29	28.0013	1.5e-14	13.8239	4.21e-14	13.3757
Inflammatory Disease	1.03e-09	8.98716	3.73e-25	24.4283	4.21e-16	15.3757	3.98e-15	14.4001
